# Supplementary material for: An efficient and green procedure for transformation of thiols to disulfides and thioamides in AGA8 aqueous micelles
Source: Royal Society of Chemistry journal article supplement (doi:10.1039/d3re00163f), 2023-01-01

## Supporting Information

### Table of Contents

|                                                                  |     |
|------------------------------------------------------------------|-----|
| General Information.....                                         | S2  |
| Synthesis and Characterization of N-alkyl Glucosamine (AGA)..... | S3  |
| General Procedure.....                                           | S3  |
| Characterization Data.....                                       | S3  |
| Synthesis of Thioamides from Mercaptans.....                     | S5  |
| General Procedure A.....                                         | S5  |
| Characterization Data.....                                       | S5  |
| Synthesis of Disulfides from Mercaptans.....                     | S10 |
| Conditions Optimization.....                                     | S10 |
| General Procedure B.....                                         | S10 |
| Characterization Data.....                                       | S10 |
| Synthesis of Thioamides from Disulfides.....                     | S14 |
| General Procedure C.....                                         | S14 |
| Characterization Data.....                                       | S14 |
| Optimized Coordinates of Key Structures.....                     | S16 |
| References.....                                                  | S33 |
| NMR Spectra.....                                                 | S34 |

## General Information

All solvents and reagents were purchased at the highest commercial quality grade and used without further purification, unless otherwise stated. All reactions were carried out under an atmosphere of nitrogen, unless otherwise stated. Reactions were monitored by GC, HPLC, and thin layer chromatography (TLC). Column chromatography was performed using E. Merck silica (60, particle size 0.040 – 0.045 mm). TLC analysis was performed using 0.25 mm E. Merck silica plates (60F-254), using 254 nm UV light as the visualizing agent. HPLC analysis was performed on a 1220 Infinity II, Agilent with silica column (Supersil ODS2 5 $\mu$ m, 4.6 mm  $\times$  250 mm). GC analysis was recorded on an Agilent 7890A. Melting points were determined using a digital melting point apparatus (Shanghai INESA Physico-Optical Instrument Co., Ltd. SGW ® X-4B) and were uncorrected.  $^1\text{H}$  NMR spectra was recorded at ambient temperature on 400 MHz NMR spectrometers (Bruker AVANCE III) using deuterated chloroform ( $\text{CDCl}_3$ ) or deuterated dimethyl sulfoxide ( $\text{DMSO}-d_6$ ) as solvent and tetramethylsilane (TMS,  $\delta = 0$ ) as internal reference. Chemical shifts are reported in parts per million (ppm) downfield and quoted to the nearest 0.01 ppm relative to the residual protons in the NMR solvent ( $\text{CHCl}_3 = \delta 7.26$ ,  $\text{DMSO}-d_6 = \delta 2.62$ ), and coupling constants (J) are quoted in Hertz. Data are reported as follows: chemical shift, multiplicity, coupling constants, number of protons. Coupling constants were quoted to the nearest 0.1 Hz and multiplicity reported according to the following convention: s = singlet, d = doublet, t = triplet, q = quartet, m = multiplet, br = broad singlet, and associated combinations for example: dd=doublet of doublet, dt=doublet of triplet, tt=triplet of triplet.  $^{13}\text{C}$  NMR spectra were measured at ambient temperature on 101 MHz NMR spectrometers (Bruker AVANCE III). Chemical shifts are reported in ppm from tetramethylsilane with the solvent resonance as the internal standard ( $\text{CDCl}_3 = \delta 77.16$ ,  $\text{DMSO}-d_6 = \delta 39.52$ ). IR spectra were measured on Nicolet IS50 FT-IR Spectrometers. GC-MS analysis was recorded on an Agilent 5977B MSD Series spectrometer. HRMS (high-resolution mass spectra) were recorded on a Shimadzu LCMS-IT-TOF mass spectrometer by electrospray ionization time of flight reflectron experiments. The surface tension ( $\gamma$ ) was measured at 25  $^\circ\text{C}$  by the pendant method using an OCA 40 optical contact angle instrument (Dataphysics, Germany). The size and distribution of aggregates were measured by the ALV / DLS / SLS-5022F laser light scattering system under the condition of He-Ne laser ( $\lambda=632.8$  nm) 90  $^\circ\text{C}$ , and the autocorrelation function is analyzed by CONTIN software.

# Synthesis and Characterization of N-alkyl Glucosamine (AGA)

## General Procedure

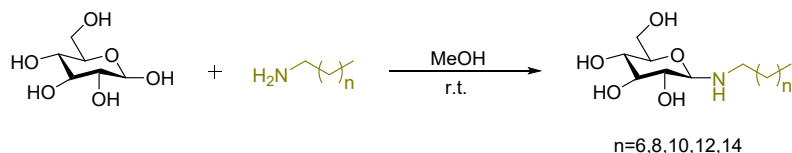

A mixture of glucose (0.1 mol) and N-alkylamine (0.1 mol) in CH<sub>3</sub>OH (200 mL) were stirred for 24 hours at room temperature. Then the final mixture was suction filtered to remove solvent CH<sub>3</sub>OH, washed the filter cake three times with cyclohexane, once with water, twice with ethanol, recrystallized twice with ethanol, and dried in vacuum to give solid powder.

## Characterization Data

### N-Octyl glucosamine (AGA8)

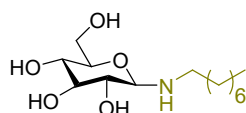

White solid powder (26.8g, 92%), **mp.** 106.5 – 109.6 °C. **<sup>1</sup>H NMR** (400 MHz, DMSO-*d*<sub>6</sub>) δ 4.84 – 4.63 (m, 2H), 4.46 – 4.24 (m, 2H), 4.06 – 3.42 (m, 5H), 3.03 (d, *J* = 12.2 Hz, 2H), 2.91 – 2.77 (m, 1H), 2.80 – 2.67 (m, 1H), 1.34 (s, 2H), 1.21 (s, 10H), 0.82 (s, 3H); **<sup>13</sup>C NMR** (101 MHz, DMSO-*d*<sub>6</sub>) δ 91.32, 78.05 (d, *J* = 16.5 Hz), 74.04, 71.06, 61.92, 46.08, 31.82, 30.50, 29.52 (d, *J* = 8.7 Hz), 29.28, 27.39, 22.64, 14.48. **IR** (film) 3399.48, 2916.72, 2849.23, 1467.30, 1380.83, 1330.73, 1145.12, 1079.72, 1015.08, 992.36, 720.04 cm<sup>-1</sup>. **HRMS** (ESI-TOF) *m/z*: [M + H]<sup>+</sup> calcd. for C<sub>14</sub>H<sub>30</sub>NO<sub>5</sub> 292.2124, found 292.2122; [M + Na]<sup>+</sup> calcd. for C<sub>14</sub>H<sub>29</sub>NNaO<sub>5</sub> 314.1943, found 314.1925.

### N-Decyl glucosamine (AGA10)

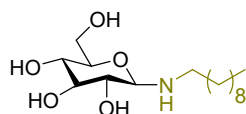

White solid powder (27.5g, 86%), **mp.** 109.9 – 110.4 °C. **<sup>1</sup>H NMR** (400 MHz, DMSO-*d*<sub>6</sub>) δ 4.84 – 4.62 (m, 2H), 4.46 – 4.21 (m, 2H), 3.55 (dd, *J* = 37.6, 8.0 Hz, 5H), 3.03 (d, *J* = 43.0 Hz, 2H), 2.82 (t, *J* = 8.6 Hz, 1H), 2.75 (dd, *J* = 11.4, 7.0 Hz, 1H), 1.34 (s, 2H), 1.20 (s, 14H), 0.81 (t, *J* = 6.2 Hz, 3H); **<sup>13</sup>C NMR** (101 MHz, DMSO-*d*<sub>6</sub>) δ 91.31, 78.05 (d, *J* = 16.9 Hz), 74.04, 71.07, 61.92, 46.09, 31.83, 30.50, 29.59 (d, *J* = 6.3 Hz), 29.26, 27.39, 22.63, 14.48. **IR** (film) 3398.67, 2916.02, 2848.27, 1467.83, 1381.70, 1330.83, 1145.61, 1079.66, 1016.66, 992.84, 719.90 cm<sup>-1</sup>. **HRMS** (ESI-TOF) *m/z*: [M + H]<sup>+</sup> calcd. for C<sub>16</sub>H<sub>34</sub>NO<sub>5</sub> 320.2437, found 320.2423; [M + Na]<sup>+</sup> calcd. for C<sub>16</sub>H<sub>33</sub>NNaO<sub>5</sub> 342.2256, found 342.2220.

### N-Dodecyl glucosamine (AGA12) <sup>1</sup>

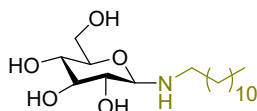

White solid powder (28.1g, 81%), **mp.** 111.7 – 112.5 °C. **<sup>1</sup>H NMR** (400 MHz, DMSO-*d*<sub>6</sub>) δ 4.84 – 4.63 (m, 2H), 4.45 – 4.22 (m, 2H), 3.66 – 3.37 (m, 5H), 3.10 – 2.95 (m, 2H), 2.82 (td, *J* = 8.6, 3.0 Hz, 1H), 2.73 (dd, *J* = 11.4, 7.2 Hz, 1H), 1.40 – 1.30 (m, 2H), 1.20 (s, 18H), 0.81 (t, *J* = 6.8 Hz, 3H); **<sup>13</sup>C NMR** (101 MHz, DMSO-*d*<sub>6</sub>) δ 91.32, 78.05 (d, *J* = 16.6 Hz), 74.04, 71.07, 61.92, 46.09, 31.83, 30.51, 29.59 (d, *J* = 6.9 Hz), 29.25, 27.38, 22.63, 14.48. **IR** (film) 3397.78, 2915.54, 2847.86, 1468.23, 1381.60, 1330.44, 1145.77, 1079.68, 1014.47, 992.25, 719.81 cm<sup>-1</sup>. **HRMS** (ESI-TOF) *m/z*: [M + H]<sup>+</sup> calcd. for C<sub>18</sub>H<sub>38</sub>NO<sub>5</sub> 348.2750, found 348.2746; [M + Na]<sup>+</sup> calcd. for C<sub>18</sub>H<sub>37</sub>NNaO<sub>5</sub> 370.2569, found 370.2552.

#### N-Tetradecyl glucosamine (AGA14) <sup>1</sup>

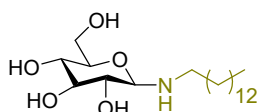

White solid powder (29.3g, 78%), **mp.** 112.7 – 113.6 °C. **<sup>1</sup>H NMR** (400 MHz, DMSO-*d*<sub>6</sub>) δ 4.87 – 4.64 (m, 2H), 4.45 – 4.24 (m, 2H), 3.65 – 3.38 (m, 5H), 3.14 – 2.92 (m, 2H), 2.82 (td, *J* = 9.2, 8.6, 3.6 Hz, 1H), 2.74 (dt, *J* = 11.4, 7.2 Hz, 1H), 1.43 – 1.24 (m, 2H), 1.20 (s, 22H), 0.81 (t, *J* = 6.8 Hz, 3H); **<sup>13</sup>C NMR** (101 MHz, DMSO-*d*<sub>6</sub>) δ 91.31, 78.05 (d, *J* = 17.0 Hz), 74.04, 71.07, 61.92, 46.09, 31.83, 30.51, 29.57 (d, *J* = 4.5 Hz), 29.24, 27.39, 22.63, 14.48. **IR** (film) 3400.05, 2915.30, 2848.49, 1470.86, 1344.56, 1330.50, 1145.53, 1081.76, 1014.94, 992.56, 716.17 cm<sup>-1</sup>. **HRMS** (ESI-TOF) *m/z*: [M + H]<sup>+</sup> calcd. for C<sub>20</sub>H<sub>42</sub>NO<sub>5</sub> 376.3063, found 376.3053; [M + Na]<sup>+</sup> calcd. for C<sub>20</sub>H<sub>41</sub>NNaO<sub>5</sub> 398.2882, found 398.2862.

#### N-Hexadecyl glucosamine (AGA16) <sup>1</sup>

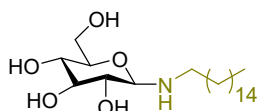

White solid powder (29.1g, 72%), **mp.** 116.1 – 116.5 °C. **<sup>1</sup>H NMR** (400 MHz, DMSO-*d*<sub>6</sub>) δ 4.90 – 4.62 (m, 2H), 4.49 – 4.21 (m, 2H), 3.73 – 3.42 (m, 5H), 3.14 – 2.91 (m, 2H), 2.86 – 2.77 (m, 1H), 2.73 (dd, *J* = 12.2, 6.8 Hz, 1H), 1.34 (s, 2H), 1.20 (s, 26H), 0.81 (t, *J* = 6.4 Hz, 3H). **<sup>13</sup>C NMR** (101 MHz, DMSO-*d*<sub>6</sub>) δ 91.26, 78.06 (d, *J* = 20.6 Hz), 74.03, 71.06, 61.91, 46.07, 31.82, 30.46, 29.55 (d, *J* = 4.2 Hz), 29.23, 27.37, 22.62, 14.48. **IR** (film) 3400.25, 2915.97, 2847.72, 1468.77, 1376.68, 1329.83, 1146.26, 1080.18, 1017.75, 991.36, 720.45 cm<sup>-1</sup>. **HRMS** (ESI-TOF) *m/z*: [M + H]<sup>+</sup> calcd. for C<sub>22</sub>H<sub>46</sub>NO<sub>5</sub> 404.3376, found 404.3376; [M + Na]<sup>+</sup> calcd. for C<sub>22</sub>H<sub>45</sub>NNaO<sub>5</sub> 426.3195, found 426.3165.

## Synthesis of Thioamides from Mercaptans

### General Procedure A

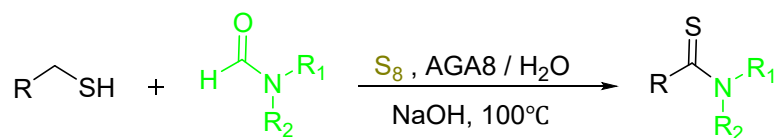

To a Schlenk tube were added mercaptans (3.0 mmol), elemental sulfur (0.14 g, 4.5 mmol), NaOH (0.24 g, 6.0 mmol) and formamide (6.0 mmol) in 1.5 wt% AGA8 aqueous solution (6 mL). The mixture was stirred at 100°C for 6 h, and monitored by TLC and HPLC. When the reaction was finished, the mixture was cooled to rt, quenched by H<sub>2</sub>O (6 mL) and extracted with ethyl acetate (6 mL×3). Then the combined extract was washed with saturated aqueous NaCl (6 mL×3), dried over anhydrous sodium sulfate and concentrated under vacuum. Purification by column chromatography on silica gel affords product thioamide.

### Characterization Data

#### N,N-Dimethylbenzothioamide (1a) <sup>2</sup>

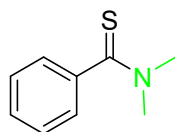

Following general **procedure A** on 3.0 mmol scale. The title compound (0.40 g, 81 %) was obtained through silica gel column chromatography (ethyl acetate: petroleum ether = 1:15) as a yellow solid, **mp.** 66.8 – 68.7 °C. **<sup>1</sup>H NMR** (400 MHz, CDCl<sub>3</sub>) δ 7.37 – 7.19 (m, 5H), 3.54 (s, 3H), 3.10 (s, 3H); **<sup>13</sup>C NMR** (101 MHz, CDCl<sub>3</sub>) δ 201.14, 143.35, 128.57, 128.32, 125.71, 44.19, 43.25. **HRMS** (ESI-TOF) m/z: [M+H]<sup>+</sup> calcd. for C<sub>9</sub>H<sub>12</sub>NS 166.0685, found 166.0673.

#### N,N,3-Trimethylbenzothioamide (1b) <sup>2</sup>

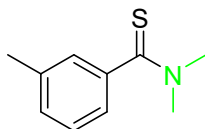

Following general **procedure A** on 3.0 mmol scale. The title compound (0.40 g, 72%) was obtained through silica gel column chromatography (ethyl acetate: petroleum ether = 1: 20) as bright yellow oil. **<sup>1</sup>H NMR** (400 MHz, CDCl<sub>3</sub>) δ 7.31 – 7.26 (m, 1H), 7.17 (d, *J* = 5.8 Hz, 2H), 7.11 (d, *J* = 7.6 Hz, 1H), 3.64 (s, 3H), 3.21 (s, 3H), 2.39 (s, 3H); **<sup>13</sup>C NMR** (101 MHz, CDCl<sub>3</sub>) δ 200.53, 142.32, 137.16, 128.29, 127.17, 125.34, 121.58, 43.11, 42.15, 20.36. **HRMS** (ESI-TOF) m/z: [M+H]<sup>+</sup> calcd. for C<sub>10</sub>H<sub>14</sub>NS 180.0841, found 180.0825.

#### N,N,4-Trimethylbenzothioamide (1c) <sup>2</sup>

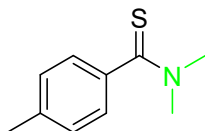

Following general **procedure A** on 3.0 mmol scale. The title compound (0.37 g, 68%) was obtained through silica gel column chromatography (ethyl acetate: petroleum ether = 1:15) as a bright yellow solid, **mp.** 50.5 – 51.3 °C. **<sup>1</sup>H NMR** (400 MHz, CDCl<sub>3</sub>) δ 7.21 – 6.97 (m, 4H), 3.51 (s, 3H), 3.10 (s, 3H), 2.27 (s, 3H). **<sup>13</sup>C NMR** (101 MHz, CDCl<sub>3</sub>) δ 201.50, 140.55, 138.69, 128.89, 125.88, 44.24, 43.36, 21.28. **HRMS** (ESI-TOF) m/z: [M+H]<sup>+</sup> calcd. for C<sub>10</sub>H<sub>14</sub>NS 180.0841, found 180.0828.

### 3-Methoxy-N,N-dimethylbenzothioamide (1d) <sup>3</sup>

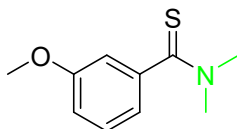

Following general **procedure A** on 3.0 mmol scale. The title compound (0.38 g, 65%) was obtained through silica gel column chromatography (ethyl acetate: petroleum ether = 1:15) as bright yellow oil. **<sup>1</sup>H NMR** (400 MHz, CDCl<sub>3</sub>): δ 7.25 (t, *J* = 8.2 Hz, 1H), 6.95 – 6.72 (m, 3H), 3.80 (s, 3H), 3.59 (s, 3H), 3.16 (s, 3H). **<sup>13</sup>C NMR** (101 MHz, CDCl<sub>3</sub>): δ 200.93, 159.41, 144.56, 129.51, 117.83, 114.41, 111.29, 55.36, 44.11, 43.14. **HRMS** (ESI-TOF) m/z: [M+H]<sup>+</sup> calcd. for C<sub>10</sub>H<sub>14</sub>NOS 196.0791, found 196.0783.

### 4-*tert*-Butyl-N,N-dimethylbenzothioamide (1e) <sup>4</sup>

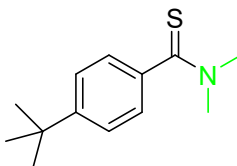

Following general **procedure A** on 3.0 mmol scale. The title compound (0.53 g, 73%) was obtained through silica gel column chromatography (ethyl acetate: petroleum ether = 1:10) as a brown yellow solid, **mp.** 101.5 – 102.8 °C. **<sup>1</sup>H NMR** (400 MHz, CDCl<sub>3</sub>) δ 7.35 – 7.32 (m, 2H), 7.28 – 7.20 (m, 2H), 3.58 (s, 3H), 3.17 (s, 3H), 1.29 (s, 9H); **<sup>13</sup>C NMR** (101 MHz, CDCl<sub>3</sub>) δ 201.67, 151.85, 140.55, 125.76, 125.29, 44.36, 43.39, 34.77, 31.31. **HRMS** (ESI-TOF) m/z: [M + Na]<sup>+</sup> calcd. for C<sub>13</sub>H<sub>19</sub>NNaS 244.1136, found 245.1125.

### 4-Fluoro-N,N-dimethylbenzothioamide (1f) <sup>5</sup>

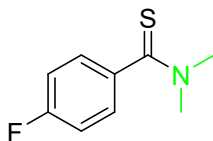

Following general **procedure A** on 3.0 mmol scale. The title compound (0.34 g, 62%) was obtained through silica gel column chromatography (ethyl acetate: petroleum ether = 1:15) as a yellow solid, **mp.** 84.3 – 85.7 °C. **<sup>1</sup>H NMR** (400 MHz, CDCl<sub>3</sub>): δ 7.26 – 7.21 (m, 2H), 6.97 (t, *J* = 8.8 Hz, 2H),

3.52 (s, 3H), 3.11 (s, 3H).  $^{13}\text{C}$  NMR (101 MHz,  $\text{CDCl}_3$ ):  $\delta$  200.17, 163.89, 139.40 (d,  $J = 3.6$  Hz), 127.98 (d,  $J = 8.5$  Hz), 115.33 (d,  $J = 22.1$  Hz), 44.25, 43.45.  $^{19}\text{F}$  NMR (376 MHz,  $\text{CDCl}_3$ ):  $\delta$  -112.24. HRMS (ESI-TOF)  $m/z$ :  $[\text{M}+\text{H}]^+$  calcd. for  $\text{C}_9\text{H}_{11}\text{FNS}$  184.0591, found 184.0589.

#### 4-Chloro-*N,N*-dimethylbenzothioamide (**1g**)<sup>2</sup>

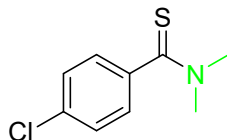

Following general **procedure A** on 3.0 mmol scale. The title compound (0.45 g, 75%) was obtained through silica gel column chromatography (ethyl acetate: petroleum ether = 1:15) as a yellow solid, **mp.** 78.4 – 79.9 °C.  $^1\text{H}$  NMR (400 MHz,  $\text{CDCl}_3$ )  $\delta$  7.26 (d,  $J = 8.6$  Hz, 2H), 7.18 (d,  $J = 8.6$  Hz, 2H), 3.52 (s, 3H), 3.10 (s, 3H);  $^{13}\text{C}$  NMR (101 MHz,  $\text{CDCl}_3$ )  $\delta$  199.90, 141.69, 134.64, 128.63, 127.35, 44.26, 43.39. HRMS (ESI-TOF)  $m/z$ :  $[\text{M}+\text{H}]^+$  calcd. for  $\text{C}_9\text{H}_{11}\text{ClNS}$  200.0295, found 200.0285.

#### 4-Bromo-*N,N*-dimethylbenzothioamide (**1h**)<sup>2</sup>

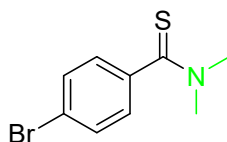

Following general **procedure A** on 3.0 mmol scale. The title compound (0.52 g, 72%) was obtained through silica gel column chromatography (ethyl acetate: petroleum ether = 1:15) as a yellow solid, **mp.** 117.6 – 118.5 °C.  $^1\text{H}$  NMR (400 MHz,  $\text{CDCl}_3$ )  $\delta$  7.48 – 7.44 (m, 2H), 7.18 – 7.14 (m, 2H), 3.55 (s, 3H), 3.14 (s, 3H).  $^{13}\text{C}$  NMR (101 MHz,  $\text{CDCl}_3$ )  $\delta$  199.81, 142.19, 131.62, 127.54, 122.80, 44.30, 43.37. HRMS (ESI-TOF)  $m/z$ :  $[\text{M} + \text{H}]^+$  calcd. for  $\text{C}_9\text{H}_{11}\text{BrNS}$  243.9796, found 243.9778.

#### *N,N*-Dimethyl-3-(trifluoromethyl)benzothioamide (**1i**)<sup>2</sup>

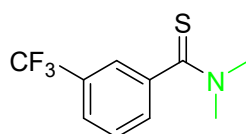

Following general **procedure A** on 3.0 mmol scale. The title compound (0.52 g, 75 %) was obtained through silica gel column chromatography (ethyl acetate: petroleum ether = 1: 20) as bright yellow oil.  $^1\text{H}$  NMR (400 MHz,  $\text{CDCl}_3$ ):  $\delta$  7.53 – 7.41 (m, 4H), 3.54 (s, 3H), 3.10 (s, 3H).  $^{13}\text{C}$  NMR (101 MHz,  $\text{CDCl}_3$ ):  $\delta$  198.12, 142.83, 129.48 (dd,  $J = 64.7, 32.4$  Hz), 128.02 (d,  $J = 4.2$  Hz), 127.90, 124.26 (q,  $J = 3.6$  Hz), 123.25 (q,  $J = 3.9$  Hz), 121.63 (q,  $J = 4.0$  Hz), 43.14, 42.23.  $^{19}\text{F}$  NMR (376 MHz,  $\text{CDCl}_3$ ):  $\delta$  -62.75. HRMS (ESI-TOF)  $m/z$ :  $[\text{M}+\text{H}]^+$  calcd. for  $\text{C}_{10}\text{H}_{11}\text{F}_3\text{NS}$  234.0559, found 234.0540.

#### *N,N*-Dimethylfuran-2-carbothioamide (**1j**)<sup>4</sup>

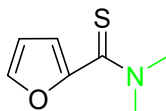

Following general **procedure A** on 3.0 mmol scale. The title compound (0.27 g, 57%) was obtained through silica gel column chromatography (ethyl acetate: petroleum ether = 1:15) as a black solid, **mp.** 35.8 – 37.2 °C. **<sup>1</sup>H NMR** (400 MHz, CDCl<sub>3</sub>) δ 7.48 – 7.45 (m, 1H), 7.09 (dd, *J* = 3.4, 0.8 Hz, 1H), 6.45 (dd, *J* = 3.6, 1.8 Hz, 1H), 3.55 (s, 3H), 3.43 (s, 3H); **<sup>13</sup>C NMR** (101 MHz, CDCl<sub>3</sub>) δ 185.76, 152.42, 143.21, 117.73, 111.92, 44.44, 44.22. **HRMS** (ESI-TOF) *m/z*: [M+H]<sup>+</sup> calcd. for C<sub>7</sub>H<sub>10</sub>NOS 156.0478, found 156.0473.

#### **N,N-Dimethylpyridine-3-carbothioamide (1k)** <sup>4</sup>

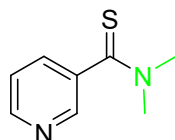

Following general **procedure A** on 3.0 mmol scale. The title compound (0.41 g, 83%) was obtained through silica gel column chromatography (ethyl acetate: petroleum ether = 1: 3) as yellow oil. **<sup>1</sup>H NMR** (400 MHz, CDCl<sub>3</sub>) δ 8.63 – 8.50 (m, 2H), 7.70 – 7.67 (m, 1H), 7.31 (dd, *J* = 7.8, 4.8 Hz, 1H), 3.61 (s, 3H), 3.21 (s, 3H). **<sup>13</sup>C NMR** (101 MHz, CDCl<sub>3</sub>) δ 197.51, 149.51, 146.08, 139.18, 133.83, 123.22, 44.25, 43.38. **HRMS** (ESI-TOF) *m/z*: [M+H]<sup>+</sup> calcd. for C<sub>8</sub>H<sub>11</sub>N<sub>2</sub>S 167.0637, found 167.0641.

#### **Thiobenzmorpholid (1l)** <sup>2</sup>

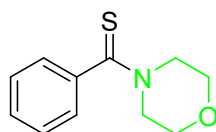

Following general **procedure A** on 3.0 mmol scale. The title compound (0.50 g, 80%) was obtained through silica gel column chromatography (ethyl acetate: petroleum ether = 1:15) as a bright yellow solid, **mp.** 142.0 – 143.1 °C. **<sup>1</sup>H NMR** (400 MHz, CDCl<sub>3</sub>) δ 7.33 – 7.25 (m, 3H), 7.23 – 7.19 (m, 2H), 4.43 – 4.33 (m, 2H), 3.86 – 3.79 (m, 2H), 3.60 – 3.51 (m, 4H); **<sup>13</sup>C NMR** (101 MHz, CDCl<sub>3</sub>) δ 142.46, 128.89, 128.56, 125.87, 66.76, 66.54, 52.52, 49.55. **HRMS** (ESI-TOF) *m/z*: [M+H]<sup>+</sup> calcd. for C<sub>11</sub>H<sub>14</sub>NOS 208.0791, found 208.0784.

#### **N-Thiobenzoylpiperidine (1m)** <sup>2</sup>

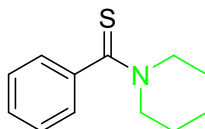

Following general **procedure A** on 3.0 mmol scale. The title compound (0.42 g, 68%) was obtained through silica gel column chromatography (ethyl acetate: petroleum ether = 1:15) as a brown yellow solid, **mp.** 65.5 – 66.5 °C. **<sup>1</sup>H NMR** (400 MHz, CDCl<sub>3</sub>) δ 7.27 (q, *J* = 8.2, 7.8 Hz, 3H), 7.21 – 7.17 (m, 2H), 4.40 – 4.14 (m, 2H), 3.55 – 3.33 (m, 2H), 1.75 (q, *J* = 6.0 Hz, 2H), 1.70 – 1.64 (m, 2H), 1.49 (dd, *J* = 11.6, 5.6 Hz, 2H); **<sup>13</sup>C NMR** (101 MHz, CDCl<sub>3</sub>) δ 199.60, 128.41, 128.36, 125.42, 53.18, 50.63, 26.90, 25.51, 24.18. **HRMS** (ESI-TOF) *m/z*: [M+H]<sup>+</sup> calcd. for C<sub>12</sub>H<sub>16</sub>NS 206.0998, found 206.0981.



### N,N-Dimethylbutanethioamide (1n) <sup>6</sup>

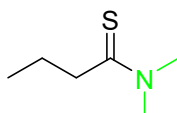

Following general **procedure A** on 3.0 mmol scale. The title compound (0.25 g, 63%) was obtained through silica gel column chromatography (ethyl acetate: petroleum ether =1: 20) as light yellow oil. **<sup>1</sup>H NMR** (400 MHz, CDCl<sub>3</sub>) δ 3.49 (s, 3H), 3.30 (s, 3H), 2.84 – 2.74 (m, 2H), 1.83 – 1.83 (m, 2H), 1.01 (t, *J* = 7.4 Hz, 3H). **<sup>13</sup>C NMR** (101 MHz, CDCl<sub>3</sub>) δ 204.34, 45.60, 44.56, 41.59, 22.50, 13.89. **HRMS** (ESI-TOF) *m/z*: [M+H]<sup>+</sup> calcd. for C<sub>6</sub>H<sub>14</sub>NS 132.0841, found 132.0856.

### N,N,2-Trimethylpropanethioamide (1o) <sup>7</sup>

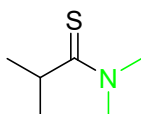

Following general **procedure A** on 3.0 mmol scale. The title compound (0.23 g, 58%) was obtained through silica gel column chromatography (ethyl acetate: petroleum ether =1: 20) as light yellow oil. **<sup>1</sup>H NMR** (400 MHz, CDCl<sub>3</sub>) δ 3.51 (s, 3H), 3.36 (s, 3H), 3.16 (p, *J* = 6.6 Hz, 1H), 1.23 (d, *J* = 6.5 Hz, 6H); **<sup>13</sup>C NMR** (101 MHz, CDCl<sub>3</sub>) δ 211.10, 45.15, 41.25, 37.08, 23.20. **HRMS** (ESI-TOF) *m/z*: [M+H]<sup>+</sup> calcd. for C<sub>6</sub>H<sub>14</sub>NS 132.0841, found 132.0861.

### 4-Thiobutyryl-morpholine (1p)

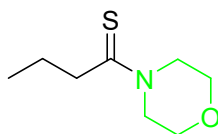

Following general **procedure A** on 3.0 mmol scale. The title compound (0.34 g, 66%) was obtained through silica gel column chromatography (ethyl acetate: petroleum ether =1: 20) as brown black oil. **<sup>1</sup>H NMR** (400 MHz, CDCl<sub>3</sub>) δ 4.37 – 4.31 (m, 2H), 3.79 – 3.76 (m, 2H), 3.74 (s, 4H), 2.87 – 2.80 (m, 2H), 1.74 (m, 2H), 1.01 (t, *J* = 7.4 Hz, 3H); **<sup>13</sup>C NMR** (101 MHz, CDCl<sub>3</sub>) δ 203.81, 66.57, 66.53, 50.12, 49.92, 45.52, 22.67, 13.89. **HRMS** (ESI-TOF) *m/z*: [M+H]<sup>+</sup> calcd. for C<sub>8</sub>H<sub>16</sub>NOS 174.0947, found 174.0951.

### N,N-Dimethyl-2-phenylethanethioamide (1q) <sup>8</sup>

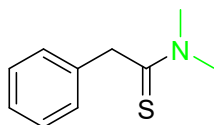

Following general **procedure A** on 3.0 mmol scale. The title compound (0.37 g, 70%) was obtained through silica gel column chromatography (ethyl acetate: petroleum ether =1: 10) as a light yellow solid, **mp.** 75.2 – 76.4 °C. **<sup>1</sup>H NMR** (400 MHz, CDCl<sub>3</sub>) δ 7.36 – 7.22 (m, 5H), 4.32 (s, 2H), 3.50 (s, 3H), 3.20 (s, 3H); **<sup>13</sup>C NMR** (101 MHz, CDCl<sub>3</sub>) δ 200.62, 135.67, 128.81, 128.08, 126.96, 50.95, 44.84, 42.30. **HRMS** (ESI-TOF) *m/z*: [M+H]<sup>+</sup> calcd. for C<sub>10</sub>H<sub>14</sub>NS 180.0841, found 180.0828.

# Synthesis of Disulfides from Mercaptans

## Conditions Optimization

Table S1 Optimization of reaction conditions

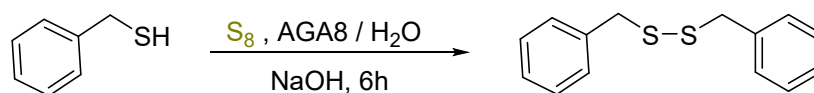

| Entry    | S <sub>8</sub> (equiv.) | Temp (°C) | Yield <sup>a</sup> |
|----------|-------------------------|-----------|--------------------|
| 1        | 1.5                     | 100       | 95%                |
| 2        | 1.5                     | 75        | 96%                |
| 3        | 1.5                     | 50        | 95%                |
| 4        | 1.5                     | rt        | 94%                |
| 5        | 1.0                     | rt        | 96%                |
| <b>6</b> | <b>0.5</b>              | <b>rt</b> | <b>96%</b>         |
| 7        | 0.1                     | rt        | 45%                |
| 8        | 0                       | rt        | 11%                |

Typical conditions: Benzyl mercaptan (1.0 mmol), NaOH (2.0 mmol), 1.5wt% AGA8, H<sub>2</sub>O (2 mL). <sup>a</sup> Determined by HPLC (Hypersil ODS C18, 35 °C, λ=254 nm, MeOH, 1 mL/min) analysis: Benzyl mercaptan (3.3 min), dibenzyl disulfide (4.1 min).

## General Procedure B

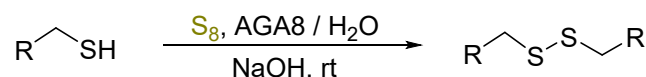

To a Schlenk tube were added mercaptans (3.0 mmol), elemental sulfur (0.05 g, 1.5 mmol), and NaOH (0.24 g, 6.0 mmol) in 1.5 wt% AGA8 aqueous solution (6 mL). The mixture was stirred at room temperature for 6 h, and monitored by TLC and HPLC/ GC. When the reaction was finished, the mixture was quenched by H<sub>2</sub>O (6 mL) and extracted with ethyl acetate (6 mL×3). Then the combined extract was washed with saturated aqueous NaCl (6 mL×3), dried over anhydrous sodium sulfate and concentrated under vacuum.

## Characterization Data

### Dibenzyl disulfide (2a) <sup>9</sup>

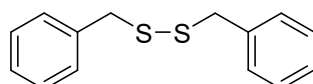

Following general **procedure B** on 3.0 mmol scale. The title compound (0.35 g, 96%) was obtained through silica gel column chromatography (100% petroleum ether) as a white solid, **mp.** 68.9 – 70.3 °C. <sup>1</sup>H NMR (400 MHz, CDCl<sub>3</sub>) δ 7.36 – 7.20 (m, 10H), 3.59 (s, 4H); <sup>13</sup>C NMR (101 MHz, CDCl<sub>3</sub>) δ 137.37, 129.44, 128.50, 127.45, 43.28. **GC-MS** (EI) m/z: [M] calcd. for C<sub>14</sub>H<sub>14</sub>S<sub>2</sub> 246.05, found

246.04.

**Bis(3-methylbenzyl) disulfide (2b)** <sup>10</sup>

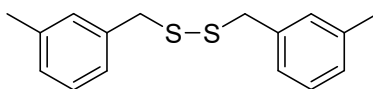

Following general **procedure B** on 3.0 mmol scale. The title compound (0.36 g, 88%) was obtained through silica gel column chromatography (100% petroleum ether) as yellow oil. **<sup>1</sup>H NMR** (400 MHz, CDCl<sub>3</sub>) δ 7.33 – 7.27 (m, 2H), 7.17 (dd, *J* = 13.2, 6.2 Hz, 6H), 3.68 (s, 4H), 2.44 (s, 6H); **<sup>13</sup>C NMR** (101 MHz, CDCl<sub>3</sub>) δ 138.25, 137.50, 130.41, 128.62, 128.41, 126.71, 43.53, 21.61. **GC-MS** (EI) *m/z*: [M] calcd. for C<sub>16</sub>H<sub>18</sub>S<sub>2</sub> 274.08, found 274.05.

**Bis(4-methylbenzyl) disulfide (2c)** <sup>9</sup>

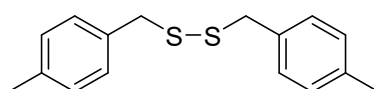

Following general **procedure B** on 3.0 mmol scale. The title compound (0.37 g, 91%) was obtained through silica gel column chromatography (100% petroleum ether) as a yellow solid, **mp.** 45.3 – 46.2 °C. **<sup>1</sup>H NMR** (400 MHz, CDCl<sub>3</sub>) δ 7.12 (s, 8H), 3.58 (s, 4H), 2.32 (s, 6H); **<sup>13</sup>C NMR** (101 MHz, CDCl<sub>3</sub>) δ 137.16, 134.34, 129.36, 129.22, 43.05, 21.25. **GC-MS** (EI) *m/z*: [M] calcd. for C<sub>16</sub>H<sub>18</sub>S<sub>2</sub> 274.08, found 274.04.

**Bis(3-methoxybenzyl) disulfide (2d)** <sup>11</sup>

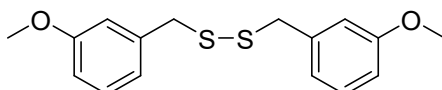

Following general **procedure B** on 3.0 mmol scale. The title compound (0.42 g, 91%) was obtained through silica gel column chromatography (100% petroleum ether) as a yellow solid, **mp.** 80.2 – 80.9 °C. **<sup>1</sup>H NMR** (400 MHz, CDCl<sub>3</sub>) δ 7.24 (t, *J* = 7.2 Hz, 2H), 6.91 – 6.77 (m, 6H), 3.81 (s, 6H), 3.61 (s, 4H); **<sup>13</sup>C NMR** (101 MHz, CDCl<sub>3</sub>) δ 159.78, 139.01, 129.61, 121.85, 115.03, 113.16, 55.31, 43.44. **GC-MS** (EI) *m/z*: [M] calcd. for C<sub>16</sub>H<sub>18</sub>O<sub>2</sub>S<sub>2</sub> 306.07, found 306.05.

**Bis(4-*tert*-butylbenzyl) disulfide (2e)** <sup>9</sup>

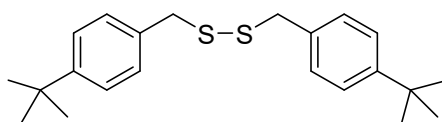

Following general **procedure B** on 3.0 mmol scale. The title compound (0.46 g, 86%) was obtained through silica gel column chromatography (100% petroleum ether) as a yellow solid, **mp.** 66.2 – 67.1 °C. **<sup>1</sup>H NMR** (400 MHz, CDCl<sub>3</sub>) δ 7.35 (d, *J* = 8.2 Hz, 4H), 7.18 (d, *J* = 8.2 Hz, 4H), 3.61 (s, 4H), 1.32 (s, 18H); **<sup>13</sup>C NMR** (101 MHz, CDCl<sub>3</sub>) δ 150.57, 134.31, 129.20, 125.50, 43.07, 34.64, 31.45. **GC-MS** (EI) *m/z*: [M] calcd. for C<sub>22</sub>H<sub>30</sub>S<sub>2</sub> 358.18, found 358.04.

**Bis(4-fluorobenzyl) disulfide (2f)** <sup>9</sup>

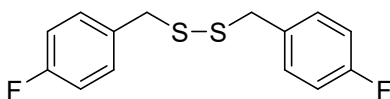

Following general **procedure B** on 3.0 mmol scale. The title compound (0.38 g, 90%) was obtained through silica gel column chromatography (100% petroleum ether) as a white solid, **mp.** 55.3 – 56.6 °C. **<sup>1</sup>H NMR** (400 MHz, CDCl<sub>3</sub>) δ 7.22 (dd, *J* = 8.6, 5.6 Hz, 4H), 7.06 – 7.00 (m, 4H), 3.61 (s, 4H); **<sup>13</sup>C NMR** (101 MHz, CDCl<sub>3</sub>) δ 162.37 (d, *J* = 246.2 Hz), 133.32 (d, *J* = 3.3 Hz), 131.11 (d, *J* = 8.0 Hz), 115.54 (d, *J* = 21.5 Hz), 42.50; **<sup>19</sup>F NMR** (376 MHz, CDCl<sub>3</sub>) δ -114.30. **GC-MS** (EI) *m/z*: [M] calcd. for C<sub>14</sub>H<sub>12</sub>F<sub>2</sub>S<sub>2</sub> 282.03, found 282.00.

#### Bis(4-chlorobenzyl) disulfide (2g)<sup>9</sup>

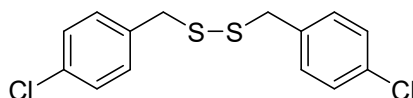

Following general **procedure B** on 3.0 mmol scale. The title compound (0.43 g, 91%) was obtained through silica gel column chromatography (100% petroleum ether) as a white solid, **mp.** 61.5 – 63.3 °C. **<sup>1</sup>H NMR** (400 MHz, CDCl<sub>3</sub>) δ 7.32 (d, *J* = 6.4 Hz, 4H), 7.18 (d, *J* = 8.0 Hz, 4H), 3.61 (s, 4H); **<sup>13</sup>C NMR** (101 MHz, CDCl<sub>3</sub>) δ 135.80, 133.26, 130.64, 128.61, 42.36. **GC-MS** (EI) *m/z*: [M] calcd. for C<sub>14</sub>H<sub>12</sub>Cl<sub>2</sub>S<sub>2</sub> 313.98, found 313.97.

#### Bis(4-bromobenzyl) disulfide (2h)<sup>9</sup>

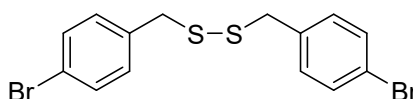

Following general **procedure B** on 3.0 mmol scale. The title compound (0.57 g, 94%) was obtained through silica gel column chromatography (100% petroleum ether) as a reddish solid, **mp.** 77.9 – 80.3 °C. **<sup>1</sup>H NMR** (400 MHz, CDCl<sub>3</sub>) δ 7.45 (d, *J* = 8.2 Hz, 4H), 7.09 (d, *J* = 8.4 Hz, 4H), 3.56 (s, 4H); **<sup>13</sup>C NMR** (101 MHz, CDCl<sub>3</sub>) δ 136.36, 131.69, 131.08, 121.54, 42.56. **GC-MS** (EI) *m/z*: [M] calcd. for C<sub>14</sub>H<sub>12</sub>Br<sub>2</sub>S<sub>2</sub> 403.87, found 403.79.

#### Bis(3-trifluoromethylbenzyl) disulfide (2i)<sup>12</sup>

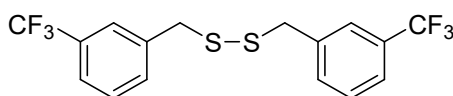

Following general **procedure B** on 3.0 mmol scale. The title compound (0.49 g, 85%) was obtained through silica gel column chromatography (100% petroleum ether) as yellow oil. **<sup>1</sup>H NMR** (400 MHz, CDCl<sub>3</sub>) δ 7.55 (d, *J* = 7.6 Hz, 2H), 7.50 – 7.38 (m, 6H), 3.61 (s, 4H); **<sup>13</sup>C NMR** (101 MHz, CDCl<sub>3</sub>) δ 138.31, 132.69, 131.10, 130.78, 129.05, 126.07 (q, *J* = 3.8 Hz), 125.35, 124.34 (q, *J* = 3.8 Hz), 122.64, 119.93, 42.48; **<sup>19</sup>F NMR** (376 MHz, CDCl<sub>3</sub>) δ -62.55. **HRMS** (ESI-TOF) *m/z*: [M+H]<sup>+</sup> calcd. for C<sub>16</sub>H<sub>13</sub>F<sub>6</sub>S<sub>2</sub> 383.0363, found 383.0336.

#### Bis(3-pyridylmethyl) disulfide (2j)

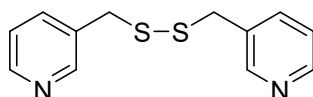

Following general **procedure B** on 3.0 mmol scale. The title compound (0.35 g, 95%) was obtained through silica gel column chromatography (ethyl acetate: petroleum ether = 1:2) as brown oil. **<sup>1</sup>H NMR** (400 MHz, CDCl<sub>3</sub>) δ 8.48 (d, J = 3.2 Hz, 2H), 8.40 (d, J = 2.2 Hz, 2H), 7.52 (dt, J = 7.8, 1.8 Hz, 2H), 7.25 – 7.21 (m, 2H), 3.53 (s, 4H); **<sup>13</sup>C NMR** (101 MHz, CDCl<sub>3</sub>) δ 150.30, 148.86, 136.84, 133.03, 123.60, 40.10. **HRMS** (ESI-TOF) m/z: [M+H]<sup>+</sup> calcd. for C<sub>12</sub>H<sub>13</sub>N<sub>2</sub>S<sub>2</sub> 249.0520, found 249.0482.

### Difurfuryl disulfide (2k) <sup>13</sup>

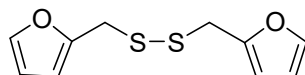

Following general **procedure B** on 3.0 mmol scale. The title compound (0.29 g, 87%) was obtained through silica gel column chromatography (100% petroleum ether) as light yellow oil. **<sup>1</sup>H NMR** (400 MHz, CDCl<sub>3</sub>) δ 7.40 (dd, J = 1.8, 1.0 Hz, 2H), 6.35 (dd, J = 3.2, 1.8 Hz, 2H), 6.24 (d, J = 3.2 Hz, 2H), 3.69 (s, 4H); **<sup>13</sup>C NMR** (101 MHz, CDCl<sub>3</sub>) δ 150.21, 142.52, 110.85, 109.06, 35.65. **GC-MS** (EI) m/z: [M] calcd. for C<sub>10</sub>H<sub>10</sub>O<sub>2</sub>S<sub>2</sub> 226.01, found 225.98.

### Bis(2-phenylethyl) disulfide (2l) <sup>14</sup>

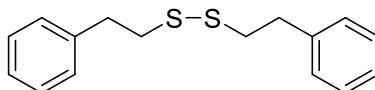

Following general **procedure B** on 3.0 mmol scale. The title compound (0.37 g, 90%) was obtained through silica gel column chromatography (ethyl acetate: petroleum ether = 1:100) as colorless oil. **<sup>1</sup>H NMR** (400 MHz, CDCl<sub>3</sub>) δ 7.38 (t, J = 7.2 Hz, 4H), 7.34 – 7.22 (m, 6H), 3.15 – 3.05 (m, 4H), 3.05 – 2.95 (m, 4H); **<sup>13</sup>C NMR** (101 MHz, CDCl<sub>3</sub>) δ 140.21, 128.81, 128.71, 126.61, 40.39, 35.92. **GC-MS** (EI) m/z: [M] calcd. for C<sub>16</sub>H<sub>18</sub>S<sub>2</sub> 274.08, found 274.06.

### Diisobutyl disulfide (2m) <sup>15</sup>

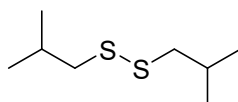

Following general **procedure B** on 3.0 mmol scale. The title compound (0.21 g, 78%) was obtained through vacuum distillation as colorless oil. **<sup>1</sup>H NMR** (400 MHz, CDCl<sub>3</sub>) δ 2.56 (d, J = 6.8 Hz, 4H), 1.96 – 1.86 (m, 2H), 0.97 (d, J = 6.8 Hz, 12H); **<sup>13</sup>C NMR** (101 MHz, CDCl<sub>3</sub>) δ 48.60, 28.24, 21.84. **GC-MS** (EI) m/z: [M] calcd. for C<sub>8</sub>H<sub>18</sub>S<sub>2</sub> 178.08, found 178.11.

### Butyl disulfide (2n) <sup>9</sup>

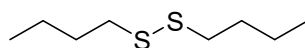

Following general **procedure B** on 3.0 mmol scale. The title compound (0.22 g, 82%) was obtained through vacuum distillation as colorless oil. **<sup>1</sup>H NMR** (400 MHz, CDCl<sub>3</sub>) δ 2.69 – 2.63 (m, 4H), 1.64 (dt, J = 15.2, 7.2 Hz, 4H), 1.39 (dq, J = 14.6, 7.2 Hz, 4H), 0.93 – 0.86 (m, 6H); **<sup>13</sup>C NMR** (101 MHz, CDCl<sub>3</sub>) δ 38.92 (s, 1H), 31.38 (s, 1H), 21.73 (s, 0H), 13.76 (s, 0H). **GC-MS** (EI) m/z: [M] calcd. for C<sub>8</sub>H<sub>18</sub>S<sub>2</sub> 178.08, found 178.11.

## Synthesis of Thioamides from Disulfides

### General Procedure C

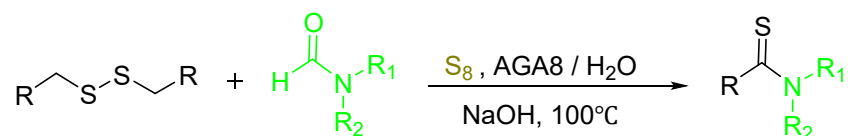

To a Schlenk tube were added the synthesized disulfides (1.0 mmol), elemental sulfur (0.05 g, 1.5 mmol), NaOH (0.08 g, 2.0 mmol) and formamide (2.0 mmol) in 1.5 wt% AGA8 aqueous solution (2 mL). The mixture was stirred at 100°C for 6 h, and monitored by TLC and HPLC. When the reaction was finished, the mixture was cooled to rt, quenched by H<sub>2</sub>O (2 mL) and extracted with ethyl acetate (2 mL×3). Then the combined extract was washed with saturated aqueous NaCl (2 mL×3), dried over anhydrous sodium sulfate and concentrated under vacuum. Purification by column chromatography on silica gel affords product thioamide.

### Characterization Data

#### **N,N-Dimethylbenzothioamide (1a)**

Following general **procedure C** on 1.0 mmol scale. The title compound (0.30 g, 90 %) was obtained through silica gel column chromatography (ethyl acetate: petroleum ether = 1:15) as a yellow solid.

#### **N,N,3-Trimethylbenzothioamide (1b)**

Following general **procedure C** on 1.0 mmol scale. The title compound (0.28 g, 78%) was obtained through silica gel column chromatography (ethyl acetate: petroleum ether = 1: 20) as bright yellow oil.

#### **N,N,4-Trimethylbenzothioamide (1c)**

Following general **procedure C** on 1.0 mmol scale. The title compound (0.30 g, 78%) was obtained through silica gel column chromatography (ethyl acetate: petroleum ether = 1:15) as a bright yellow solid.

#### **3-Methoxy-N,N-dimethylbenzothioamide (1d)**

Following general **procedure C** on 1.0 mmol scale. The title compound (0.31 g, 80%) was obtained through silica gel column chromatography (ethyl acetate: petroleum ether = 1:15) as bright yellow oil.

#### **4-tert-Butyl-N,N-dimethylbenzothioamide (1e)**

Following general **procedure C** on 1.0 mmol scale. The title compound (0.34 g, 76%) was obtained through silica gel column chromatography (ethyl acetate: petroleum ether = 1:10) as a brown yellow solid.

#### **4-Fluoro-N,N-dimethylbenzothioamide (1f)**

Following general **procedure C** on 1.0 mmol scale. The title compound (0.25 g, 68%) was obtained through silica gel column chromatography (ethyl acetate: petroleum ether = 1:15) as a yellow solid.

#### **4-Chloro-N,N-dimethylbenzothioamide (1g)**

Following general **procedure C** on 1.0 mmol scale. The title compound (0.32 g, 81%) was obtained through silica gel column chromatography (ethyl acetate: petroleum ether = 1:15) as a yellow solid.

#### **4-Bromo-N,N-dimethylbenzothioamide (1h)**

Following general **procedure C** on 1.0 mmol scale. The title compound (0.40 g, 83%) was obtained through silica gel column chromatography (ethyl acetate: petroleum ether = 1:15) as a yellow solid.

#### **N,N-Dimethyl-3-(trifluoromethyl)benzothioamide (1i)**

Following general **procedure C** on 1.0 mmol scale. The title compound (0.38 g, 81 %) was obtained through silica gel column chromatography (ethyl acetate: petroleum ether = 1: 20) as bright yellow oil.

#### **N,N-Dimethylfuran-2-carbothioamide (1j)**

Following general **procedure C** on 1.0 mmol scale. The title compound (0.20 g, 65%) was obtained through silica gel column chromatography (ethyl acetate: petroleum ether = 1:15) as a black solid.

#### **N,N-Dimethylpyridine-3-carbothioamide (1k)**

Following general **procedure C** on 1.0 mmol scale. The title compound (0.31 g, 92%) was obtained through silica gel column chromatography (ethyl acetate: petroleum ether = 1: 3) as yellow oil.

#### **Thiobenzmorpholid (1l)**

Following general **procedure C** on 1.0 mmol scale. The title compound (0.37 g, 89%) was obtained through silica gel column chromatography (ethyl acetate: petroleum ether = 1:15) as a bright yellow solid.

#### **N-Thiobenzoylpiperidine (1m)**

Following general **procedure C** on 1.0 mmol scale. The title compound (0.33 g, 81%) was obtained through silica gel column chromatography (ethyl acetate: petroleum ether = 1:15) as a brown yellow solid.

#### **N,N-Dimethylbutanethioamide (1n)**

Following general **procedure C** on 1.0 mmol scale. The title compound (0.18 g, 69%) was obtained through silica gel column chromatography (ethyl acetate: petroleum ether =1: 20) as light yellow oil.

#### **N,N,2-Trimethylpropanethioamide (1o)**

Following general **procedure C** on 1.0 mmol scale. The title compound (0.17 g, 64%) was obtained through silica gel column chromatography (ethyl acetate: petroleum ether =1: 20) as light yellow oil.

#### **4-Thiobutyl-morpholine (1p)**

Following general **procedure C** on 1.0 mmol scale. The title compound (0.24 g, 69%) was obtained through silica gel column chromatography (ethyl acetate: petroleum ether =1: 20) as brown black oil.

#### **N,N-Dimethyl-2-phenylethanethioamide (1q)**

Following general **procedure C** on 1.0 mmol scale. The title compound (0.28 g, 78%) was obtained through silica gel column chromatography (ethyl acetate: petroleum ether =1: 10) as a light yellow solid.

### **Optimized Coordinates of Key Structures**

**R0** (frequency: 1 (24.99); single-point energy: -669.384391 Hartree)

0 1

|   |             |             |             |
|---|-------------|-------------|-------------|
| C | 0.65411800  | 1.20723100  | 0.26136000  |
| C | -0.02465800 | 0.00016800  | 0.48365600  |
| C | 0.65389000  | -1.20707900 | 0.26163700  |
| C | 1.98544700  | -1.20875000 | -0.15855400 |
| C | 2.65543100  | -0.00018100 | -0.36922300 |
| C | 1.98568600  | 1.20855700  | -0.15882300 |
| H | 0.12977700  | 2.15361700  | 0.41828200  |
| H | 0.12935900  | -2.15332200 | 0.41879200  |
| H | 2.50240800  | -2.15738200 | -0.32253700 |
| H | 3.69776200  | -0.00033700 | -0.69691100 |
| H | 2.50280800  | 2.15706800  | -0.32299500 |
| C | -1.47011400 | 0.00033300  | 0.90219400  |
| H | -1.70130100 | 0.89392500  | 1.49940900  |
| H | -1.70130500 | -0.89285700 | 1.49999800  |
| S | -2.52977400 | -0.00014100 | -0.61597200 |
| H | -3.72191900 | -0.00012600 | 0.02803300  |

**IM1** (frequency: 1 (-60.67); single-point energy: -1337.569866 Hartree)

0 1

|   |             |             |             |
|---|-------------|-------------|-------------|
| C | -4.11473200 | 1.20778400  | -0.27803100 |
| C | -3.44586000 | -0.00056000 | -0.52303600 |
| C | -4.11489800 | -1.20846400 | -0.27634100 |
| C | -5.43130500 | -1.20912500 | 0.18878600  |
| C | -6.09298200 | 0.00028500  | 0.42079900  |



|   |             |             |             |
|---|-------------|-------------|-------------|
| C | -5.43113400 | 1.20928000  | 0.18709500  |
| H | -3.59425500 | 2.15284600  | -0.45366200 |
| H | -3.59455900 | -2.15384600 | -0.45065600 |
| H | -5.94287900 | -2.15721000 | 0.37139400  |
| H | -7.12357300 | 0.00061000  | 0.78371600  |
| H | -5.94257600 | 2.15769100  | 0.36837300  |
| C | -2.01445600 | -0.00098200 | -0.98588900 |
| H | -1.78408400 | 0.89337400  | -1.58355200 |
| H | -1.78404700 | -0.89644200 | -1.58187500 |
| C | 2.01449300  | 0.00110400  | 0.98599100  |
| H | 1.78438500  | 0.89645200  | 1.58226000  |
| H | 1.78381400  | -0.89336700 | 1.58336200  |
| C | 3.44589100  | 0.00040100  | 0.52312100  |
| C | 4.11546800  | 1.20819000  | 0.27733500  |
| C | 4.11417900  | -1.20805900 | 0.27707700  |
| C | 5.43182800  | 1.20861500  | -0.18792800 |
| H | 3.59559300  | 2.15367400  | 0.45248000  |
| C | 5.43053300  | -1.20979100 | -0.18817900 |
| H | 3.59327800  | -2.15301900 | 0.45199700  |
| C | 6.09291700  | -0.00091400 | -0.42098400 |
| H | 5.94382200  | 2.15660900  | -0.36982700 |
| H | 5.94151600  | -2.15829300 | -0.37027400 |
| H | 7.12346900  | -0.00142700 | -0.78401300 |
| S | -0.94195400 | 0.00050400  | 0.51073300  |
| S | 0.94198300  | 0.00048200  | -0.51064700 |

**IM2** (frequency: 1 (14.80); single-point energy: -1413.356281 Hartree)

-1 1

|   |             |             |             |
|---|-------------|-------------|-------------|
| C | -1.57483900 | -1.35504700 | 0.44252100  |
| H | -1.96725100 | -2.38279300 | 0.49048900  |
| H | -1.05669500 | -1.01507000 | 1.37412200  |
| C | -2.64450400 | -0.35037600 | 0.11437100  |
| C | -3.70102100 | -0.63419100 | -0.76476700 |
| C | -2.55861400 | 0.92788300  | 0.69970000  |
| C | -4.66708500 | 0.33457800  | -1.05533100 |
| H | -3.76364900 | -1.62533000 | -1.22538400 |
| C | -3.52804800 | 1.88973700  | 0.40769700  |
| H | -1.71106300 | 1.07743400  | 1.39859600  |
| C | -4.58161000 | 1.60157400  | -0.46957400 |
| H | -5.48749600 | 0.10118000  | -1.74119500 |
| H | -3.46389700 | 2.88047600  | 0.86947000  |

|   |             |             |             |
|---|-------------|-------------|-------------|
| H | -5.33537900 | 2.36219700  | -0.69668100 |
| S | -0.29730100 | -1.28858700 | -0.90189100 |
| O | -0.12967200 | 0.29378800  | 2.30833500  |
| H | -0.22981900 | 0.41316200  | 3.26513200  |
| C | 2.08964400  | -1.17961400 | 1.05976800  |
| H | 2.86673300  | -1.80169000 | 1.53874800  |
| C | 2.67439400  | 0.01923300  | 0.36890900  |
| C | 3.79325900  | -0.06736700 | -0.47425000 |
| C | 2.05395300  | 1.26559100  | 0.56742000  |
| C | 4.29971800  | 1.07056300  | -1.10549100 |
| H | 4.25979400  | -1.04266500 | -0.64656200 |
| C | 2.56485500  | 2.40124100  | -0.07020000 |
| H | 1.18306600  | 1.27337900  | 1.25272800  |
| C | 3.68340400  | 2.31189000  | -0.90508900 |
| H | 5.17390800  | 0.99105300  | -1.75953500 |
| H | 2.07908300  | 3.37022800  | 0.08377800  |
| H | 4.07539800  | 3.20469100  | -1.40274100 |
| S | 1.27683200  | -2.38252400 | -0.09530000 |
| H | 1.32110100  | -0.83294100 | 1.79330200  |

**TS2/3** (Number of imaginary frequency: 1 (-106.59); single-point energy: -1413.345144 Hartree)

-1 1

|   |             |             |             |
|---|-------------|-------------|-------------|
| C | 0.96975600  | -1.70677100 | 0.36781400  |
| H | 1.41312500  | -2.68898800 | 0.60321900  |
| H | 0.59472600  | -1.76499900 | -0.78082200 |
| C | 2.02217100  | -0.64207500 | 0.33217400  |
| C | 2.13404600  | 0.42733800  | 1.23659700  |
| C | 2.93243600  | -0.68774400 | -0.74698700 |
| C | 3.12790100  | 1.40047700  | 1.08680900  |
| H | 1.41782200  | 0.50691600  | 2.05711600  |
| C | 3.92955200  | 0.27617900  | -0.88986300 |
| H | 2.78594100  | -1.46884100 | -1.49771700 |
| C | 4.03854100  | 1.32794900  | 0.02936200  |
| H | 3.18849500  | 2.22356900  | 1.80579700  |
| H | 4.61785900  | 0.22139200  | -1.73942200 |
| H | 4.81654100  | 2.08838000  | -0.08636200 |
| S | -0.40642700 | -1.36196600 | 1.50896800  |
| O | 0.30708900  | -1.74801800 | -2.25537800 |
| H | 0.67727800  | -0.94459200 | -2.64866400 |
| C | -2.27080300 | -0.98238200 | -0.98278200 |
| H | -3.27975200 | -1.22869200 | -1.35462800 |
| C | -2.12816200 | 0.46965900  | -0.65320100 |

|   |             |             |             |
|---|-------------|-------------|-------------|
| C | -3.17124900 | 1.23545200  | -0.11039200 |
| C | -0.87276700 | 1.07260000  | -0.83456200 |
| C | -2.96959600 | 2.57391900  | 0.23332300  |
| H | -4.14593300 | 0.76668900  | 0.05670800  |
| C | -0.66508900 | 2.40742900  | -0.48177300 |
| H | -0.08029000 | 0.45435000  | -1.25983100 |
| C | -1.71276000 | 3.16418900  | 0.05130700  |
| H | -3.79334000 | 3.15998600  | 0.65264000  |
| H | 0.32640900  | 2.84931300  | -0.61242500 |
| H | -1.55213400 | 4.20973900  | 0.33099100  |
| S | -2.10354900 | -2.08226300 | 0.51453700  |
| H | -1.46771900 | -1.30972000 | -1.68661300 |

**IM3** (frequency: 1 (16.06); single-point energy: -1413.385041 Hartree)

-1 1

|   |             |             |             |
|---|-------------|-------------|-------------|
| C | -1.77575900 | -1.23778300 | -1.10068900 |
| H | -2.58976000 | -1.97555900 | -1.04152500 |
| H | -0.85054600 | -2.75815800 | 1.47927300  |
| C | -2.11476600 | 0.09158500  | -0.61925300 |
| C | -1.17632400 | 1.15333000  | -0.56821600 |
| C | -3.43333100 | 0.38262800  | -0.18669000 |
| C | -1.53577000 | 2.41543500  | -0.11073300 |
| H | -0.15508500 | 0.94971800  | -0.89200600 |
| C | -3.79093400 | 1.65198400  | 0.26686600  |
| H | -4.18058800 | -0.41706000 | -0.20736200 |
| C | -2.84711500 | 2.68438900  | 0.31186400  |
| H | -0.77590100 | 3.20219400  | -0.07591600 |
| H | -4.81864400 | 1.83650000  | 0.59638400  |
| H | -3.12452100 | 3.67813500  | 0.67430700  |
| S | -0.27141700 | -1.74236000 | -1.59599000 |
| O | -1.66209400 | -2.38840400 | 1.88757000  |
| H | -1.96551800 | -1.80269500 | 1.17787600  |
| C | 1.28334300  | -1.09761200 | 1.30889800  |
| H | 1.82533000  | -1.35931400 | 2.23738300  |
| C | 1.97246300  | 0.09099300  | 0.67544900  |
| C | 2.83566200  | -0.03470200 | -0.42047700 |
| C | 1.74553300  | 1.37436100  | 1.19828100  |
| C | 3.46231300  | 1.08638900  | -0.97055300 |
| H | 2.97764800  | -1.03184100 | -0.84253000 |
| C | 2.36949500  | 2.49819000  | 0.65242600  |
| H | 1.04646200  | 1.49145600  | 2.03097500  |
| C | 3.23414400  | 2.35896100  | -0.43809200 |

|   |            |             |             |
|---|------------|-------------|-------------|
| H | 4.12472400 | 0.96695100  | -1.83319200 |
| H | 2.16780600 | 3.48886800  | 1.07054300  |
| H | 3.71593900 | 3.23753300  | -0.87681600 |
| S | 1.16237800 | -2.63860200 | 0.33190500  |
| H | 0.27029800 | -0.81298700 | 1.63291600  |

**IM4** (frequency: 1 (43.38); single-point energy: -802.62624 Hartree)

-1 1

|   |             |             |             |
|---|-------------|-------------|-------------|
| C | 0.92554800  | 0.83729900  | 0.77943100  |
| C | 0.45428000  | 0.13307800  | -0.34416900 |
| C | 1.39079900  | -0.59226200 | -1.09712600 |
| C | 2.75009400  | -0.61036800 | -0.75605200 |
| C | 3.19794400  | 0.07986900  | 0.37090900  |
| C | 2.27099400  | 0.80189500  | 1.14026900  |
| H | 0.19889900  | 1.45803400  | 1.30963400  |
| H | 1.04444300  | -1.14526500 | -1.97672400 |
| H | 3.46055500  | -1.16856300 | -1.37533200 |
| H | 4.25770000  | 0.06815500  | 0.64472300  |
| H | 2.61211300  | 1.35604000  | 2.02130300  |
| C | -1.03598800 | 0.11229400  | -0.69324000 |
| H | -1.10420900 | -0.28156600 | -1.72675700 |
| S | -1.77350200 | 1.76475100  | -0.61054400 |
| C | -1.29893600 | -2.26915600 | -0.07987100 |
| H | -1.20042600 | -2.48001500 | -1.15972200 |
| H | -0.31085600 | -2.50575900 | 0.38816800  |
| H | -2.03252100 | -2.98534400 | 0.33861700  |
| C | -1.99747300 | -0.59405600 | 1.49604800  |
| H | -2.29616000 | 0.46712400  | 1.52909700  |
| H | -2.81427600 | -1.22437600 | 1.89928900  |
| H | -1.11168900 | -0.74088200 | 2.16274300  |
| N | -1.75301500 | -0.92073800 | 0.11663900  |

**IM5(S<sub>1</sub>)** (frequency: 1 (27.22); single-point energy: -1200.733269 Hartree)

-1 1

|   |             |             |             |
|---|-------------|-------------|-------------|
| C | -2.01488900 | 0.96236200  | -0.47232800 |
| C | -1.09747800 | -0.06357900 | -0.18462500 |
| C | -1.60788100 | -1.33190800 | 0.13519400  |
| C | -2.98584500 | -1.56393000 | 0.17100000  |
| C | -3.88748700 | -0.53412900 | -0.11229500 |
| C | -3.39202200 | 0.73296400  | -0.43638600 |

|   |             |             |             |
|---|-------------|-------------|-------------|
| H | -1.61229900 | 1.94463800  | -0.72631400 |
| H | -0.89066400 | -2.12315400 | 0.36302100  |
| H | -3.35777500 | -2.56129500 | 0.42510300  |
| H | -4.96593300 | -0.71643400 | -0.08158500 |
| H | -4.08451800 | 1.54940500  | -0.66491200 |
| C | 0.40245700  | 0.19804300  | -0.29962700 |
| N | 0.69928200  | 1.61173800  | -0.09445100 |
| C | 0.54387300  | 2.04108500  | 1.28283100  |
| H | 0.66757300  | 3.13624400  | 1.34498900  |
| H | -0.46409700 | 1.79048200  | 1.64929800  |
| H | 1.27787600  | 1.55572500  | 1.95865000  |
| C | 1.98979000  | 2.01309000  | -0.63412100 |
| H | 2.84380900  | 1.53265600  | -0.11972800 |
| H | 2.06251800  | 1.70946500  | -1.68951000 |
| H | 2.08180800  | 3.11342100  | -0.57035200 |
| S | 1.43950600  | -0.99928100 | 0.71462700  |
| S | 3.13067900  | -1.30558900 | -0.50225500 |
| H | 0.72065200  | -0.05939800 | -1.32332100 |

**IM5(S<sub>2</sub>)** (frequency: 1 (33.61); single-point energy: -1598.840482 Hartree)

-1 1

|   |             |             |             |
|---|-------------|-------------|-------------|
| C | 1.56338400  | -1.35454800 | 0.35986500  |
| C | 1.34789000  | -0.01207600 | 0.00283500  |
| C | 2.44110000  | 0.77043600  | -0.39011800 |
| C | 3.72983900  | 0.22714400  | -0.42113200 |
| C | 3.94072600  | -1.10563600 | -0.05727800 |
| C | 2.84930200  | -1.89341200 | 0.33330400  |
| H | 0.69499200  | -1.95990500 | 0.63892400  |
| H | 2.25318400  | 1.81112500  | -0.66265100 |
| H | 4.57503800  | 0.84942700  | -0.73178600 |
| H | 4.94836100  | -1.53125500 | -0.07942900 |
| H | 3.00465900  | -2.93895500 | 0.61579800  |
| C | -0.06492600 | 0.52921700  | 0.02163300  |
| N | -0.09561100 | 1.98522400  | 0.23466400  |
| C | 0.26331600  | 2.28935900  | 1.60865200  |
| H | 1.23751000  | 1.84360000  | 1.85941100  |
| H | 0.34521500  | 3.38177300  | 1.74334800  |
| H | -0.48214800 | 1.90782900  | 2.34291600  |
| C | -1.34253600 | 2.63654400  | -0.12470300 |
| H | -1.22611500 | 3.72654500  | 0.00771500  |
| H | -1.58070000 | 2.42668500  | -1.17478500 |

|   |             |             |             |
|---|-------------|-------------|-------------|
| H | -2.20752600 | 2.29509700  | 0.48304700  |
| S | -0.88916200 | -0.08492200 | -1.49645100 |
| S | -2.85225900 | -0.62706200 | -0.59230800 |
| S | -2.42351700 | -1.67671900 | 1.11934700  |
| H | -0.62274700 | -0.01145900 | 0.82707900  |

**IM5(S<sub>3</sub>)** (frequency: 1 (16.05); single-point energy: -1996.945763 Hartree)

-1 1

|   |             |             |             |
|---|-------------|-------------|-------------|
| C | 2.80577900  | 0.39224700  | 0.78201100  |
| C | 1.75208500  | -0.13644000 | 0.01967100  |
| C | 1.99087500  | -1.31183900 | -0.71348200 |
| C | 3.24698100  | -1.92151600 | -0.70044600 |
| C | 4.29534300  | -1.37197800 | 0.04404300  |
| C | 4.06502500  | -0.21320800 | 0.78990400  |
| H | 2.60782700  | 1.27832900  | 1.38637100  |
| H | 1.17285300  | -1.74117700 | -1.29342900 |
| H | 3.40635100  | -2.83740000 | -1.27674500 |
| H | 5.28014800  | -1.84779800 | 0.04912700  |
| H | 4.86985900  | 0.22089700  | 1.39075200  |
| C | 0.36843800  | 0.49564800  | 0.07499800  |
| N | 0.36938200  | 1.80754600  | 0.65166900  |
| C | 0.91924700  | 2.86228200  | -0.17024500 |
| H | 1.10548400  | 3.75719800  | 0.44856300  |
| H | 1.87542200  | 2.54894600  | -0.61622700 |
| H | 0.24143800  | 3.14646600  | -1.00261500 |
| C | -0.84675500 | 2.20523200  | 1.34416300  |
| H | -1.60550000 | 2.63584500  | 0.66068700  |
| H | -1.31150200 | 1.33017100  | 1.82452400  |
| H | -0.60221100 | 2.96426800  | 2.11117300  |
| S | -0.42092900 | 0.37060200  | -1.66293600 |
| H | -0.27499600 | -0.15638000 | 0.69200800  |
| S | -2.50034500 | 0.42772100  | -1.14297800 |
| S | -2.94239500 | -1.37649900 | -0.13723100 |
| S | -2.31964100 | -1.29399700 | 1.83317100  |

**IM5(S<sub>4</sub>)** (frequency: 1 (22.49); single-point energy: -2395.051366 Hartree)

-1 1

|   |            |             |             |
|---|------------|-------------|-------------|
| C | 3.15718400 | -0.22495400 | -0.71389900 |
| C | 2.03254900 | 0.11631500  | 0.04897600  |
| C | 2.17635300 | 1.08753900  | 1.05588400  |
| C | 3.41680000 | 1.67302700  | 1.31002900  |

|   |             |             |             |
|---|-------------|-------------|-------------|
| C | 4.54038400  | 1.30343700  | 0.56209100  |
| C | 4.40220800  | 0.35665300  | -0.45557200 |
| H | 3.03230600  | -0.93117700 | -1.53542000 |
| H | 1.29522700  | 1.38626900  | 1.62654700  |
| H | 3.50556000  | 2.43158300  | 2.09284100  |
| H | 5.51298700  | 1.76143200  | 0.76324700  |
| H | 5.26794600  | 0.07414500  | -1.06203400 |
| C | 0.66109000  | -0.46664600 | -0.24276000 |
| N | 0.62280900  | -1.38631300 | -1.33768000 |
| C | 1.03445300  | -2.74566800 | -1.07923600 |
| H | 1.93770700  | -2.76602000 | -0.45135400 |
| H | 0.25743700  | -3.33885100 | -0.55182100 |
| H | 1.26441500  | -3.25291700 | -2.03316600 |
| C | -0.51754200 | -1.27557100 | -2.23545400 |
| H | -0.24309900 | -1.68482900 | -3.22554800 |
| H | -1.40968900 | -1.81871700 | -1.86930000 |
| H | -0.79001800 | -0.21504800 | -2.34903700 |
| S | 0.04964300  | -1.14926100 | 1.42709700  |
| H | -0.01378200 | 0.38653100  | -0.47201300 |
| S | -1.97084200 | -1.51936400 | 1.09687400  |
| S | -2.98557400 | 0.40350000  | 1.20912800  |
| S | -1.35684300 | 2.22872400  | -1.20113100 |
| S | -3.07373000 | 1.20683900  | -0.72381500 |

**IM5(S<sub>5</sub>)** (frequency: 1 (20.61); single-point energy: -2793.145183 Hartree)

-1 1

|   |             |             |             |
|---|-------------|-------------|-------------|
| C | -2.95762600 | -0.74682300 | -1.13608400 |
| C | -2.29272500 | -0.10639500 | -0.08436300 |
| C | -2.91739500 | 0.99173400  | 0.53414100  |
| C | -4.17618800 | 1.42410900  | 0.11843600  |
| C | -4.83918300 | 0.76943400  | -0.92592700 |
| C | -4.22256900 | -0.31530800 | -1.55149700 |
| H | -2.46997000 | -1.58628700 | -1.63350300 |
| H | -2.38606300 | 1.49614000  | 1.34166900  |
| H | -4.64112900 | 2.28476600  | 0.60786400  |
| H | -5.82684500 | 1.10796400  | -1.25187500 |
| H | -4.72559000 | -0.83342300 | -2.37313800 |
| C | -0.89582900 | -0.46517000 | 0.39864100  |
| N | -0.81193300 | -0.46966900 | 1.82775700  |
| C | 0.53895400  | -0.33619900 | 2.34349300  |
| H | 1.01507100  | 0.55042300  | 1.90237700  |

|   |             |             |             |
|---|-------------|-------------|-------------|
| H | 0.49695100  | -0.20518400 | 3.43748000  |
| H | 1.17142600  | -1.21885600 | 2.11448000  |
| C | -1.58546000 | -1.49734800 | 2.48992900  |
| H | -1.63817100 | -1.28404400 | 3.57063500  |
| H | -2.61270200 | -1.51427000 | 2.09413900  |
| H | -1.15190000 | -2.51389800 | 2.36576100  |
| H | -0.21925000 | 0.32477400  | 0.02759200  |
| S | 3.48810000  | 0.92154000  | 0.24140800  |
| S | 2.14441600  | 1.96350300  | -0.83574600 |
| S | -0.23564600 | -2.06915900 | -0.38188600 |
| S | 1.50878500  | -1.45568700 | -1.42402700 |
| S | 3.10430900  | -1.51575200 | -0.17427700 |
| S | 0.53752500  | 2.67876600  | 0.19212800  |

**IM5(S<sub>6</sub>)** (frequency: 1 (10.63); single-point energy: -3191.243165 Hartree)

-1 1

|   |             |             |             |
|---|-------------|-------------|-------------|
| C | -2.97284200 | 0.64799200  | -1.05940900 |
| C | -2.64599300 | -0.12687700 | 0.06534600  |
| C | -3.62261800 | -0.30890800 | 1.05568500  |
| C | -4.90403600 | 0.23053400  | 0.90890800  |
| C | -5.22606900 | 0.97978700  | -0.22477100 |
| C | -4.24897800 | 1.19391200  | -1.20230900 |
| H | -2.20657700 | 0.82433600  | -1.81369800 |
| H | -3.35325400 | -0.85726200 | 1.95903200  |
| H | -5.65059300 | 0.07168300  | 1.69259400  |
| H | -6.22717600 | 1.40448600  | -0.34125600 |
| H | -4.47950500 | 1.79872800  | -2.08366200 |
| C | -1.23059000 | -0.63593500 | 0.26659200  |
| N | -1.08942000 | -1.56509400 | 1.34170700  |
| C | 0.25974800  | -1.64773200 | 1.86945800  |
| H | 0.67116800  | -0.63973200 | 2.01781000  |
| H | 0.24945700  | -2.18190300 | 2.83486700  |
| H | 0.94867400  | -2.18155600 | 1.18435000  |
| C | -1.66859200 | -2.87604400 | 1.12020500  |
| H | -1.72354600 | -3.42496100 | 2.07546000  |
| H | -2.68746200 | -2.78795000 | 0.71621900  |
| H | -1.07099000 | -3.48342600 | 0.40799600  |
| H | -0.59929000 | 0.25360300  | 0.43482400  |
| S | 3.44513200  | -0.74559800 | 0.68302000  |
| S | 3.35768000  | 1.37644200  | 0.61163900  |
| S | 1.42099100  | 2.09340800  | 1.22187800  |



|   |             |             |             |
|---|-------------|-------------|-------------|
| S | -0.55065800 | -1.29623700 | -1.40791000 |
| S | 1.20797800  | -0.20712800 | -1.71459100 |
| S | 2.88381700  | -1.42017200 | -1.26128100 |
| S | 0.19223900  | 2.53798700  | -0.33742500 |

**IM5(S<sub>7</sub>)** (frequency: 1 (20.77); single-point energy: -3589.336257 Hartree)

-1 1

|   |             |             |             |
|---|-------------|-------------|-------------|
| C | -4.01829700 | -0.90622000 | 0.01662100  |
| C | -2.94777600 | -0.00142800 | 0.04113200  |
| C | -3.20674600 | 1.36011900  | -0.18459000 |
| C | -4.51043600 | 1.80047600  | -0.42332200 |
| C | -5.57437700 | 0.89284100  | -0.43691600 |
| C | -5.32363300 | -0.46438200 | -0.21848700 |
| H | -3.83053400 | -1.97148000 | 0.17064400  |
| H | -2.36226300 | 2.05491400  | -0.21060100 |
| H | -4.69449500 | 2.86240900  | -0.60868000 |
| H | -6.59422600 | 1.24033500  | -0.62528700 |
| H | -6.14589300 | -1.18528500 | -0.23462400 |
| C | -1.51628900 | -0.39386700 | 0.34553300  |
| N | -1.19597100 | -0.28988400 | 1.72764100  |
| C | 0.22752400  | -0.29794200 | 2.00435400  |
| H | 0.73468300  | 0.43634500  | 1.36743900  |
| H | 0.40375000  | -0.01376200 | 3.05433200  |
| H | 0.69338800  | -1.28953200 | 1.82741400  |
| C | -1.96471200 | -1.10073000 | 2.64436200  |
| H | -1.73286600 | -0.80099800 | 3.67904500  |
| H | -3.04262000 | -0.95618400 | 2.48193600  |
| H | -1.74267200 | -2.18723600 | 2.55046400  |
| H | -0.84407300 | 0.26479000  | -0.23751900 |
| S | 3.59417000  | 0.34282500  | 1.01777300  |
| S | 3.13701300  | 2.25200700  | 0.08294100  |
| S | 1.11045100  | 2.80075500  | 0.17974400  |
| S | -1.16628000 | -2.14700700 | -0.40021600 |
| S | 0.52608200  | -1.93960600 | -1.56504500 |
| S | 0.06579300  | 2.23132300  | -1.47514300 |
| S | 2.19088800  | -2.53887200 | -0.34076200 |
| S | 3.70051300  | -1.11132100 | -0.50180300 |

**IM5(S<sub>8</sub>)** (frequency: 1 (10.06); single-point energy: -3987.428744 Hartree)

-1 1

|   |            |            |             |
|---|------------|------------|-------------|
| C | 4.31731800 | 0.82788000 | -0.34942800 |
|---|------------|------------|-------------|

|   |             |             |             |
|---|-------------|-------------|-------------|
| C | 3.31428500  | -0.02200700 | 0.12865900  |
| C | 3.64417600  | -1.35643800 | 0.42793200  |
| C | 4.94769500  | -1.82051400 | 0.25752000  |
| C | 5.94878500  | -0.96041300 | -0.20935600 |
| C | 5.62800900  | 0.36344500  | -0.51276600 |
| H | 4.07187600  | 1.85942000  | -0.60682100 |
| H | 2.84979100  | -2.01644700 | 0.78032400  |
| H | 5.18391300  | -2.86394700 | 0.48397200  |
| H | 6.97165200  | -1.32432300 | -0.34104200 |
| H | 6.39938600  | 1.04448000  | -0.88323200 |
| C | 1.86065800  | 0.35983900  | 0.34523100  |
| N | 1.45230800  | 0.14222400  | 1.68747400  |
| C | 0.01625800  | 0.04409600  | 1.85457300  |
| H | -0.21817800 | -0.32961400 | 2.86364800  |
| H | -0.50147200 | 1.01735400  | 1.71611300  |
| H | -0.38488700 | -0.66996600 | 1.12690800  |
| C | 2.11632500  | 0.93590200  | 2.69573400  |
| H | 3.20720200  | 0.90106100  | 2.55242000  |
| H | 1.80027000  | 2.00235500  | 2.68104700  |
| H | 1.88701400  | 0.53189100  | 3.69529700  |
| H | 1.24683400  | -0.28347100 | -0.31443700 |
| S | -2.99877100 | -1.53361700 | 1.41156900  |
| S | -2.99903600 | -2.31261300 | -0.56408700 |
| S | 1.51235200  | 2.15333400  | -0.26793400 |
| S | -0.11333400 | 1.98844800  | -1.53494500 |
| S | -1.28134700 | -1.53294400 | -1.54410200 |
| S | -1.83209200 | 2.68089600  | -0.47633700 |
| S | -3.38671600 | 1.25168700  | -0.57413100 |
| S | 0.41423300  | -2.54287300 | -1.04355200 |
| S | -3.90532800 | 0.40423800  | 1.25632600  |

**TS5/6(S<sub>1</sub>)** (Number of imaginary frequency: 1 (-1117.82); single-point energy: -1200.692858 Hartree)

-1 1

|   |            |             |             |
|---|------------|-------------|-------------|
| C | 1.84167900 | 1.00762000  | 0.55519500  |
| C | 0.93898300 | 0.03669600  | 0.03240400  |
| C | 1.52598000 | -1.17267900 | -0.43459900 |
| C | 2.89817900 | -1.39223100 | -0.36740700 |
| C | 3.76908300 | -0.42381600 | 0.15524800  |
| C | 3.21438700 | 0.77823400  | 0.61437300  |
| H | 1.42022700 | 1.94215100  | 0.93006500  |
| H | 0.86316100 | -1.93247700 | -0.85203400 |

|   |             |             |             |
|---|-------------|-------------|-------------|
| H | 3.30219300  | -2.34173200 | -0.73654900 |
| H | 4.84758400  | -0.60087100 | 0.19992000  |
| H | 3.86746400  | 1.55635400  | 1.02640100  |
| C | -0.49815200 | 0.25966200  | 0.07404100  |
| N | -0.91635700 | 1.62475500  | 0.17717000  |
| C | -0.77444200 | 2.40700500  | -1.03680100 |
| H | -0.96051100 | 3.47931200  | -0.83732500 |
| H | 0.25007700  | 2.30311600  | -1.42606600 |
| H | -1.48090200 | 2.08098600  | -1.83449700 |
| C | -2.20393500 | 1.81943200  | 0.80610600  |
| H | -3.04577900 | 1.42878900  | 0.19306800  |
| H | -2.23081800 | 1.28319300  | 1.76565400  |
| H | -2.37956900 | 2.89617800  | 0.98707000  |
| S | -1.55432300 | -0.81634400 | -1.02043900 |
| S | -2.26201900 | -1.84684500 | 0.75780100  |
| H | -1.24773100 | -0.77681600 | 1.15494300  |

**TS5/6(S<sub>2</sub>)** (Number of imaginary frequency: 1 (-961.72); single-point energy: -1598.826864 Hartree)

-1 1

|   |             |             |             |
|---|-------------|-------------|-------------|
| C | 1.48252500  | -1.34798200 | -0.18484900 |
| C | 1.26850200  | 0.04598100  | -0.20121000 |
| C | 2.38579500  | 0.88827100  | -0.05615400 |
| C | 3.67302700  | 0.35948000  | 0.08421100  |
| C | 3.87349600  | -1.02274300 | 0.09580300  |
| C | 2.76458500  | -1.87114600 | -0.03868400 |
| H | 0.61534500  | -2.00272200 | -0.29007700 |
| H | 2.22109500  | 1.96718800  | -0.07491200 |
| H | 4.52747800  | 1.03717600  | 0.18233100  |
| H | 4.87918400  | -1.43768200 | 0.21072100  |
| H | 2.90420200  | -2.95649500 | -0.02468400 |
| C | -0.11828500 | 0.59007800  | -0.35889200 |
| N | -0.25826700 | 1.97338900  | 0.06260400  |
| C | -0.20906500 | 2.16088700  | 1.50397600  |
| H | 0.64639000  | 1.61268600  | 1.92563700  |
| H | -0.07419200 | 3.23173300  | 1.73744700  |
| H | -1.12529800 | 1.79534500  | 2.01186800  |
| C | -1.32098700 | 2.73804800  | -0.55024100 |
| H | -1.24555700 | 3.78603200  | -0.20993000 |
| H | -1.23011300 | 2.70533900  | -1.64491700 |
| H | -2.33423000 | 2.35866400  | -0.30026100 |
| S | -1.04752300 | -0.03553600 | -1.65312000 |
| S | -2.76298600 | -1.49384200 | -0.25050900 |
| S | -1.81442900 | -1.03283400 | 1.50115300  |
| H | -0.77498900 | -0.16083700 | 0.71441400  |

**TS5/6(S<sub>3</sub>)** (Number of imaginary frequency: 1 (-644.38); single-point energy: -1996.914091 Hartree)

-1 1

|   |             |             |             |
|---|-------------|-------------|-------------|
| C | 2.51956200  | 0.44567400  | 0.64156500  |
| C | 1.43370300  | 0.07384400  | -0.19423500 |
| C | 1.62536900  | -1.07970600 | -0.99929000 |
| C | 2.82199600  | -1.78774400 | -0.98412000 |
| C | 3.89176100  | -1.39350900 | -0.16604700 |
| C | 3.71646100  | -0.27118100 | 0.64933100  |
| H | 2.38511600  | 1.30624700  | 1.29811300  |
| H | 0.79996300  | -1.41318500 | -1.62968500 |
| H | 2.92242900  | -2.67302200 | -1.62123900 |
| H | 4.83094500  | -1.95382300 | -0.15958400 |
| H | 4.52704800  | 0.05405600  | 1.31094000  |
| C | 0.17140400  | 0.81322900  | -0.13844400 |
| N | 0.20335400  | 2.07786100  | 0.55602700  |
| C | 0.75926700  | 3.17163300  | -0.21721500 |
| H | 0.89474600  | 4.06514600  | 0.41997700  |
| H | 1.74459500  | 2.88257100  | -0.61482600 |
| H | 0.11179000  | 3.46090800  | -1.07649700 |
| C | -1.03267700 | 2.44981100  | 1.21250400  |
| H | -1.83334600 | 2.73691000  | 0.49403900  |
| H | -1.41687000 | 1.60708100  | 1.80287500  |
| H | -0.85908300 | 3.31076000  | 1.88430300  |
| S | -0.89770500 | 0.70550900  | -1.54995500 |
| H | -0.41604700 | -0.25930100 | 1.02388300  |
| S | -2.77570100 | -0.17211700 | -0.78382900 |
| S | -2.09417500 | -1.93597200 | 0.08988100  |
| S | -1.14215900 | -1.23502400 | 1.87835500  |

**TS5/6(S<sub>4</sub>)** (Number of imaginary frequency: 1 (-304.52); single-point energy: -2395.02176 Hartree)

-1 1

|   |             |             |             |
|---|-------------|-------------|-------------|
| C | -2.89463400 | -0.05510700 | 0.66878600  |
| C | -1.81158200 | -0.02966600 | -0.24762800 |
| C | -1.87254900 | 0.95214700  | -1.27128600 |
| C | -2.95166600 | 1.82281100  | -1.38061800 |
| C | -4.02339800 | 1.76901000  | -0.47775700 |
| C | -3.97332500 | 0.82129100  | 0.54951100  |
| H | -2.85016800 | -0.77498600 | 1.48674500  |
| H | -1.04139200 | 1.02027700  | -1.97464700 |
| H | -2.95355400 | 2.56703400  | -2.18387900 |
| H | -4.86928800 | 2.45599000  | -0.56905800 |
| H | -4.78869200 | 0.76422900  | 1.27885500  |

|   |             |             |             |
|---|-------------|-------------|-------------|
| C | -0.66910900 | -0.92884300 | -0.06469800 |
| N | -0.80389400 | -1.94269600 | 0.94757500  |
| C | -1.44691000 | -3.16350500 | 0.50334300  |
| H | -2.40200800 | -2.92043800 | 0.01159000  |
| H | -0.82635600 | -3.74009700 | -0.21917500 |
| H | -1.66218600 | -3.82059600 | 1.36608100  |
| C | 0.38742500  | -2.19538500 | 1.73199800  |
| H | 0.13307600  | -2.81065300 | 2.61507000  |
| H | 1.18110100  | -2.72776400 | 1.16361100  |
| H | 0.81693900  | -1.24533300 | 2.07861700  |
| S | 0.29870700  | -1.28676300 | -1.47713100 |
| H | 0.09952200  | 0.42084400  | 0.78068800  |
| S | 2.44592600  | -0.98613100 | -1.01851500 |
| S | 2.93491400  | 1.05620900  | -0.83082000 |
| S | 0.51184400  | 1.70729500  | 1.33389600  |
| S | 2.57890600  | 1.41275400  | 1.20898100  |

**TS5/6(S<sub>5</sub>)** (Number of imaginary frequency: 1 (-602.13); single-point energy: -2793.117451 Hartree)

-1 1

|   |             |             |             |
|---|-------------|-------------|-------------|
| C | -2.62104900 | 0.11581300  | -1.47044400 |
| C | -2.21787300 | -0.19731400 | -0.14996700 |
| C | -3.04755900 | 0.26965600  | 0.89953500  |
| C | -4.21665400 | 0.98579300  | 0.63821800  |
| C | -4.60606400 | 1.27227200  | -0.67313000 |
| C | -3.78814000 | 0.83021600  | -1.72277000 |
| H | -1.98941500 | -0.21653600 | -2.29605700 |
| H | -2.73786700 | 0.06129800  | 1.92417200  |
| H | -4.83047100 | 1.33011500  | 1.47715900  |
| H | -5.52226900 | 1.83364700  | -0.87619500 |
| H | -4.06540600 | 1.05048200  | -2.75883700 |
| C | -0.95316600 | -0.87809900 | 0.16144100  |
| N | -0.82875300 | -1.38787500 | 1.51043300  |
| C | 0.52083200  | -1.43510100 | 2.03957600  |
| H | 1.00050700  | -0.45190200 | 1.95564200  |
| H | 0.48713300  | -1.71109800 | 3.10829400  |
| H | 1.16608400  | -2.17011600 | 1.51258000  |
| C | -1.54112200 | -2.63388600 | 1.72682600  |
| H | -1.56108300 | -2.88040100 | 2.80387200  |
| H | -2.58119000 | -2.53361000 | 1.37944100  |
| H | -1.08086900 | -3.49393800 | 1.18942300  |
| H | -0.27391800 | 0.58949400  | 0.37204600  |
| S | 3.32436300  | 0.90936900  | 0.79982200  |
| S | 1.94759900  | 2.17498400  | -0.01263100 |

|   |             |             |             |
|---|-------------|-------------|-------------|
| S | -0.13334500 | -1.76695000 | -1.09199900 |
| S | 1.66597900  | -0.57644600 | -1.81317000 |
| S | 3.26654100  | -0.90950800 | -0.62467300 |
| S | 0.09228800  | 1.93927500  | 0.92638300  |

**TS5/6(S<sub>6</sub>)** (Number of imaginary frequency: 1 (-531.23); single-point energy: -3191.217858 Hartree)

-1 1

|   |             |             |             |
|---|-------------|-------------|-------------|
| C | -2.95703200 | -0.10927700 | -1.38583700 |
| C | -2.57029500 | -0.22605000 | -0.02848500 |
| C | -3.42687500 | 0.36602600  | 0.93217900  |
| C | -4.60741600 | 1.00580800  | 0.55786200  |
| C | -4.98189500 | 1.09671600  | -0.78748700 |
| C | -4.13646200 | 0.53551200  | -1.75239800 |
| H | -2.30879300 | -0.54177700 | -2.14968600 |
| H | -3.12348900 | 0.32192700  | 1.97868800  |
| H | -5.24306900 | 1.44896700  | 1.33164900  |
| H | -5.90660800 | 1.60212000  | -1.07926800 |
| H | -4.39847900 | 0.60416300  | -2.81315900 |
| C | -1.29549700 | -0.83124000 | 0.38221200  |
| N | -1.10895800 | -1.02450300 | 1.80035600  |
| C | 0.25167100  | -0.85828900 | 2.26514100  |
| H | 0.65342700  | 0.11263800  | 1.94825400  |
| H | 0.27886000  | -0.90007800 | 3.36849700  |
| H | 0.94141200  | -1.63803500 | 1.87582500  |
| C | -1.72289700 | -2.23492400 | 2.31558000  |
| H | -1.69272100 | -2.23755900 | 3.42031000  |
| H | -2.77769400 | -2.27930900 | 2.00239500  |
| H | -1.21973800 | -3.16183800 | 1.95879000  |
| H | -0.54563200 | 0.62377300  | 0.05014900  |
| S | 3.47568200  | -0.27530700 | 0.66556700  |
| S | 3.25450600  | 1.67679300  | -0.05829300 |
| S | 1.44621900  | 2.41542200  | 0.78242100  |
| S | -0.54547300 | -1.98723300 | -0.68965500 |
| S | 1.17387400  | -0.96704000 | -1.75468200 |
| S | 2.97584500  | -1.56179600 | -0.98838300 |
| S | -0.16906400 | 1.99608800  | -0.42494800 |

**TS5/6(S<sub>7</sub>)** (Number of imaginary frequency: 1 (-588.77); single-point energy: -3589.311594 Hartree)

-1 1

|   |             |             |             |
|---|-------------|-------------|-------------|
| C | -3.44161400 | -0.67853800 | -1.06421800 |
| C | -2.81192800 | -0.16749600 | 0.09373100  |
| C | -3.40451200 | 0.96497300  | 0.70019600  |
| C | -4.56951600 | 1.53543900  | 0.18866300  |
| C | -5.18600200 | 1.00987700  | -0.95171600 |

|   |             |             |             |
|---|-------------|-------------|-------------|
| C | -4.60266100 | -0.10095600 | -1.57328700 |
| H | -2.99671600 | -1.54333300 | -1.55957800 |
| H | -2.90818000 | 1.39461900  | 1.57100400  |
| H | -4.99748900 | 2.41266900  | 0.68466700  |
| H | -6.09791500 | 1.46034900  | -1.35315000 |
| H | -5.05985700 | -0.52526900 | -2.47291000 |
| C | -1.54237900 | -0.70737500 | 0.61554600  |
| N | -1.16883300 | -0.27155800 | 1.94223300  |
| C | 0.25702600  | -0.22576300 | 2.19260300  |
| H | 0.76256000  | 0.35545100  | 1.41480400  |
| H | 0.45178100  | 0.26871300  | 3.16010600  |
| H | 0.72876500  | -1.23140600 | 2.21422700  |
| C | -1.88688000 | -0.95362700 | 3.00363100  |
| H | -1.67908600 | -0.47001900 | 3.97479400  |
| H | -2.97082700 | -0.89739400 | 2.81866100  |
| H | -1.60815200 | -2.02828900 | 3.09077000  |
| H | -0.70842000 | 0.27835500  | -0.35453800 |
| S | 3.49404100  | 0.88601100  | 0.80575000  |
| S | 2.72175400  | 2.52912300  | -0.25625500 |
| S | 0.62128300  | 2.64995600  | -0.03920600 |
| S | -1.04719000 | -2.30313200 | 0.14108300  |
| S | 0.67907700  | -2.19788500 | -1.33759600 |
| S | -0.22461800 | 1.31035900  | -1.35433300 |
| S | 2.43504900  | -2.29889100 | -0.22816900 |
| S | 3.72036500  | -0.67758900 | -0.60723500 |

**TS5/6(S<sub>8</sub>)** (Number of imaginary frequency: 1 (-646.22); single-point energy: -3987.400317 Hartree)

-1 1

|   |             |             |             |
|---|-------------|-------------|-------------|
| C | 3.68661300  | 0.73368300  | -1.04269100 |
| C | 3.20403100  | 0.14836400  | 0.15073800  |
| C | 3.96931800  | -0.90512300 | 0.70433900  |
| C | 5.15956300  | -1.32749900 | 0.11093400  |
| C | 5.63054100  | -0.72515900 | -1.05940200 |
| C | 4.87534200  | 0.30792000  | -1.62959200 |
| H | 3.10463100  | 1.53437400  | -1.50182700 |
| H | 3.59230000  | -1.38640300 | 1.60723300  |
| H | 5.72467500  | -2.14536900 | 0.56963100  |
| H | 6.56215300  | -1.05843300 | -1.52484700 |
| H | 5.21610800  | 0.78667600  | -2.55303800 |
| C | 1.91146700  | 0.52020000  | 0.75917600  |
| N | 1.67365600  | 0.00472200  | 2.08681700  |
| C | 0.30109600  | -0.35702500 | 2.36001200  |
| H | 0.22504600  | -0.83478200 | 3.35219500  |
| H | -0.39248800 | 0.51222200  | 2.34303400  |

|   |             |             |             |
|---|-------------|-------------|-------------|
| H | -0.05265600 | -1.07069600 | 1.60824200  |
| C | 2.27005500  | 0.79304600  | 3.14923400  |
| H | 3.33076000  | 0.98049900  | 2.92011400  |
| H | 1.77083800  | 1.77712600  | 3.29543800  |
| H | 2.21733800  | 0.24316500  | 4.10616100  |
| H | 1.15447600  | -0.56559800 | -0.18401900 |
| S | -2.75603000 | -1.43749100 | 1.31275400  |
| S | -2.41122400 | -2.57604900 | -0.41057200 |
| S | 1.26762000  | 2.10309000  | 0.40362300  |
| S | -0.27963600 | 2.01077600  | -1.21710000 |
| S | -1.08630400 | -1.44845500 | -1.61414500 |
| S | -2.16005600 | 2.52288000  | -0.46342800 |
| S | -3.58537200 | 1.01105900  | -0.89520400 |
| S | 0.86334200  | -1.79696500 | -1.02947900 |
| S | -4.24089800 | -0.00986100 | 0.80964400  |

**IM6** (frequency: 1 (41.77); single-point energy: -1598.836898 Hartree)

-1 1

|   |             |             |             |
|---|-------------|-------------|-------------|
| C | 1.30312000  | -1.25305000 | -0.44710800 |
| C | 1.25903100  | 0.15480100  | -0.31693500 |
| C | 2.44986300  | 0.81962500  | 0.05256400  |
| C | 3.63383200  | 0.11319800  | 0.26995400  |
| C | 3.66314200  | -1.27947700 | 0.13874900  |
| C | 2.48560700  | -1.95275100 | -0.21806400 |
| H | 0.37684100  | -1.77165300 | -0.71209300 |
| H | 2.43174900  | 1.90818800  | 0.14039900  |
| H | 4.54587900  | 0.65633000  | 0.53840400  |
| H | 4.58940300  | -1.83418000 | 0.31447200  |
| H | 2.48917000  | -3.04311100 | -0.31178300 |
| C | 0.01057100  | 0.89085400  | -0.59140500 |
| N | -0.16124200 | 2.10164100  | 0.12061800  |
| C | -0.07714000 | 2.04136500  | 1.57365000  |
| H | 0.77733500  | 1.42712000  | 1.88453300  |
| H | 0.06188800  | 3.05782300  | 1.98330400  |
| H | -0.98916500 | 1.58583600  | 2.00990800  |
| C | -1.23026200 | 2.96751100  | -0.32319000 |
| H | -1.13079800 | 3.94767800  | 0.17554300  |
| H | -1.17723800 | 3.09918400  | -1.41315000 |
| H | -2.23366700 | 2.55188500  | -0.09852800 |
| S | -1.07655800 | 0.31104700  | -1.70726700 |
| S | -2.54288700 | -1.76518900 | -0.31482800 |
| S | -1.94127700 | -1.03980500 | 1.53742400  |
| H | -0.62772900 | -1.40588200 | 1.57010400  |



## References

- 1 X. Ge, S. Zhang, X. Chen, X. Liu, C. Qian, *Green Chem.*, 2019, **21**, 2771.
- 2 J. Wei, Y. Li, X. Jiang, *Org. Lett.*, 2016, **18**, 340.
- 3 V. Jaiswal, B. Mondal, K. Singh, D. Das, J. Saha, *Org. Lett.*, 2019, **21**, 5848.
- 4 Y. Bian, X. Qu, Y. Chen, J. Li, L. Liu, *Molecules*, 2018, **23**.
- 5 K. Xu, Z. Li, F. Cheng, Z. Zuo, T. Wang, M. Wang, L. Liu, *Org. Lett.*, 2018, **20**, 2228.
- 6 W. Liu, C. Chen, H. Liu, *Beilstein J. Org. Chem.*, 2015, **11**, 1721.
- 7 N. D. Koduri, H. Scott, B. Hileman, J. D. Cox, M. Coffin, L. Glicksberg, S. R. Hussaini, *Org. Lett.*, 2012, **14**, 440.
- 8 Z. Chen, M. Luo, Y. Wen, G. Luo, L. Liu, *Org. Lett.*, 2014, **16**, 3020.
- 9 D. Bhattacharjee, A. Sufian, S. K. Mahato, S. Begum, K. Banerjee, S. De, H. K. Srivastava, K. P. Bhabak, *Chem. Commun. (Camb)*, 2019, **55**, 13534.
- 10 M. Mohammadzadeh, M. Abbasi, H. Moosavi, N. Saeedi, *Synlett*, 2015, **26**, 1185.
- 11 V. Sureshbabu, V. Panduranga, G. Prabhu, N. Panguluri, *Synthesis*, 2016, **48**, 1711.
- 12 H. Huang, J. Ash, J. Y. Kang, *Org. Biomol. Chem.*, 2018, **16**, 4236.
- 13 A. Talla, B. Driessen, N. J. W. Straathof, L.-G. Milroy, L. Brunsveld, V. Hessel, T. Noel, *Adv. Synth. Catal.*, 2015, **357**, 2180.
- 14 N. Spiliopoulou, C. G. Kokotos, *Green Chem.*, 2021, **23**, 546.
- 15 H. Wang, Vol. CN105294371 Zhenjiang Wei Ze Biomedical Technology Co. Ltd., China, 2016.

# NMR Spectra

## N-Octyl glucosamine (AGA8)

### <sup>1</sup>H NMR

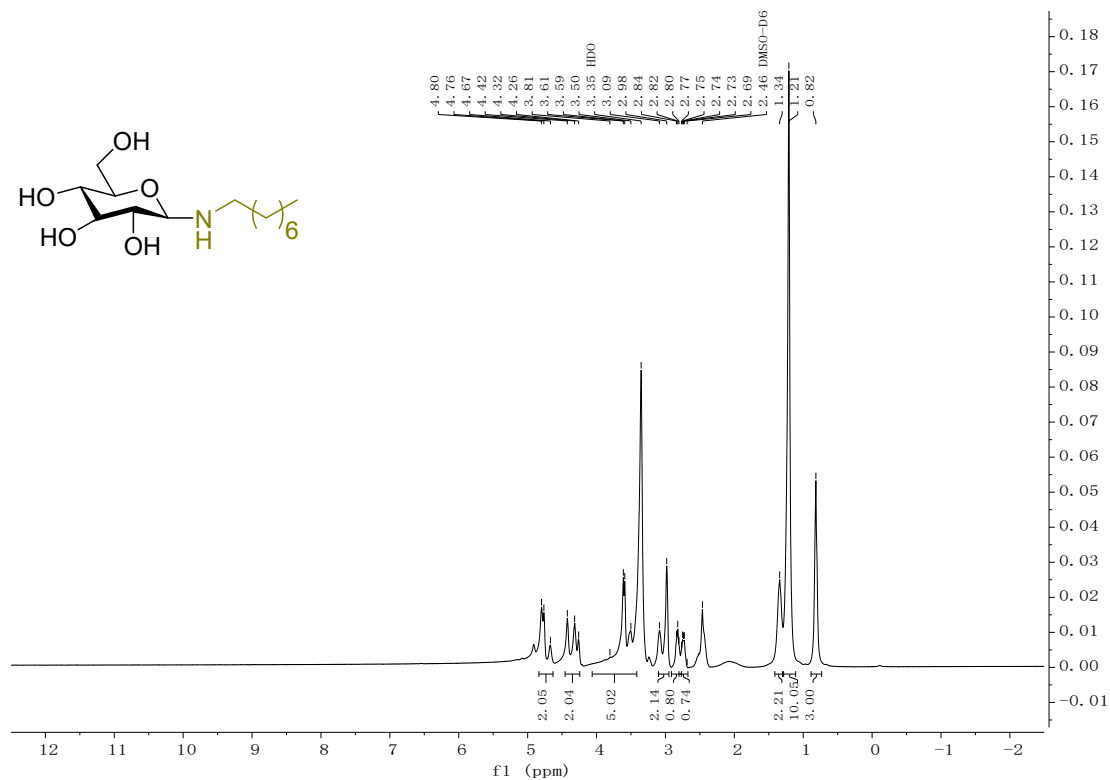

### <sup>13</sup>C NMR

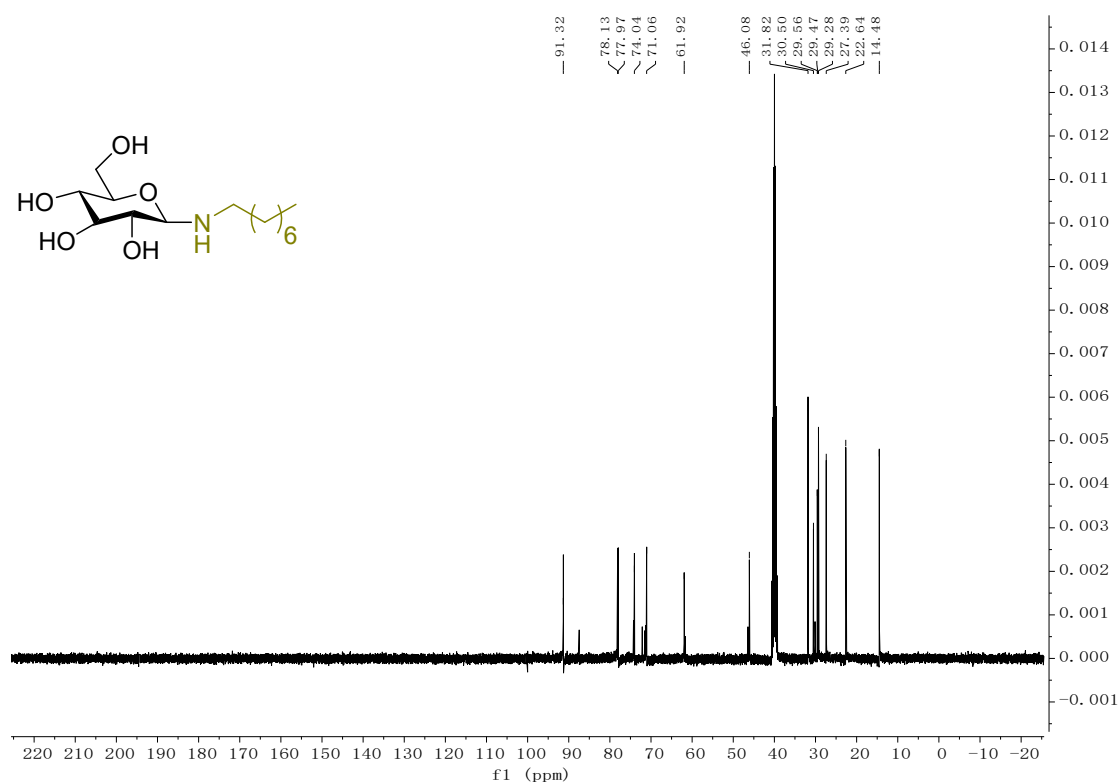

# N-Decyl glucosamine (AGA10)

## <sup>1</sup>H NMR

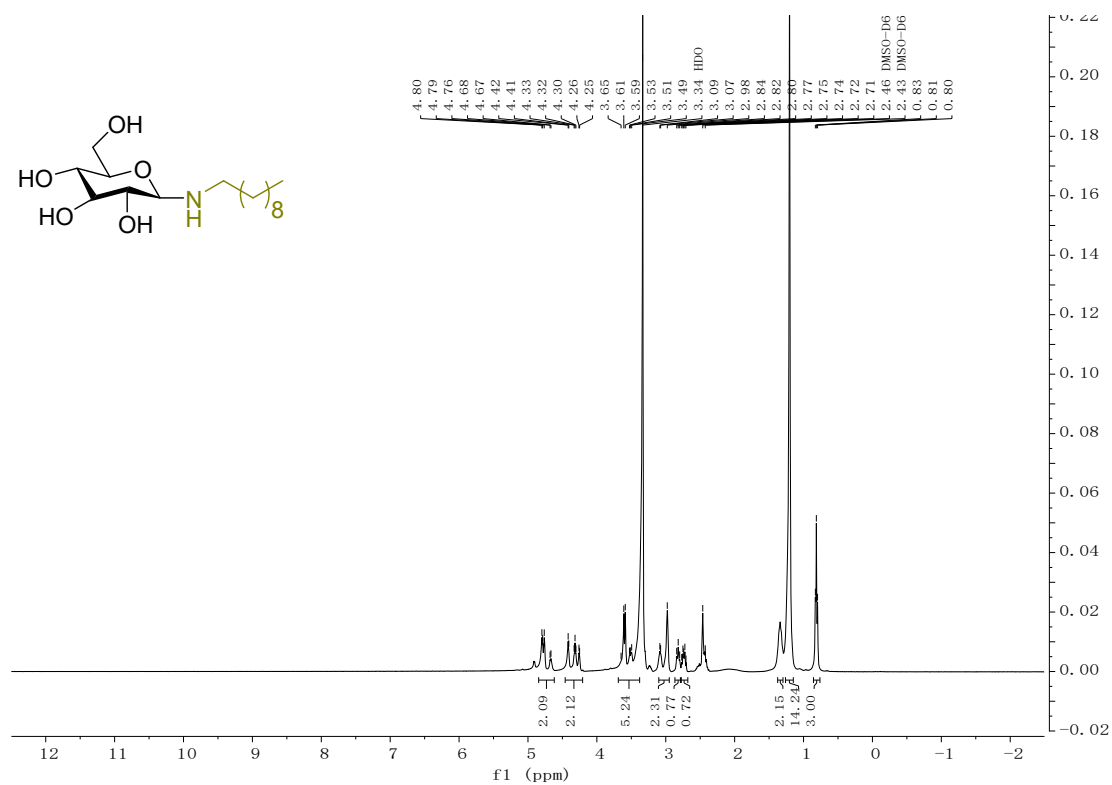

## <sup>13</sup>C NMR

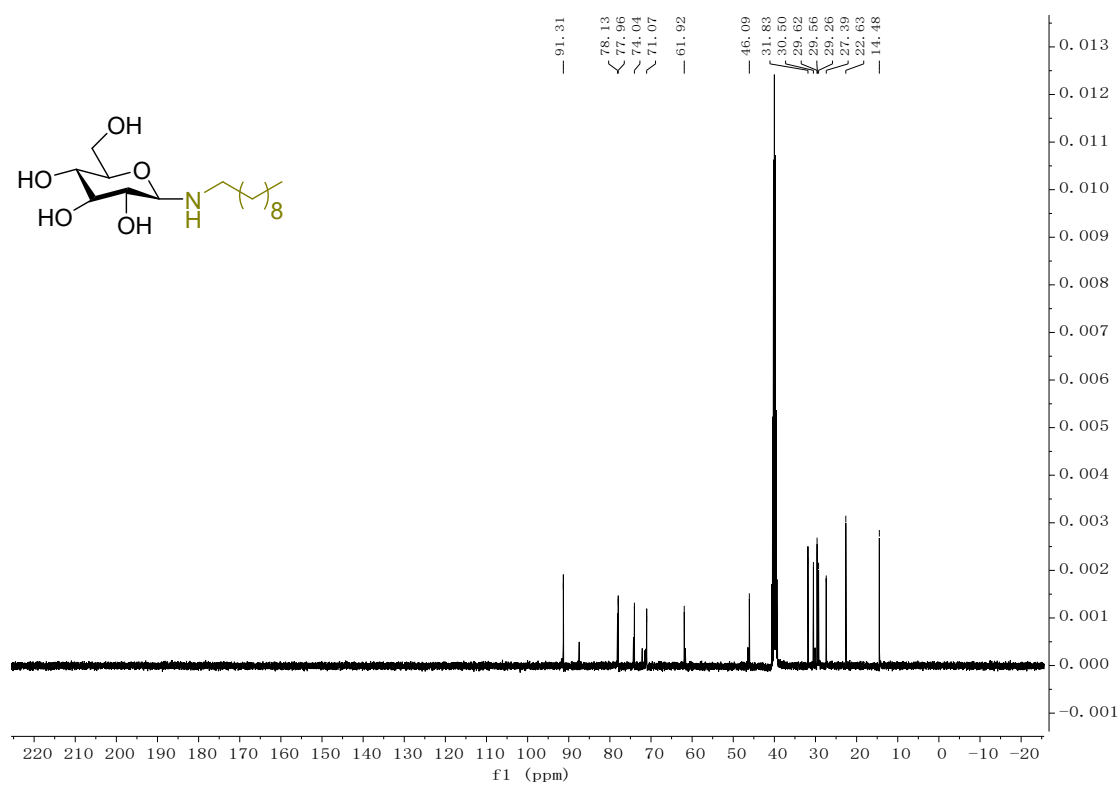

# N-Dodecyl glucosamine (AGA12)

## <sup>1</sup>H NMR

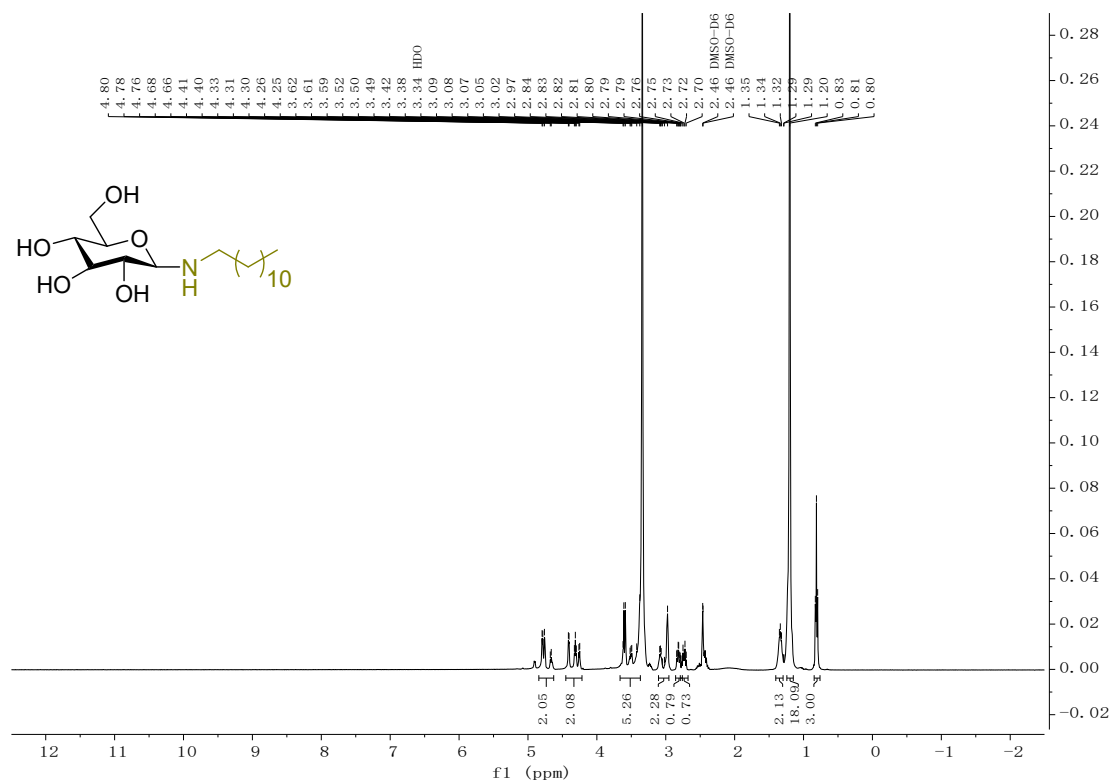

## <sup>13</sup>C NMR

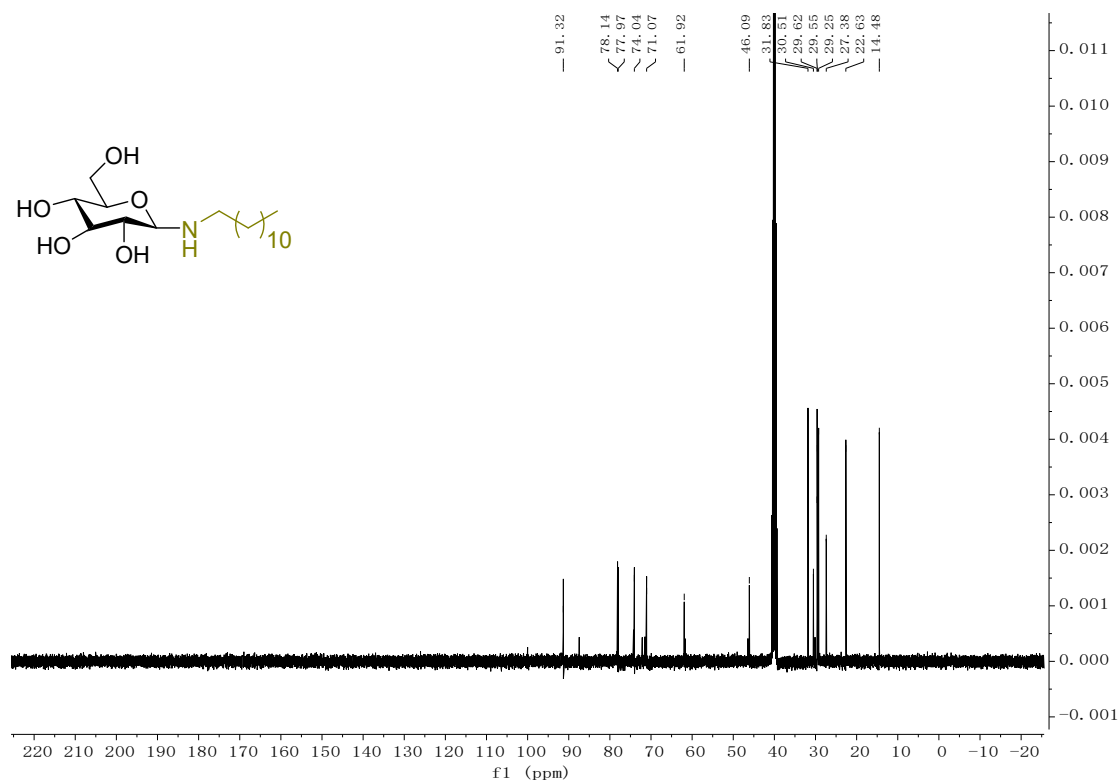

# N-Tetradecyl glucosamine (AGA14)

## <sup>1</sup>H NMR

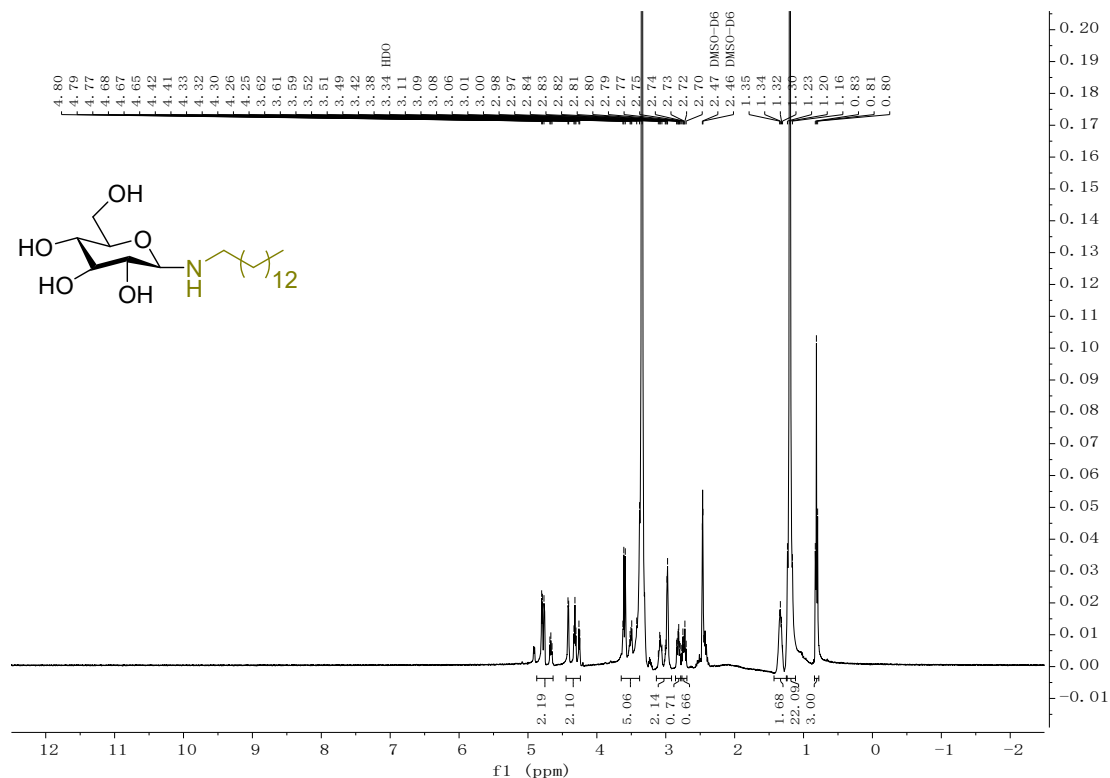

## <sup>13</sup>C NMR

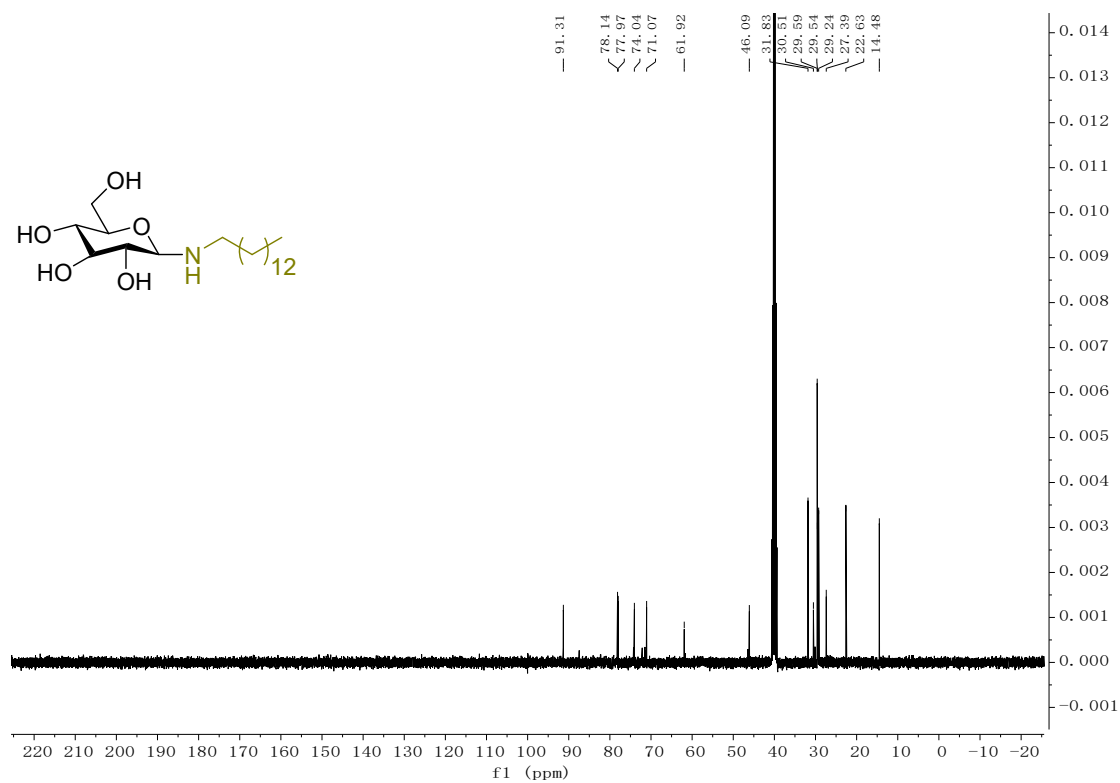

# N-hexadecyl glucosamine (AGA16)

## <sup>1</sup>H NMR

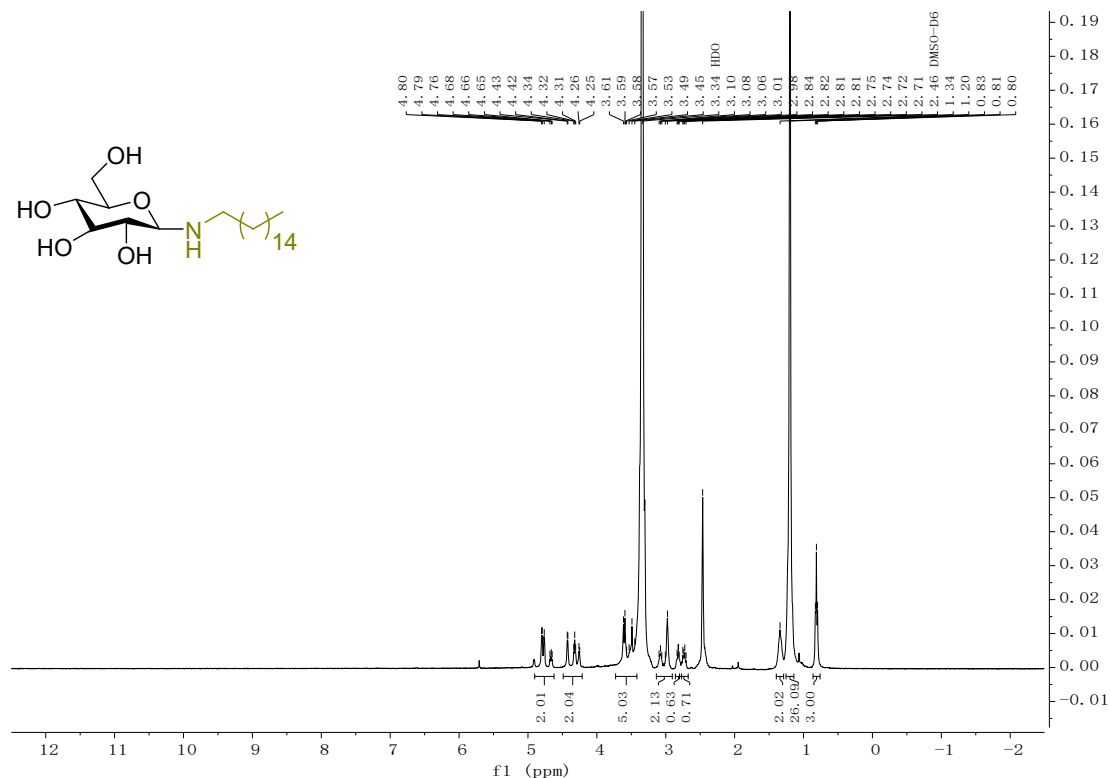

## <sup>13</sup>C NMR

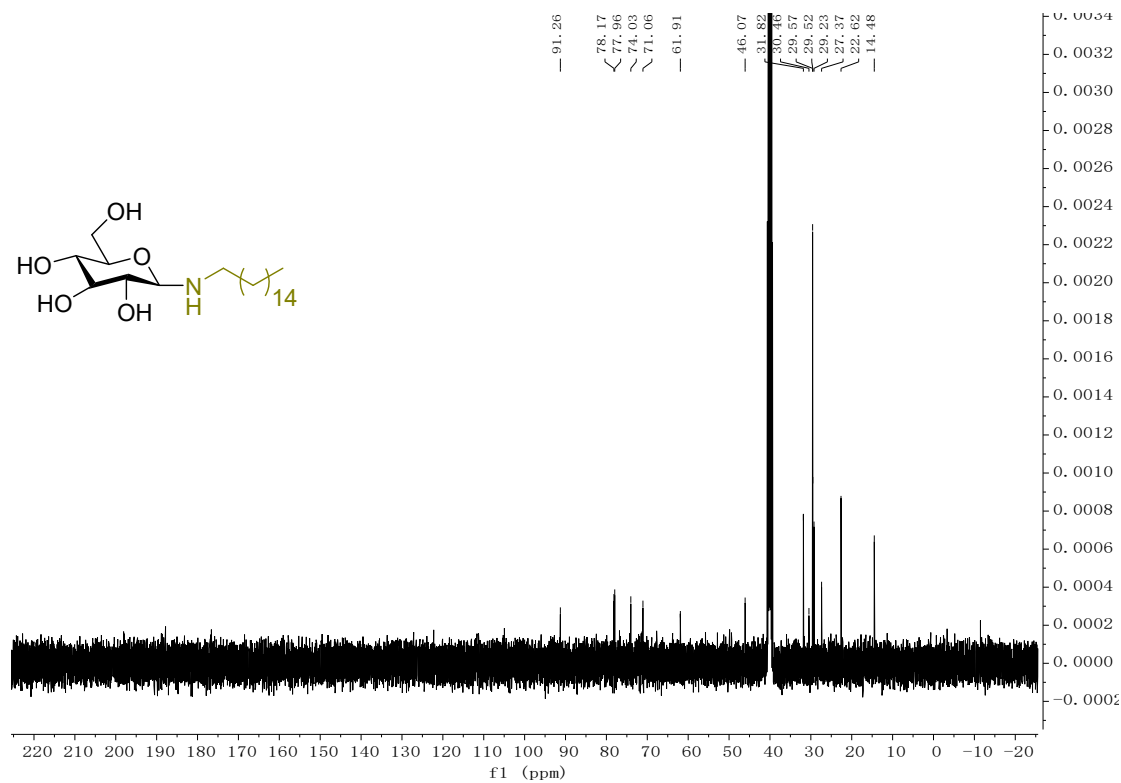

# N,N-Dimethylbenzothioamide

## <sup>1</sup>H NMR

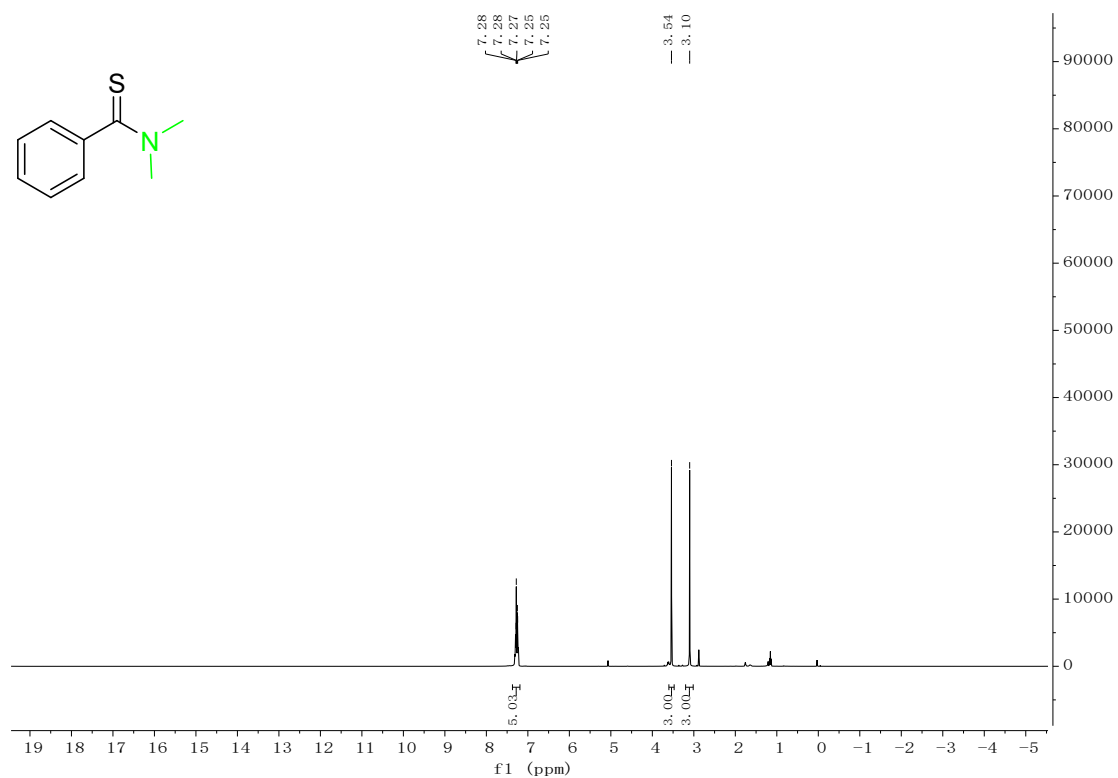

## <sup>13</sup>C NMR

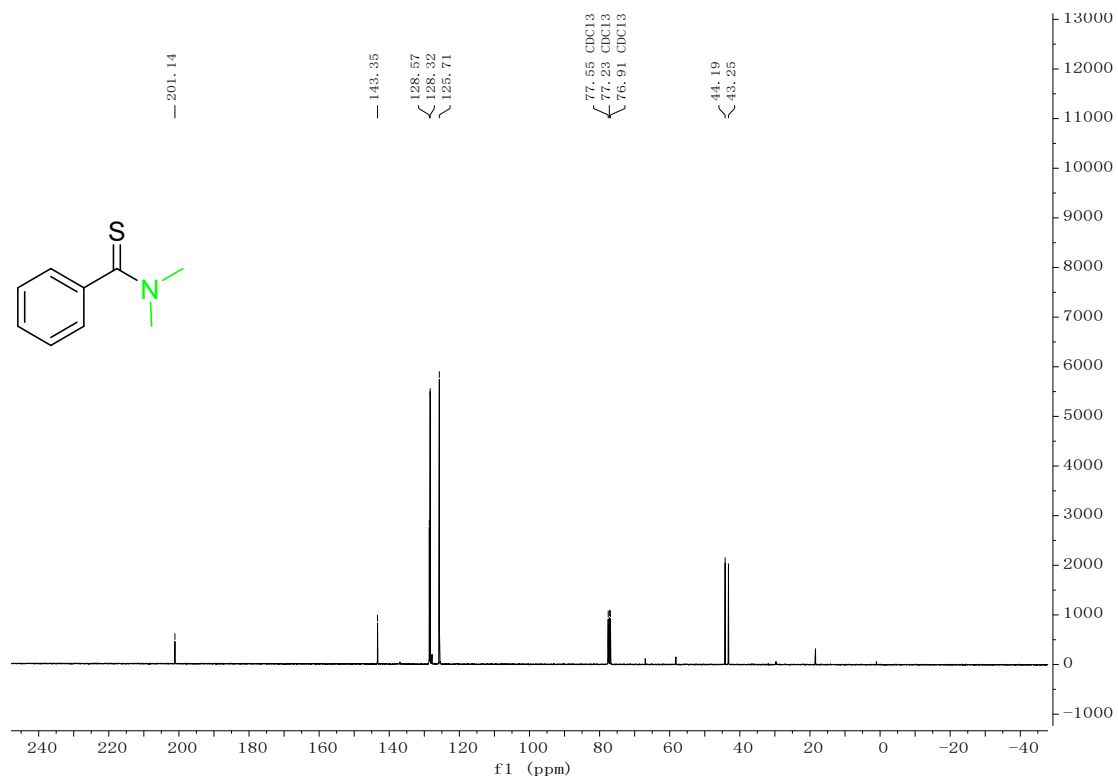

## N,N,3-Trimethylbenzothioamide

### <sup>1</sup>H NMR

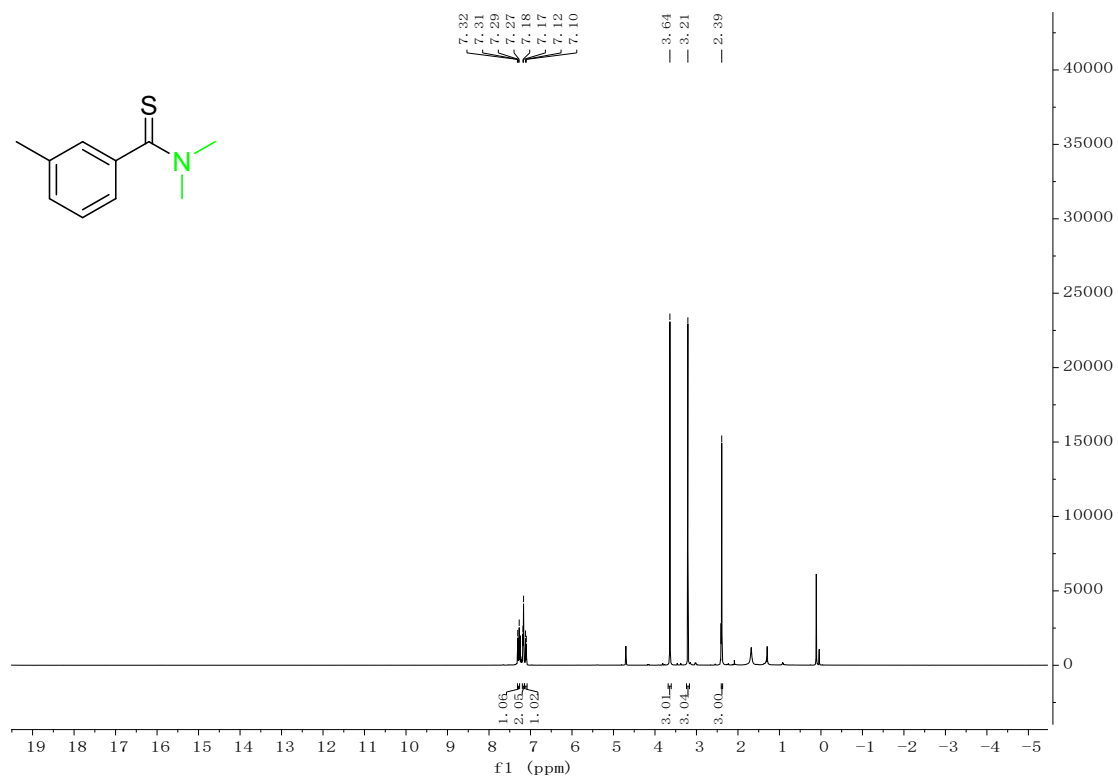



# <sup>13</sup>C NMR

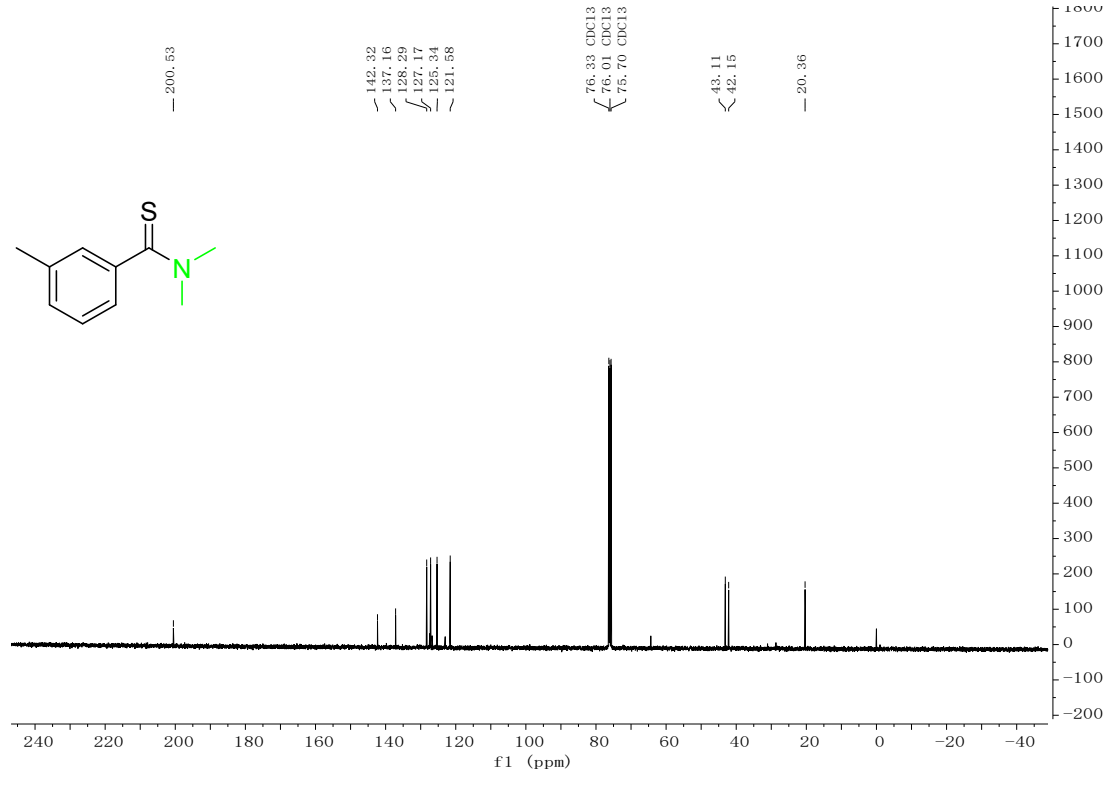

# N,N,4-Trimethylbenzothioamide

## <sup>1</sup>H NMR

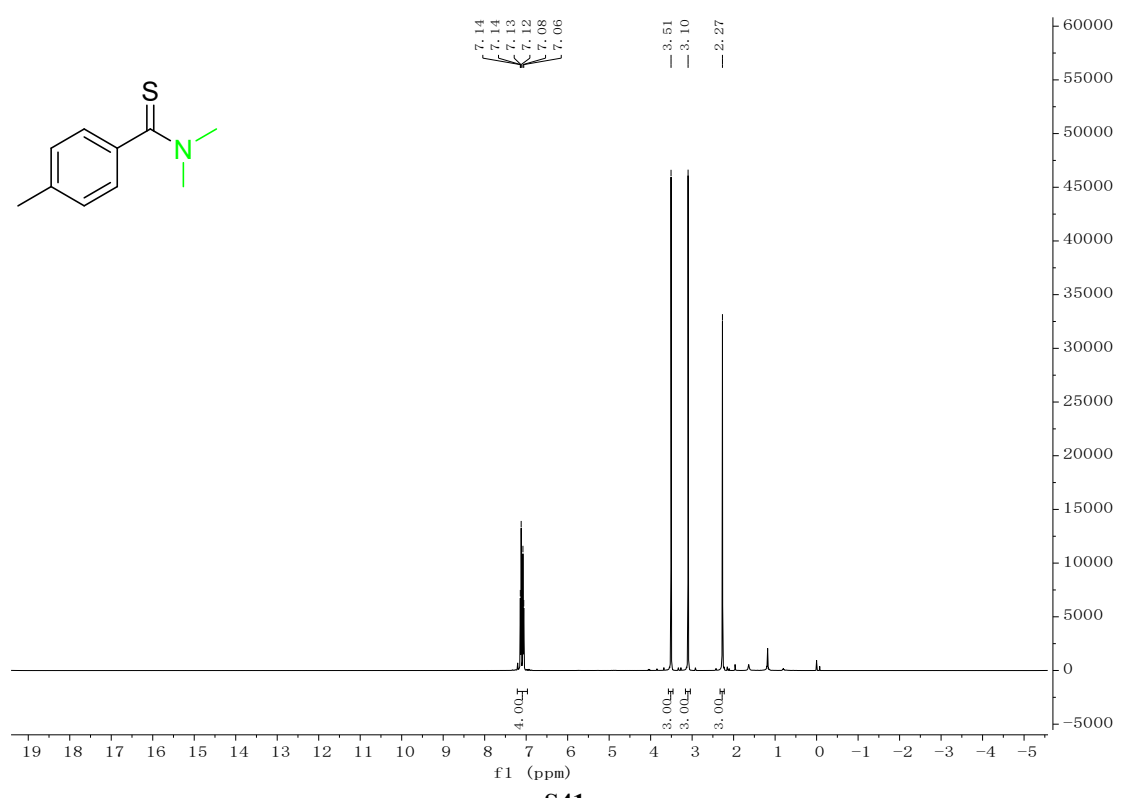

### <sup>13</sup>C NMR

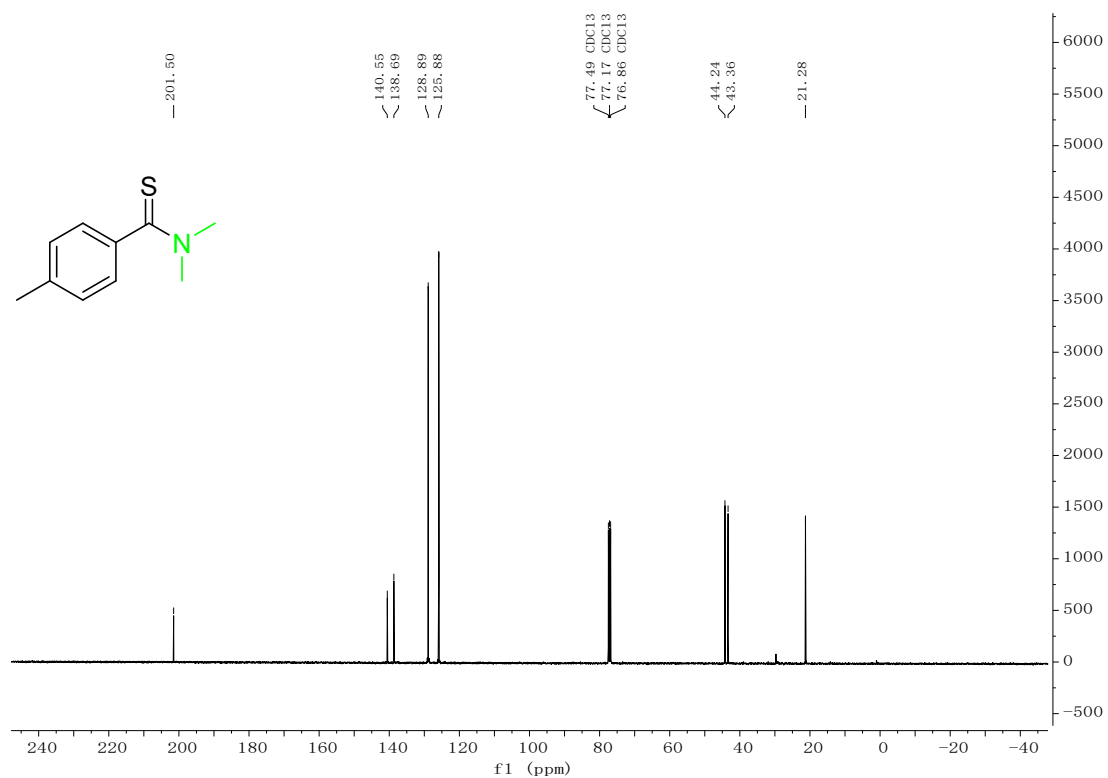

### 3-Methoxy-N,N-dimethylbenzothioamide

#### <sup>1</sup>H NMR

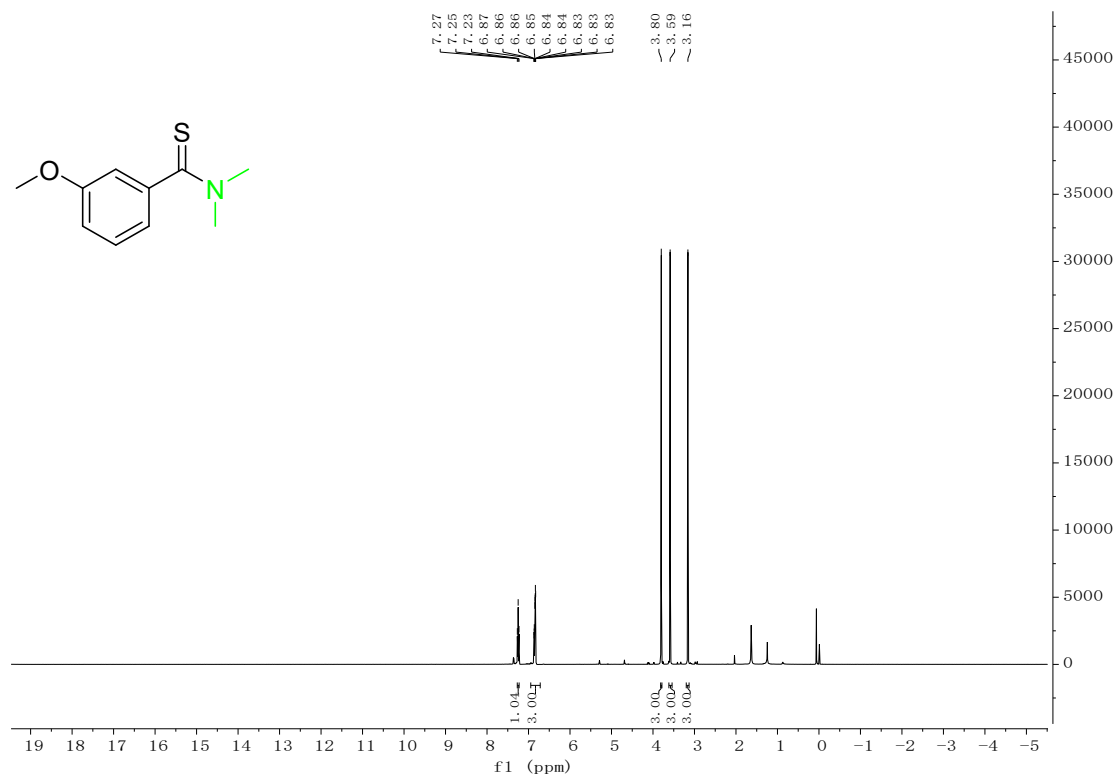

**<sup>13</sup>C NMR**

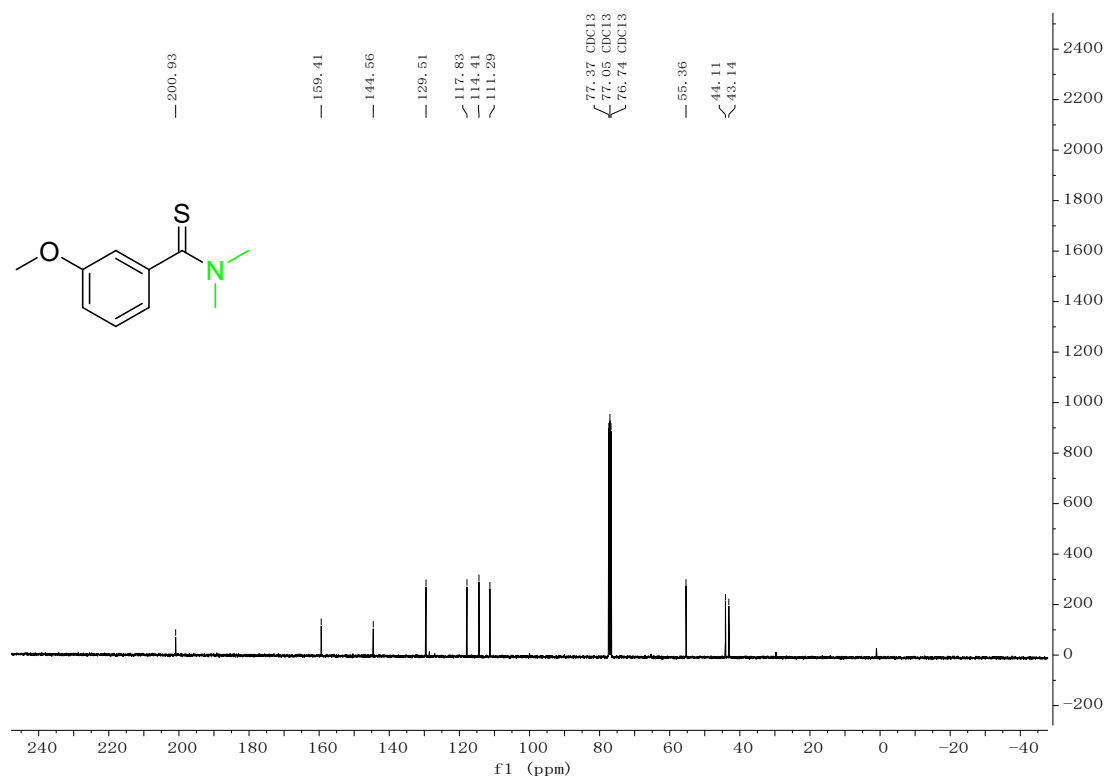

**4-*tert*-Dutyl-N,N-dimethylbenzothioamide**

# <sup>1</sup>H NMR

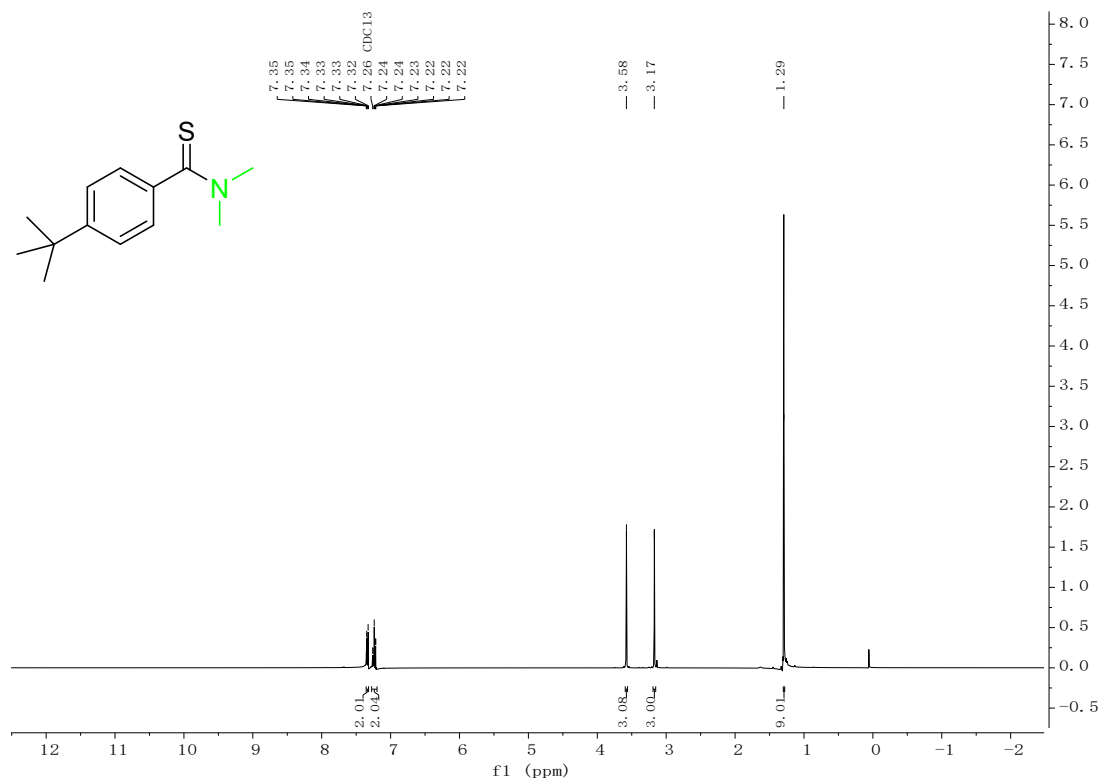

# <sup>13</sup>C NMR

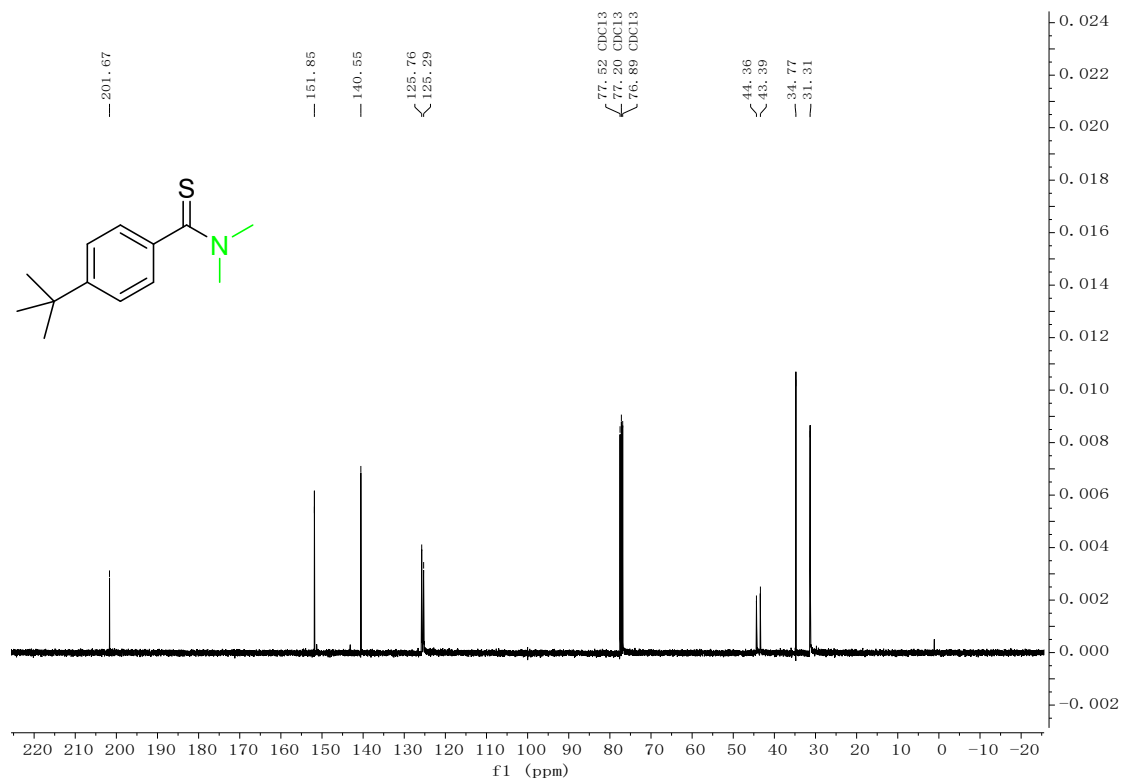

4-Fluoro-N,N-dimethylbenzothioamide

# <sup>1</sup>H NMR

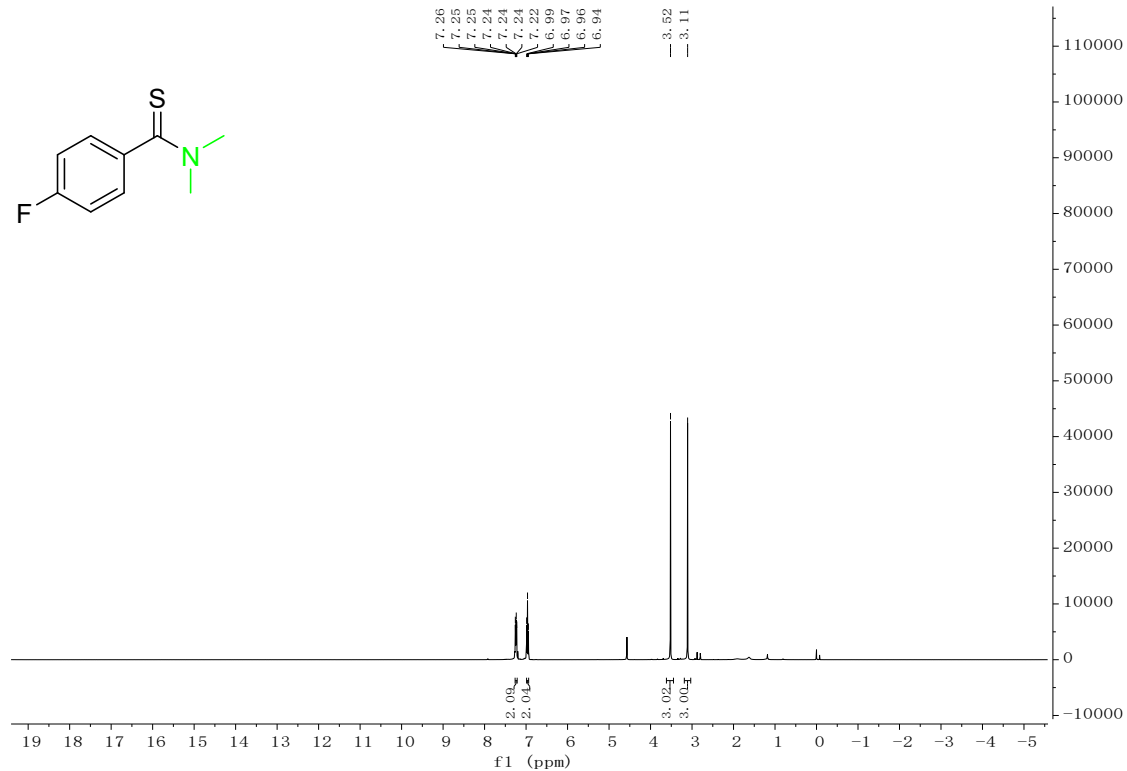

# <sup>13</sup>C NMR

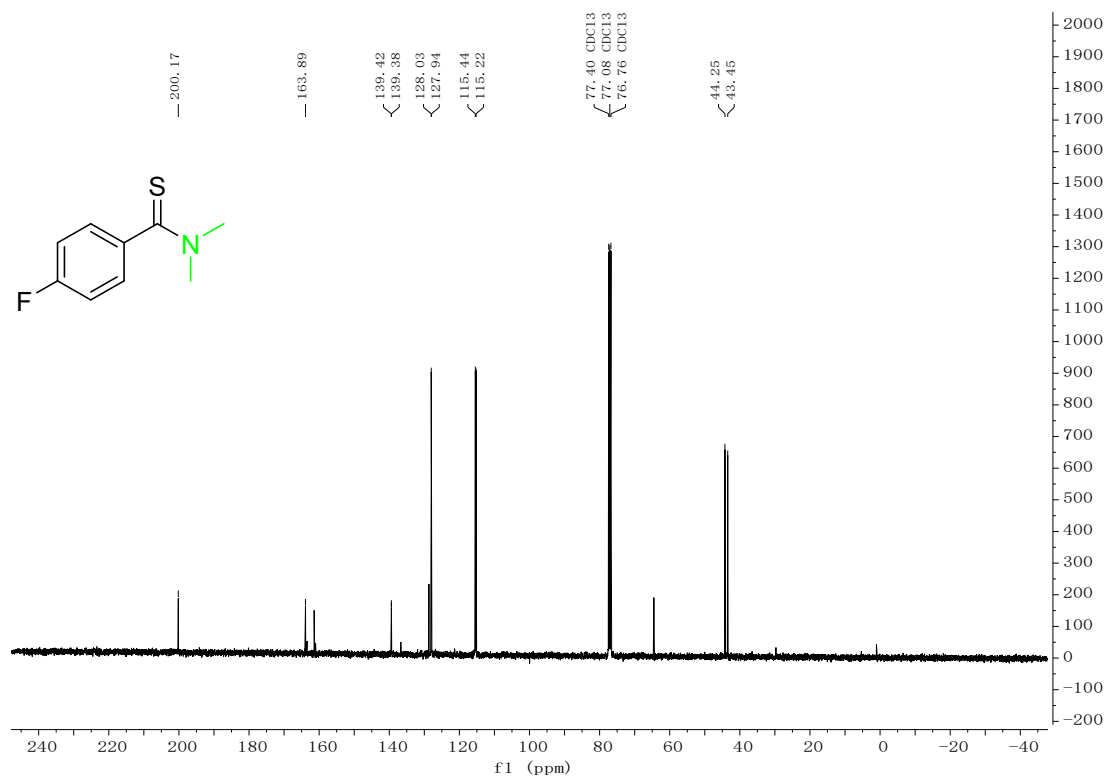

# <sup>19</sup>F NMR

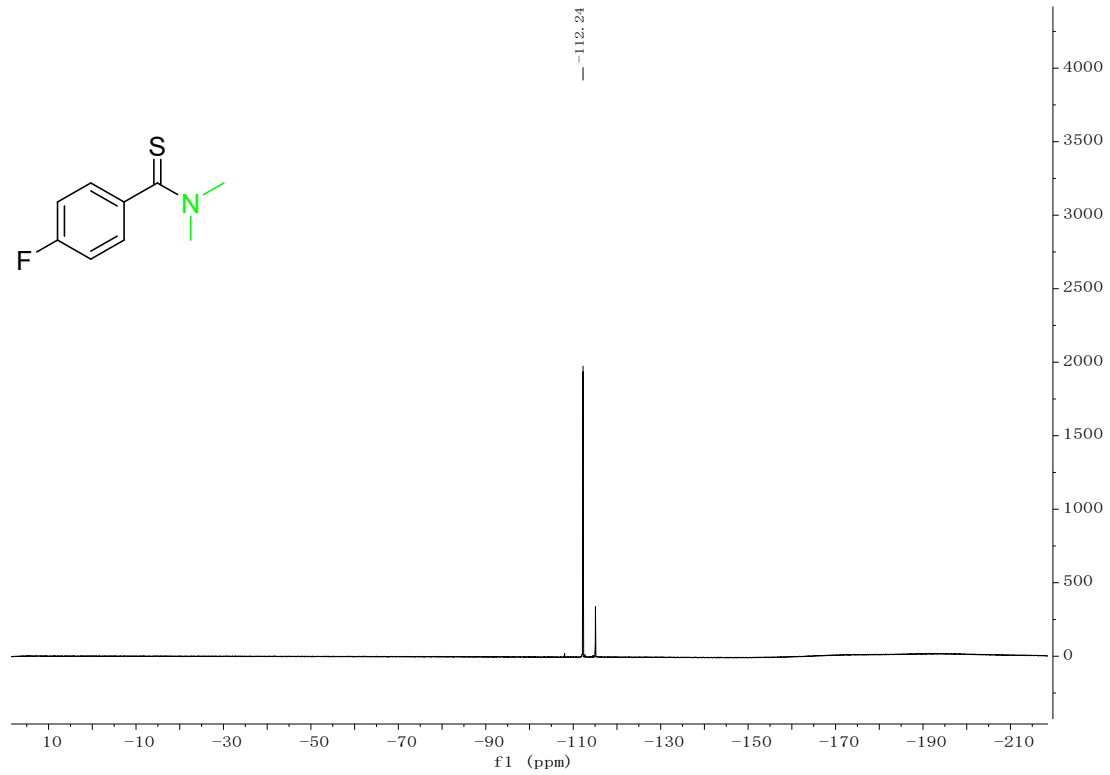

# 4-Chloro-N,N-dimethylbenzothioamide

## <sup>1</sup>H NMR

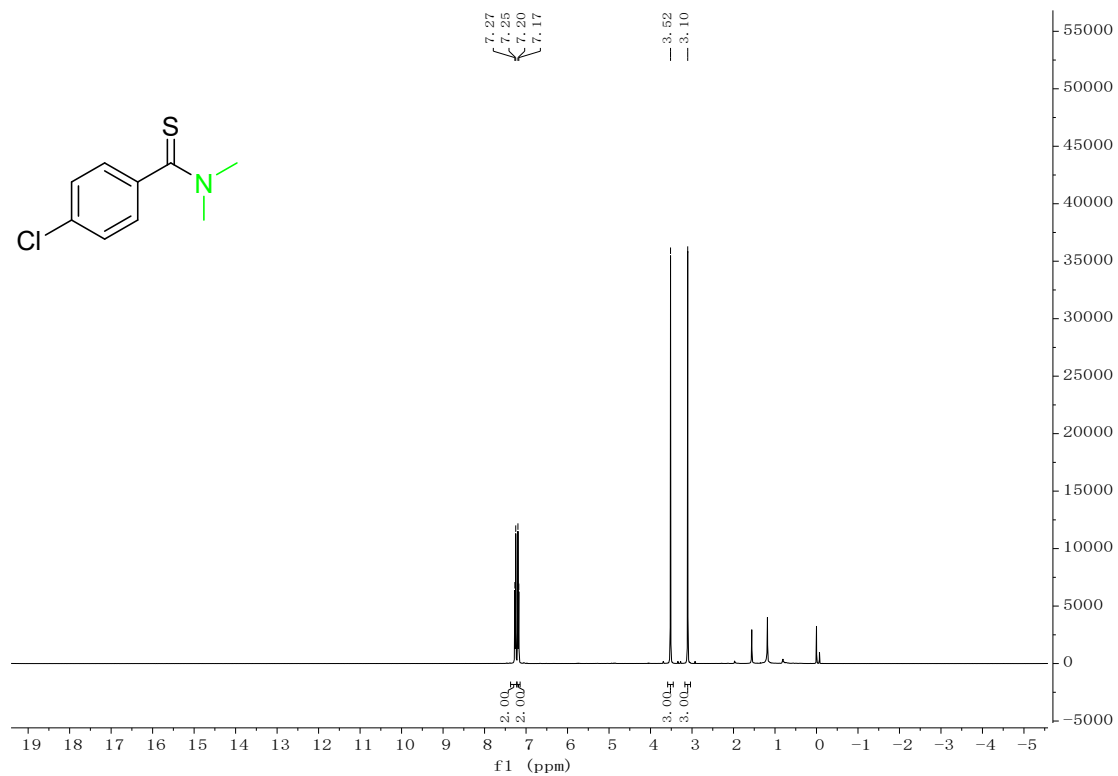

## <sup>13</sup>C NMR

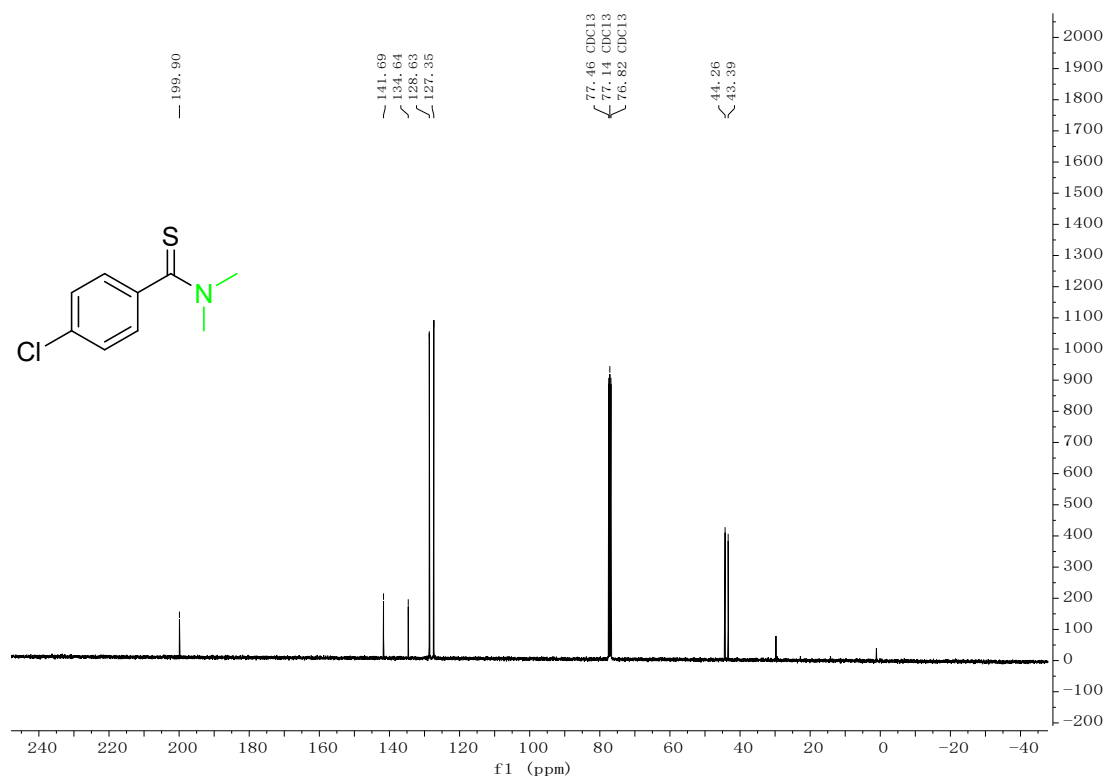

### 4-Bromo-N,N-dimethylbenzothioamide

#### <sup>1</sup>H NMR

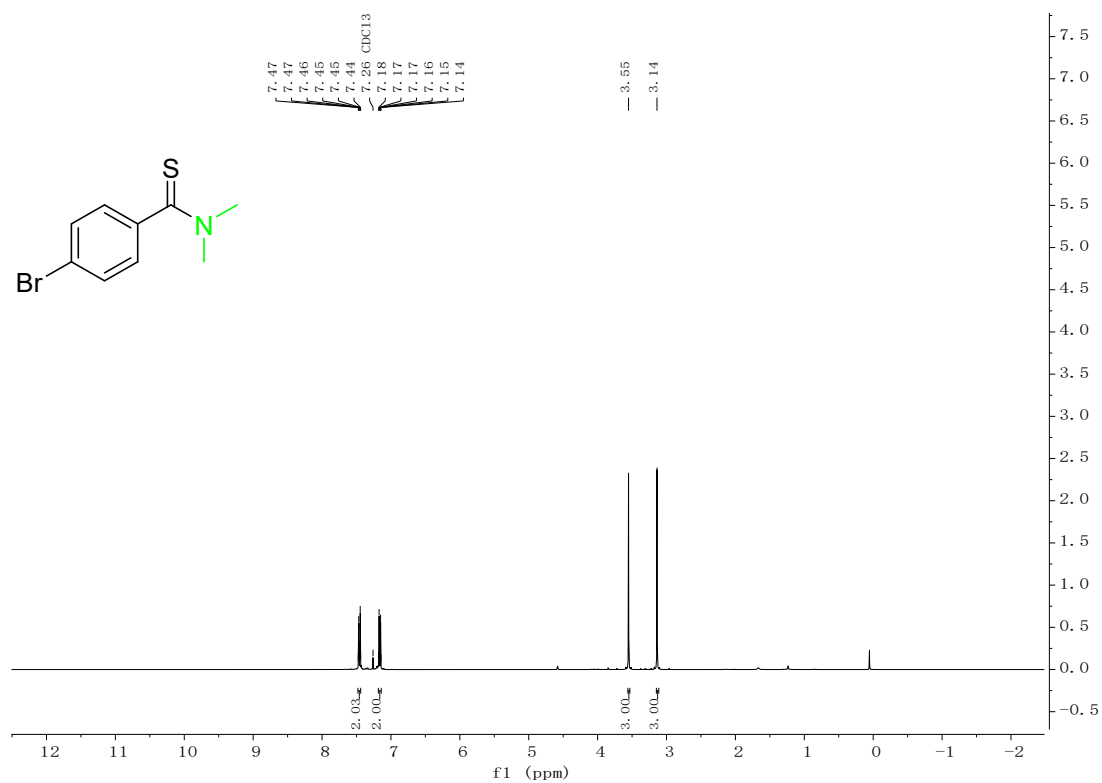



## <sup>12</sup>C NMR

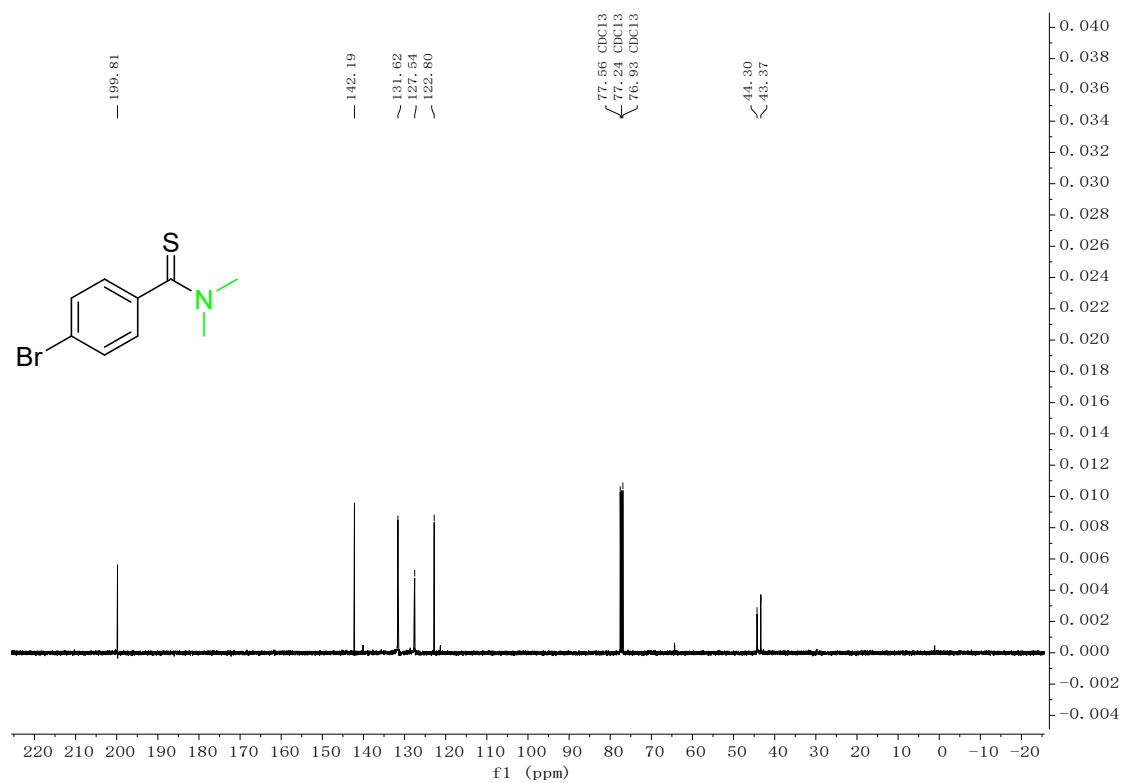

## N,N-Dimethyl-3-(trifluoromethyl)benzothioamide

### <sup>1</sup>H NMR

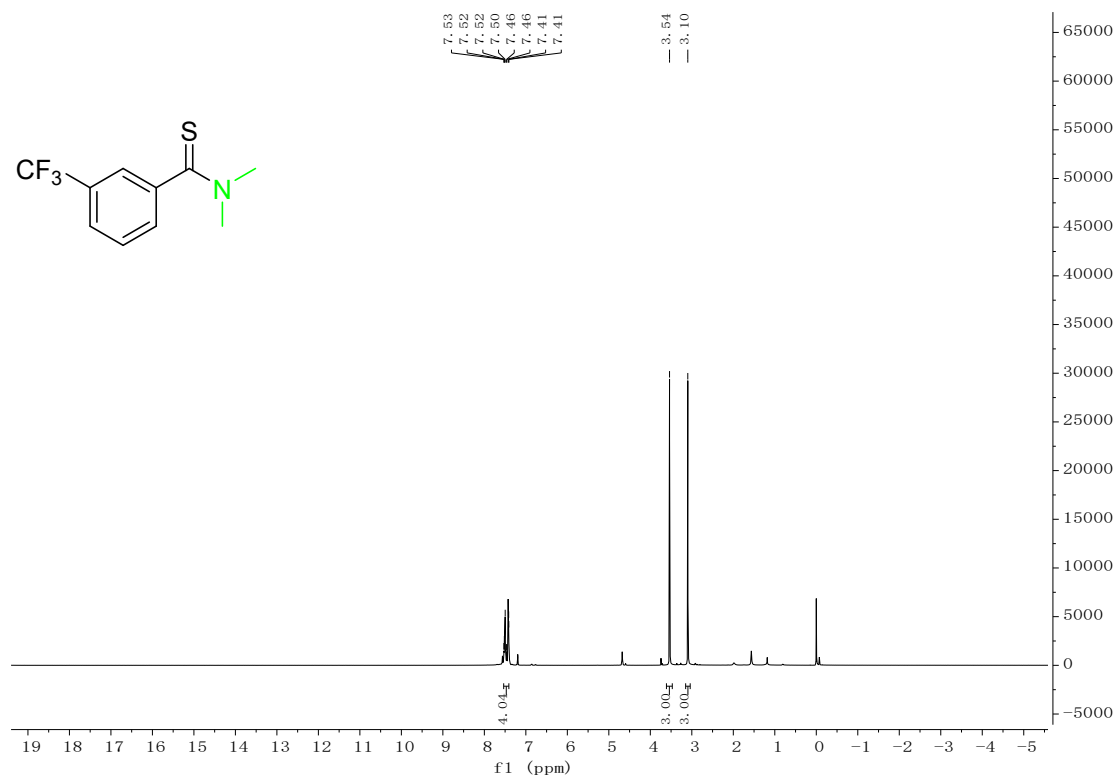

# <sup>13</sup>C NMR

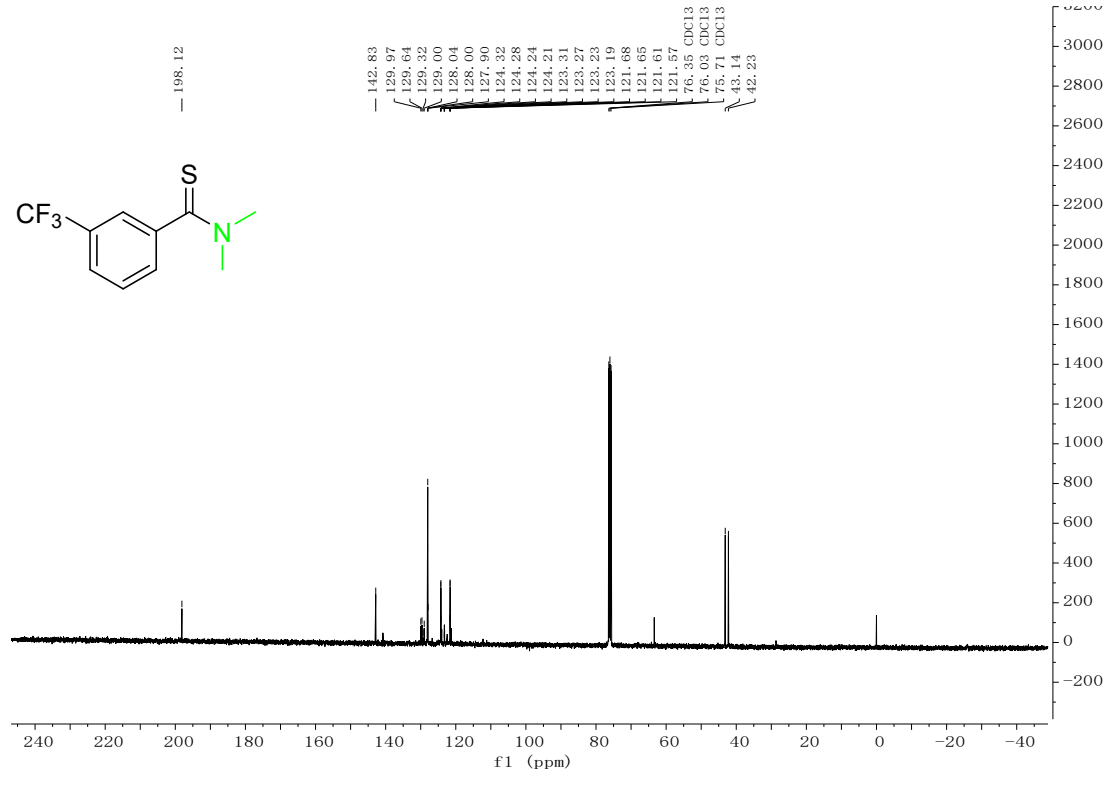

# <sup>19</sup>F NMR

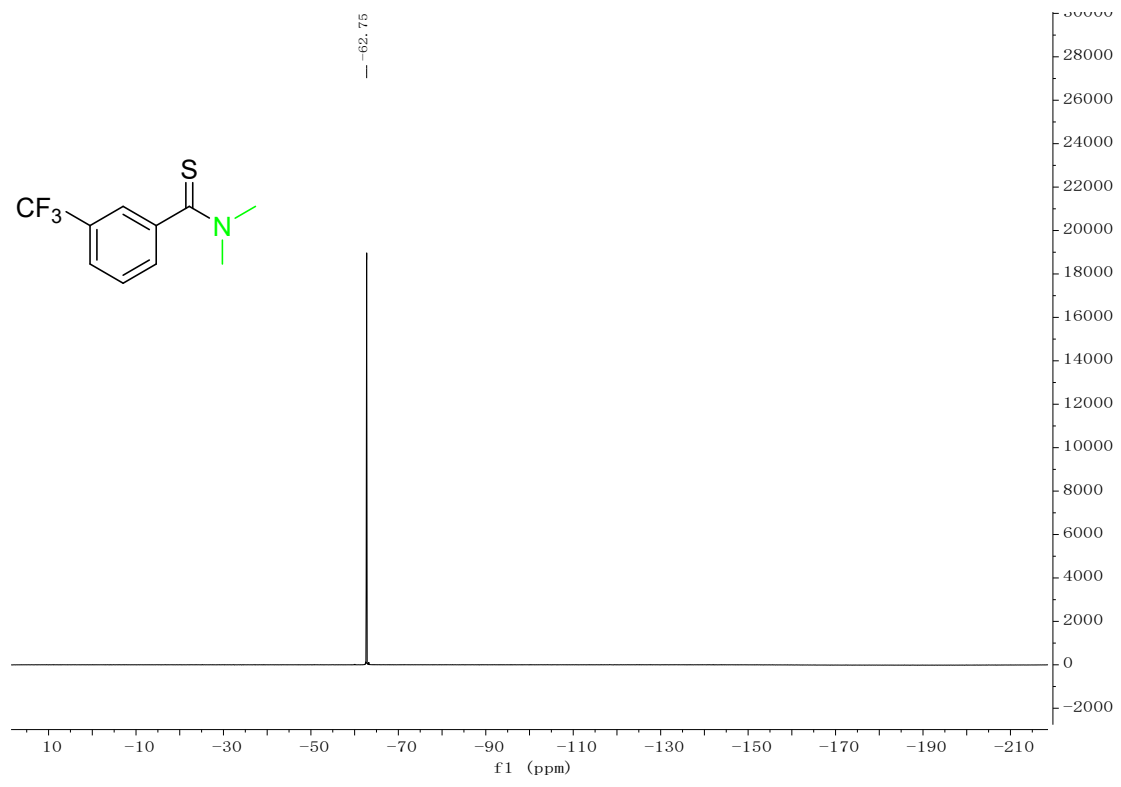

**N,N-Dimethylfuran-2-carbothioamide**

**<sup>1</sup>H NMR**

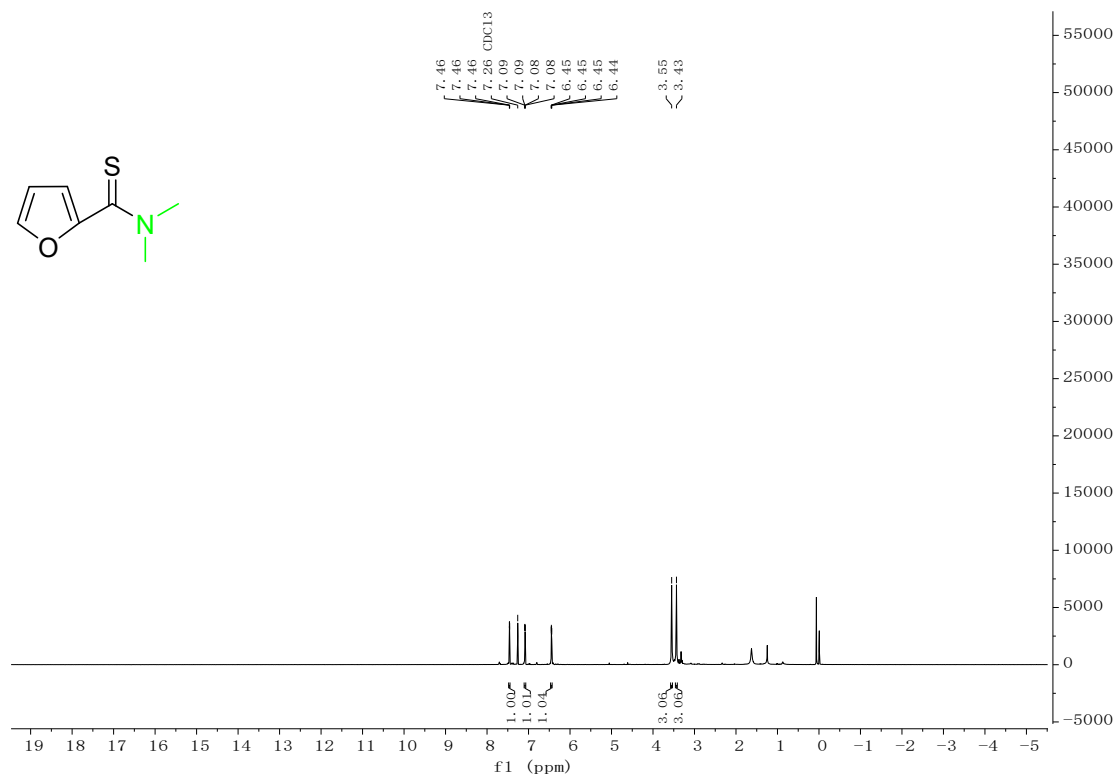

### <sup>13</sup>C NMR

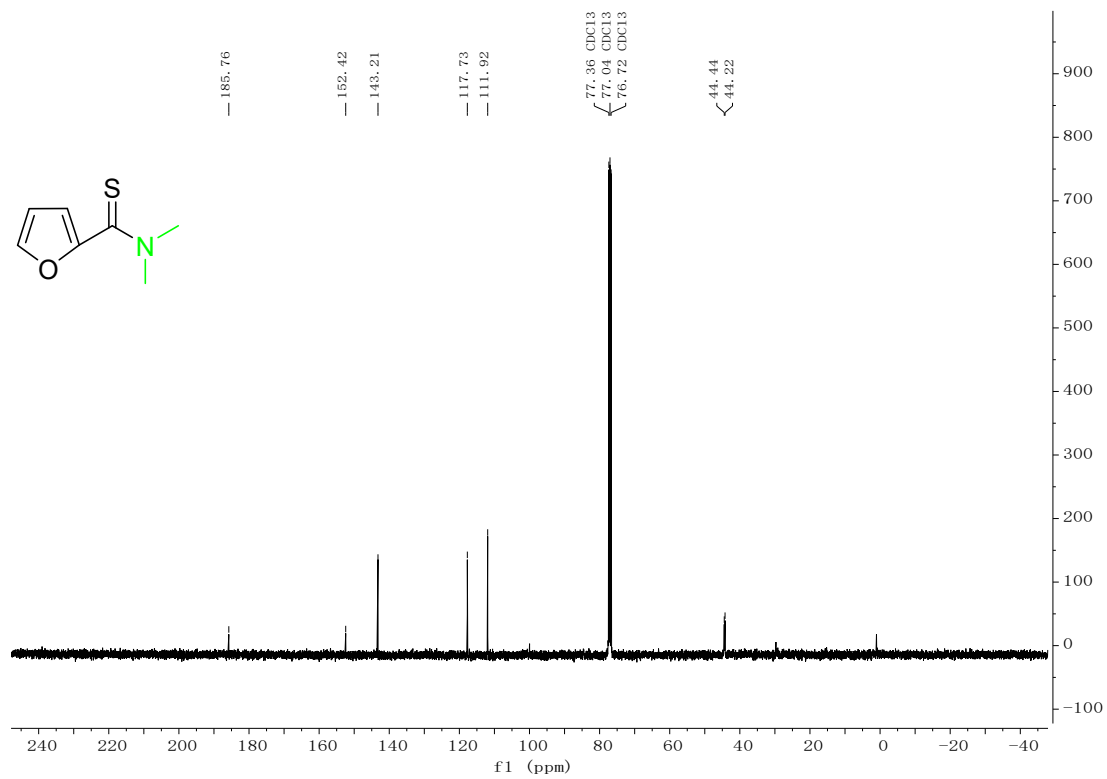

### N,N-Dimethylpyridine-3-carbothioamide

# <sup>1</sup>H NMR

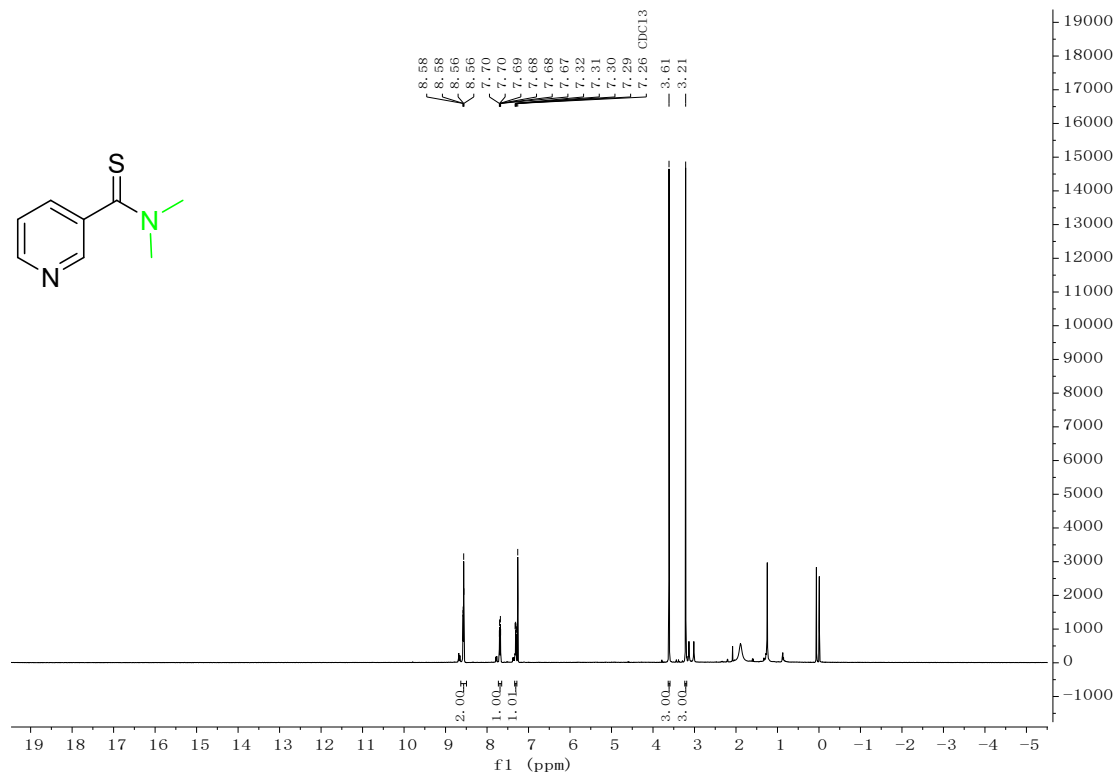

# <sup>13</sup>C NMR

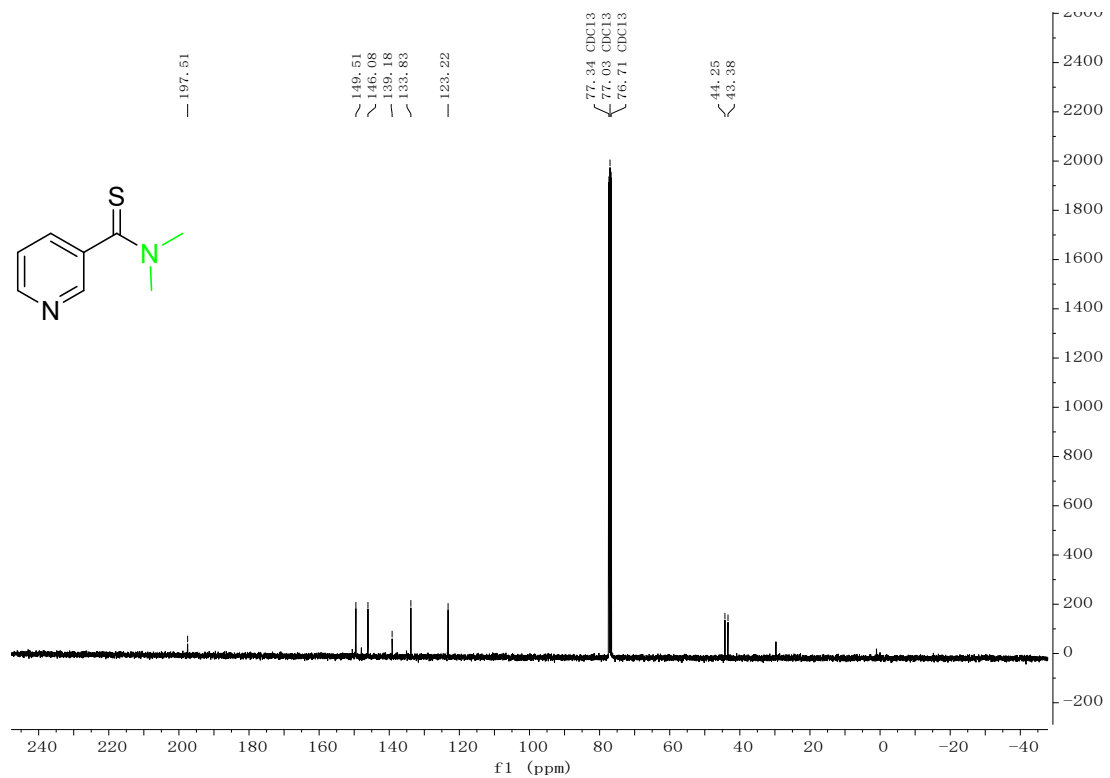

# Thiobenzmorpholid

## $^1\text{H}$ NMR

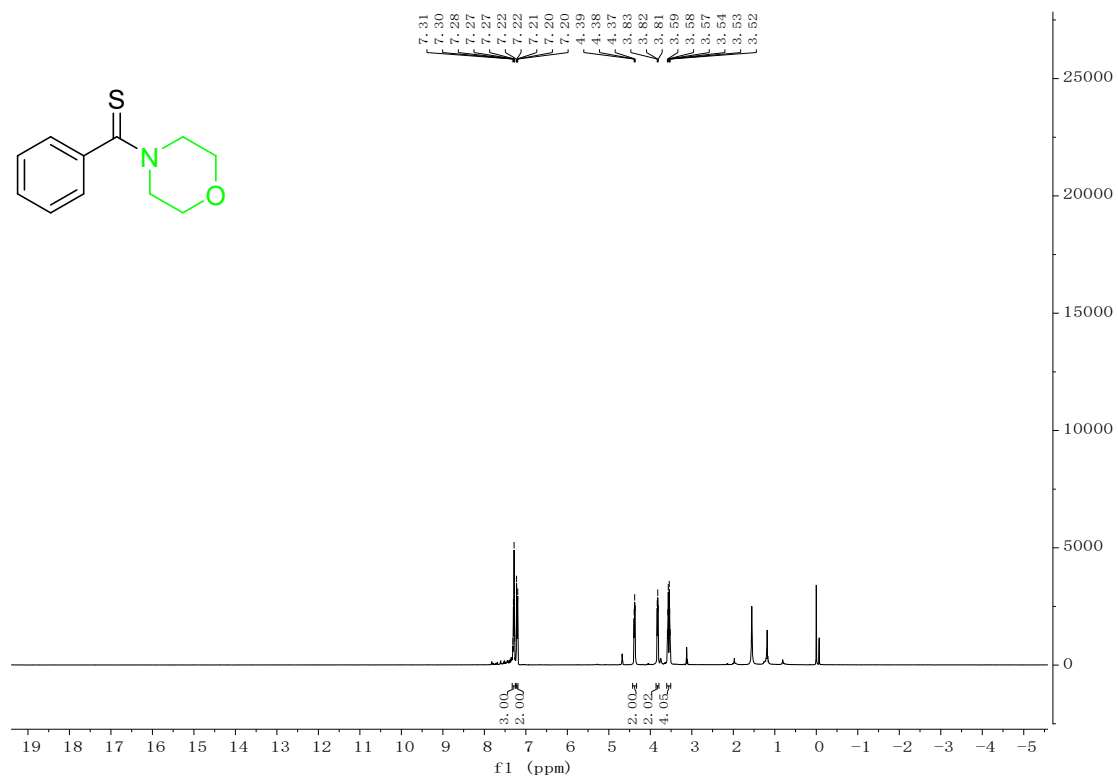

## $^{13}\text{C}$ NMR

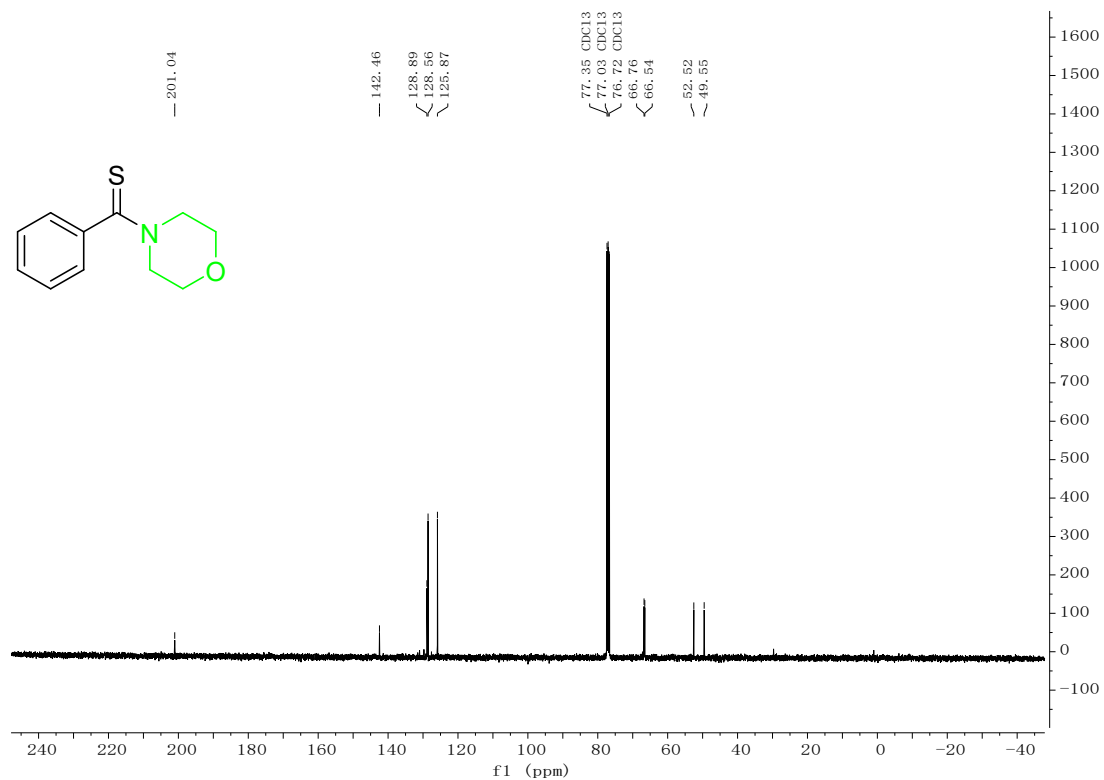

## N-Thiobenzoylpiperidine

### <sup>1</sup>H NMR

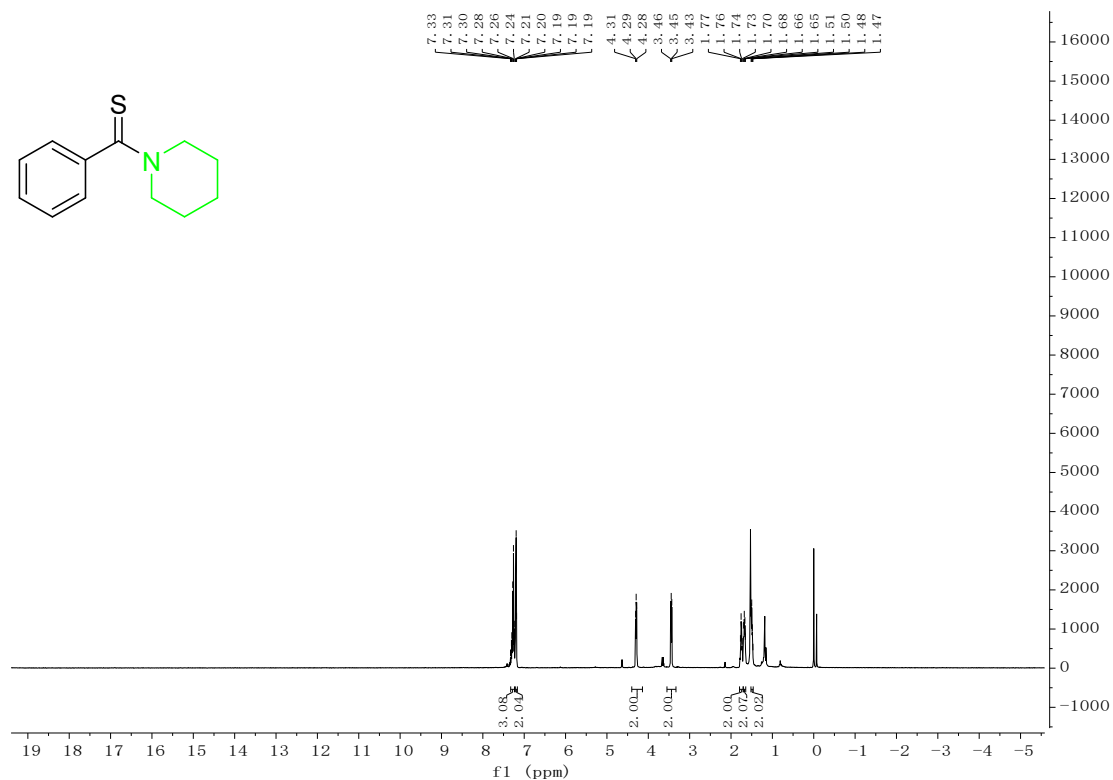

### <sup>13</sup>C NMR

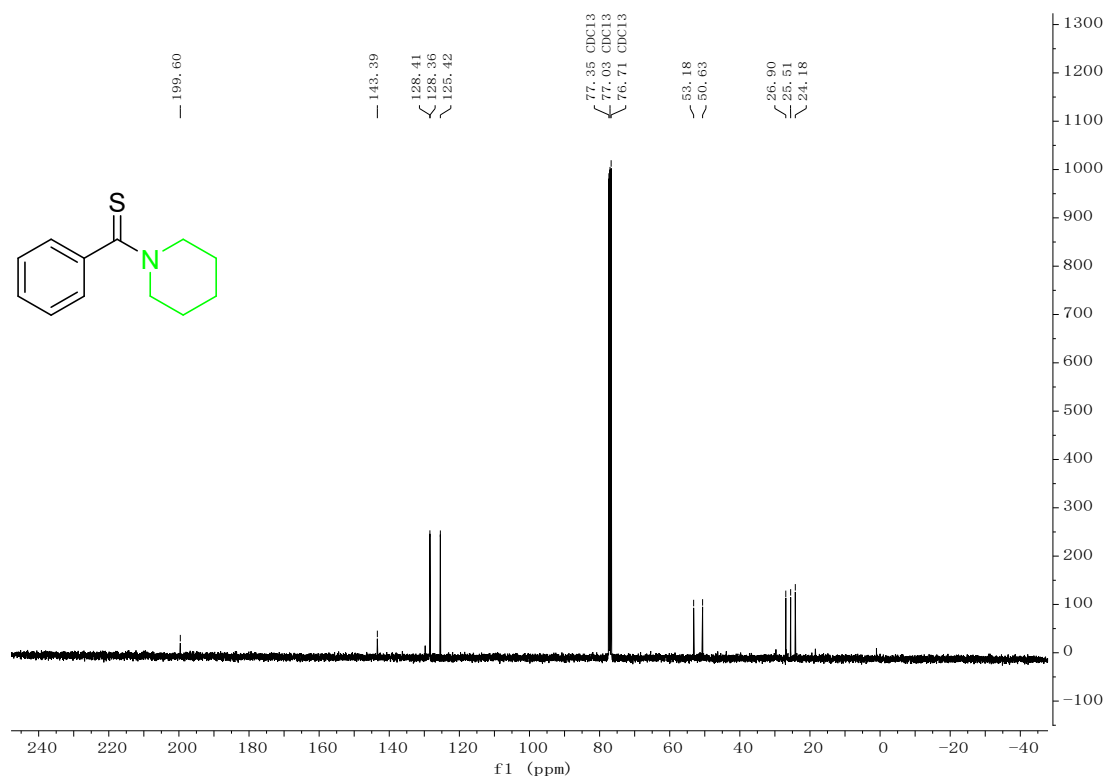

## N,N-Dimethylbutanethioamide

### <sup>1</sup>H NMR

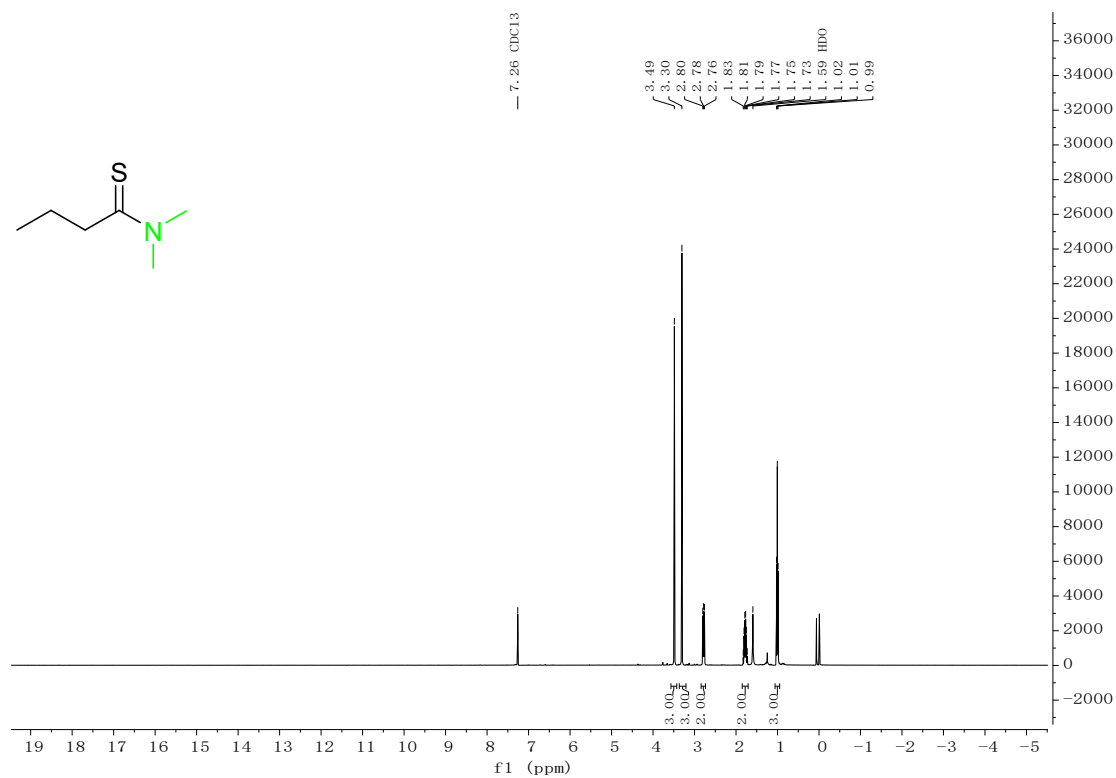



# <sup>13</sup>C NMR

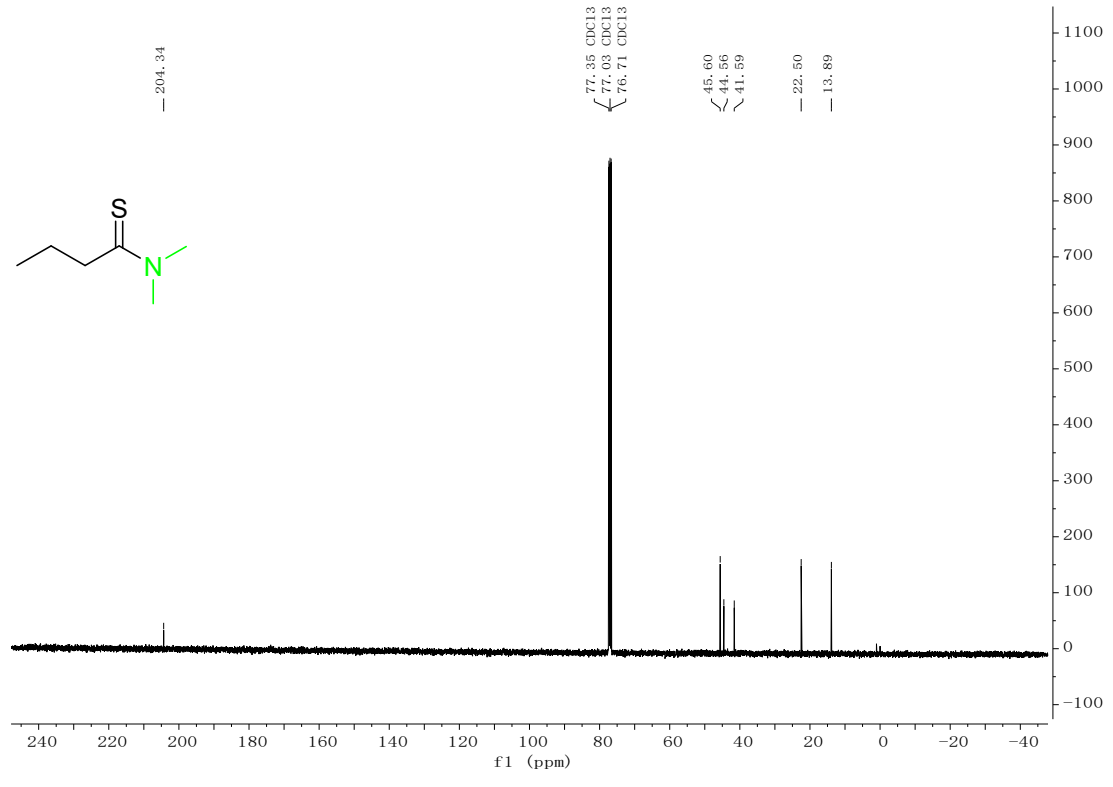

# N,N,2-Trimethylpropanethioamide

## <sup>1</sup>H NMR

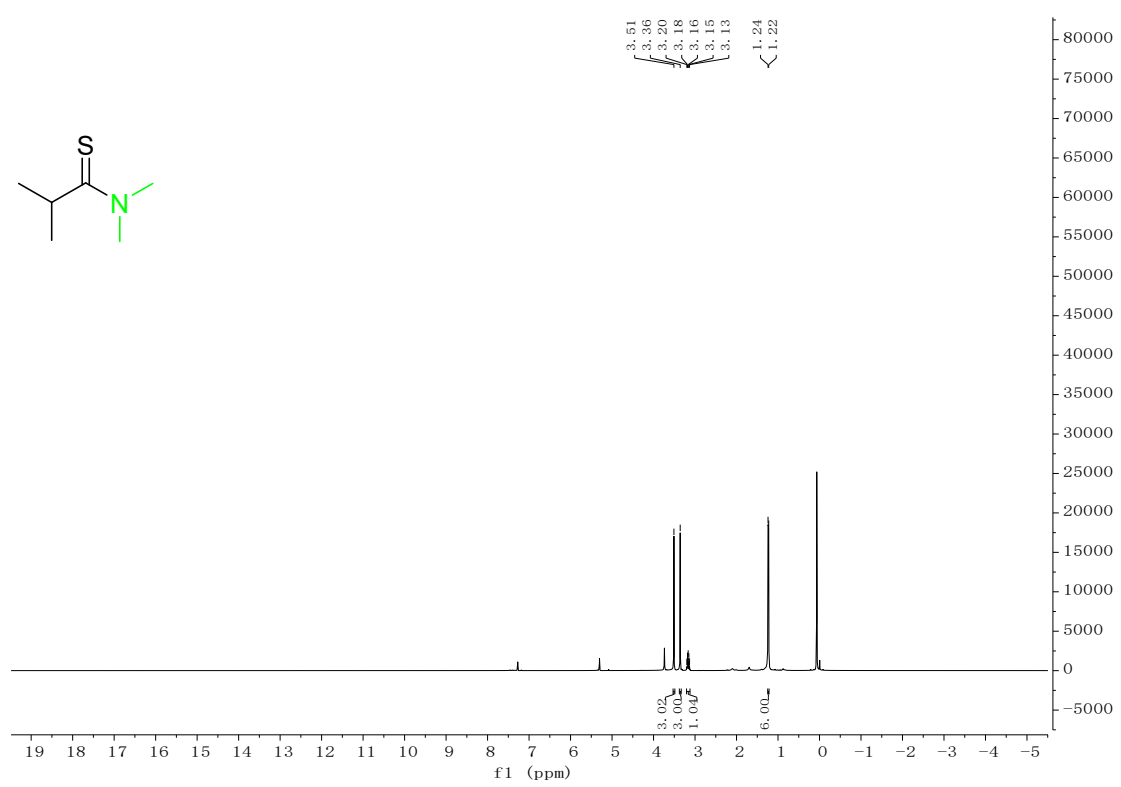

# <sup>13</sup>C NMR

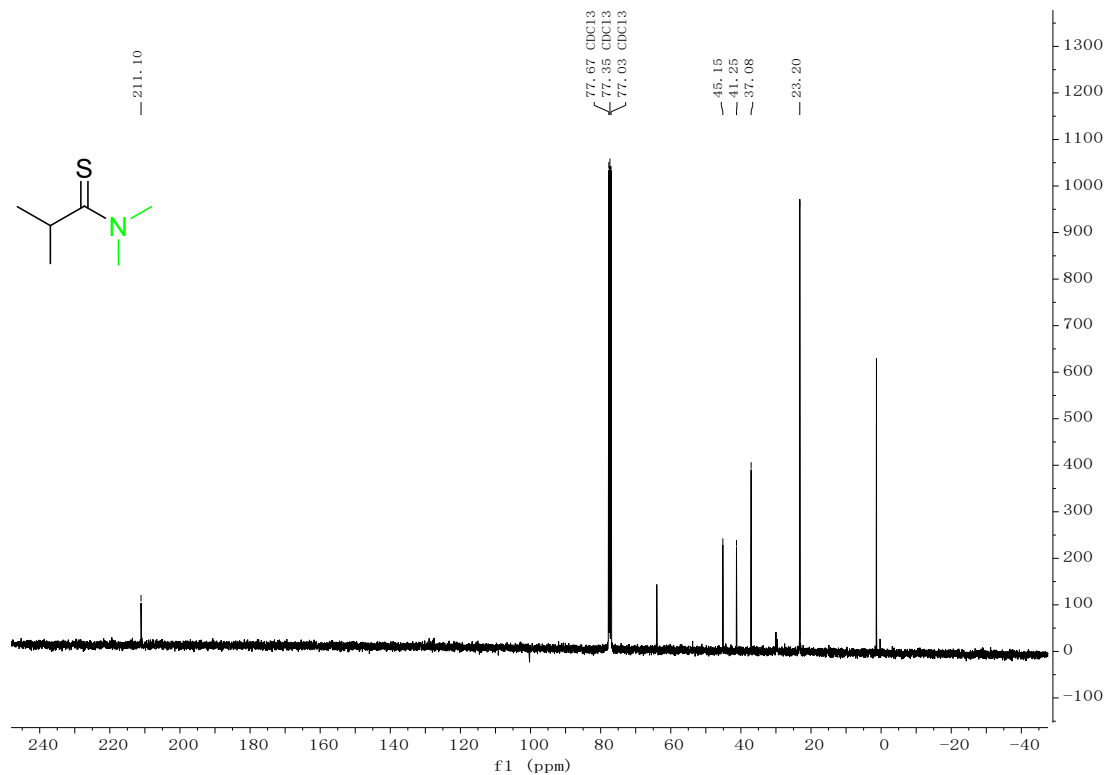

## 4-Thiobutyl-morpholine

### <sup>1</sup>H NMR

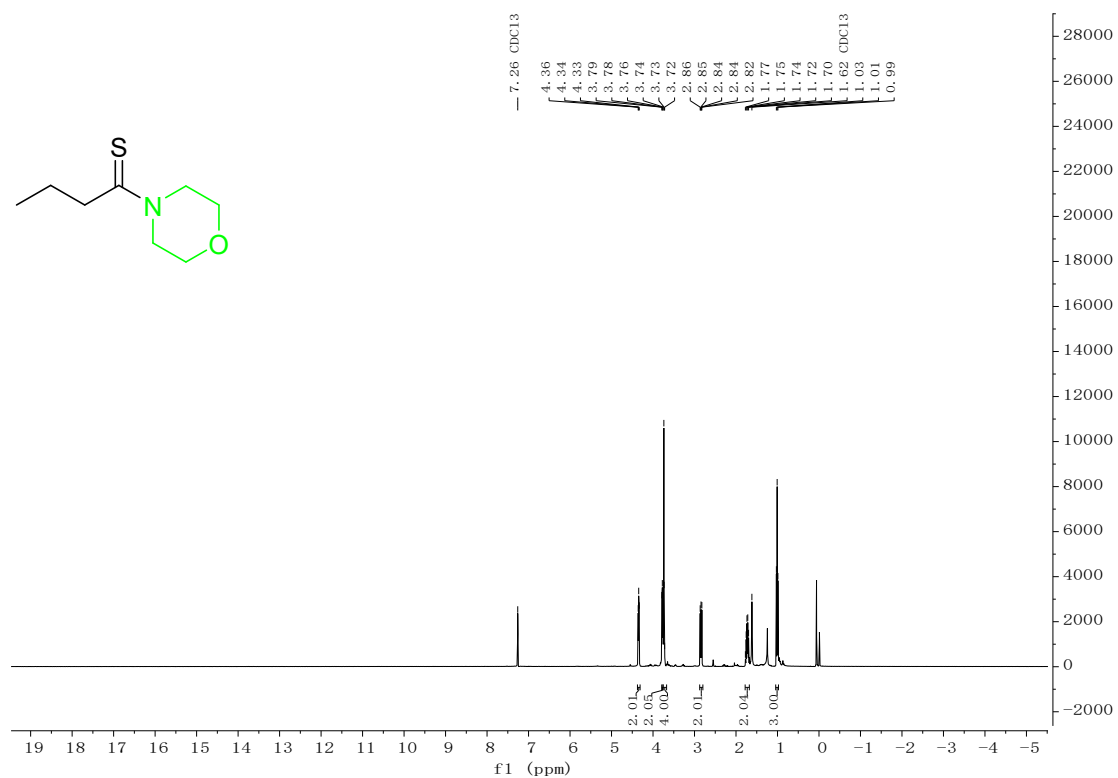

**<sup>13</sup>C NMR**

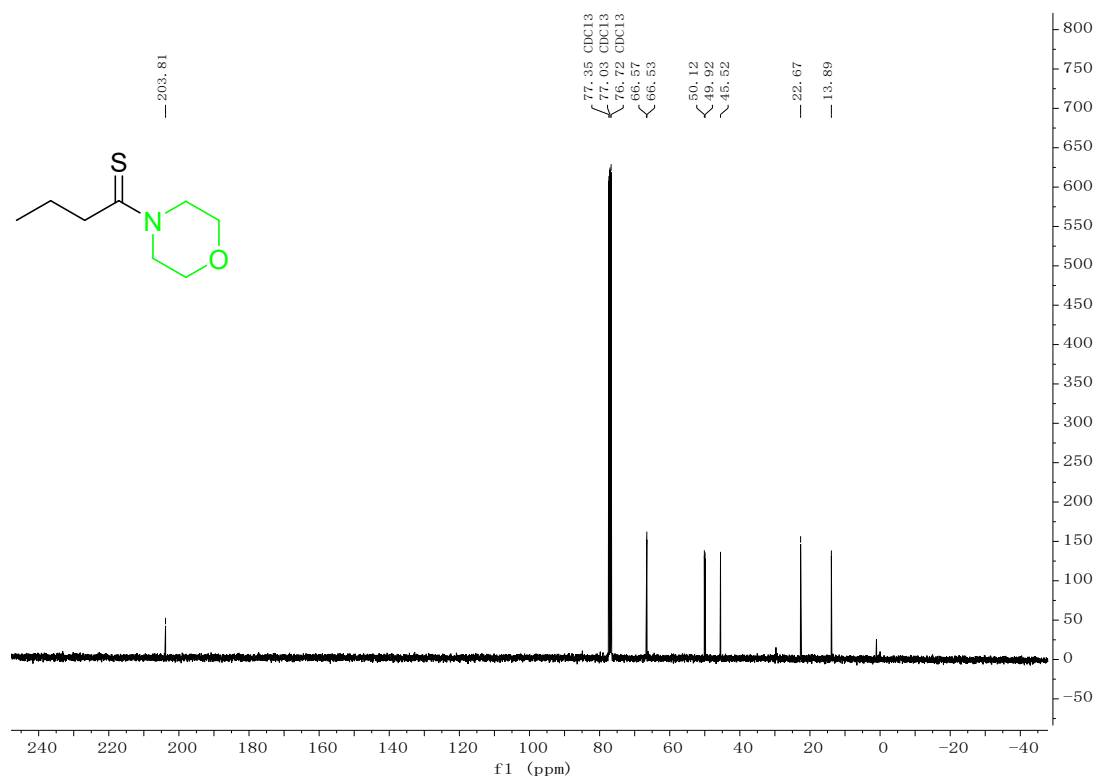

**N,N-Dimethyl-2-phenylethanethioamide**

# <sup>1</sup>H NMR

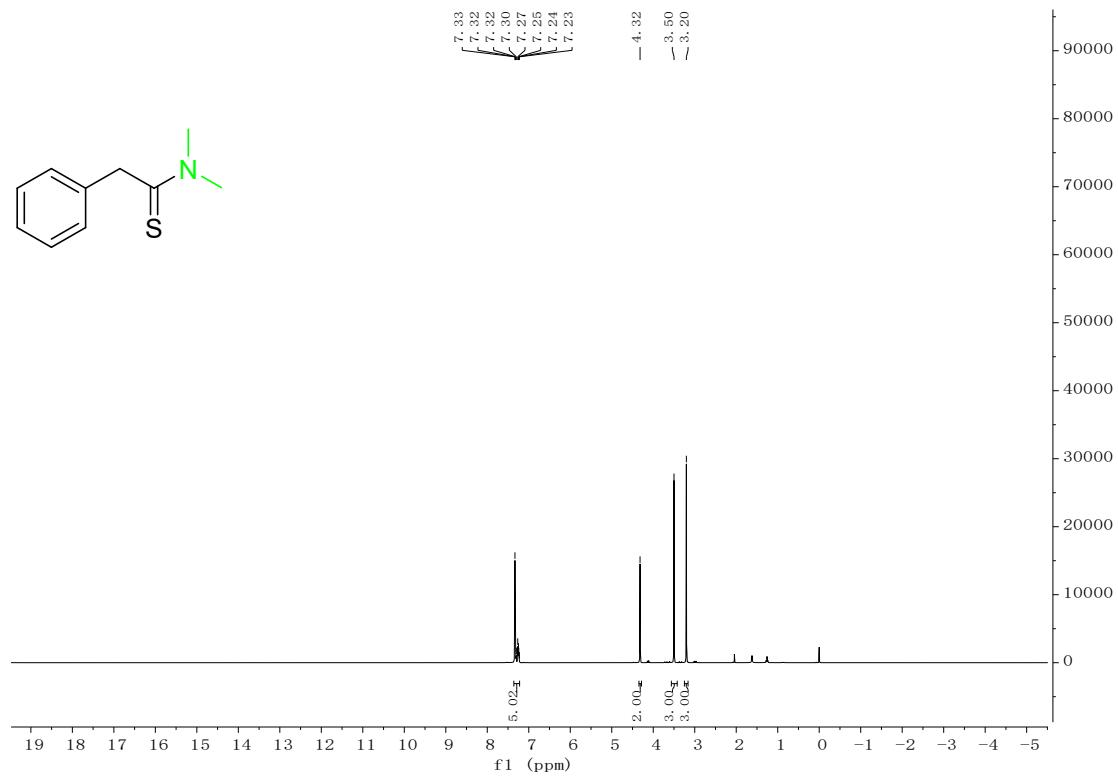

# <sup>13</sup>C NMR

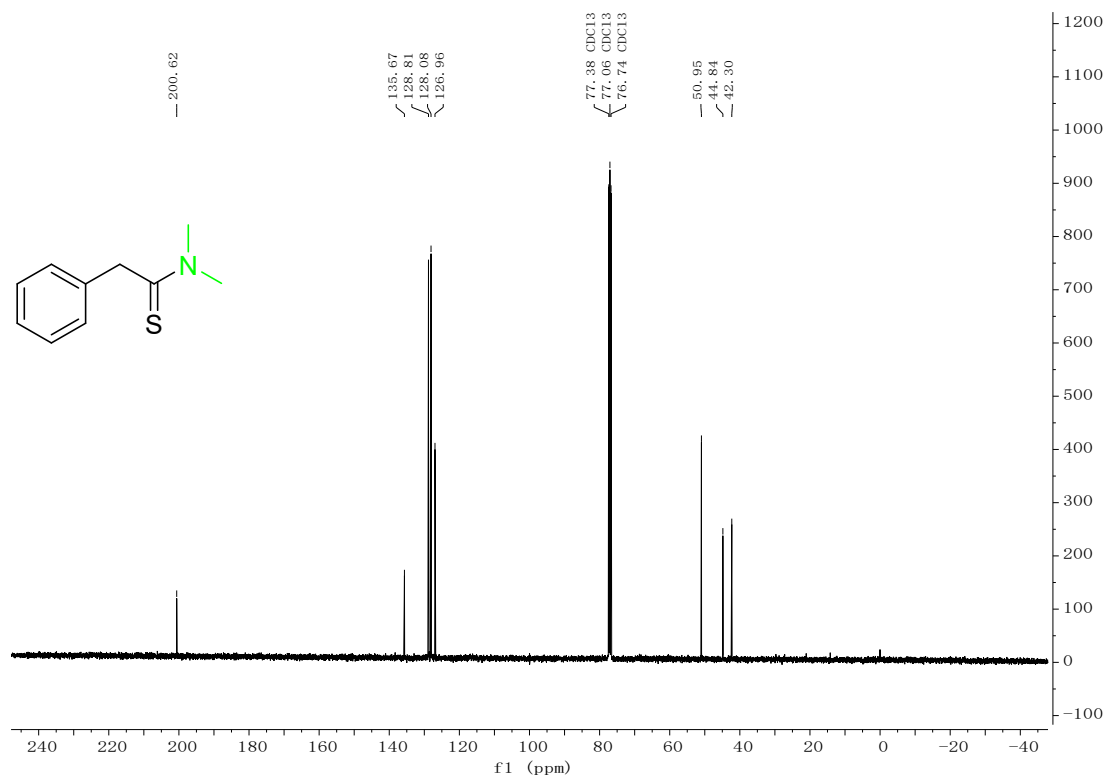

# Dibenzyl disulfide

## $^1\text{H}$ NMR

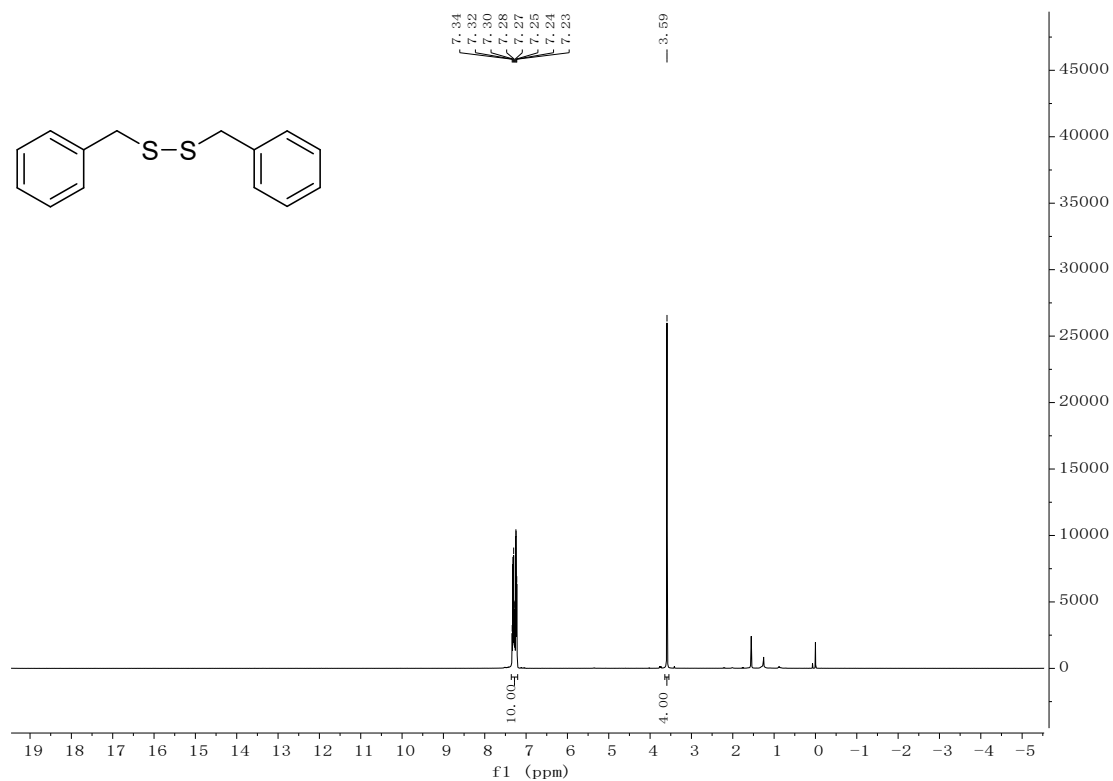

## $^{13}\text{C}$ NMR

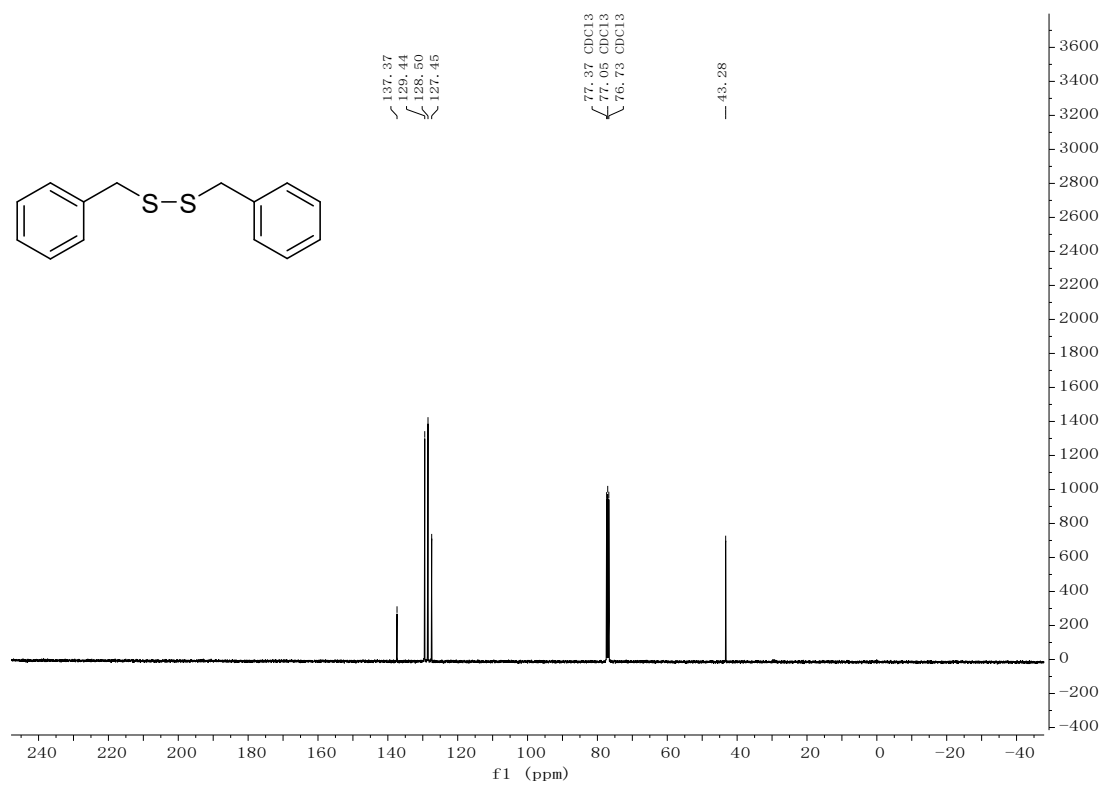

# Bis(3-methylbenzyl) disulfide

## <sup>1</sup>H NMR

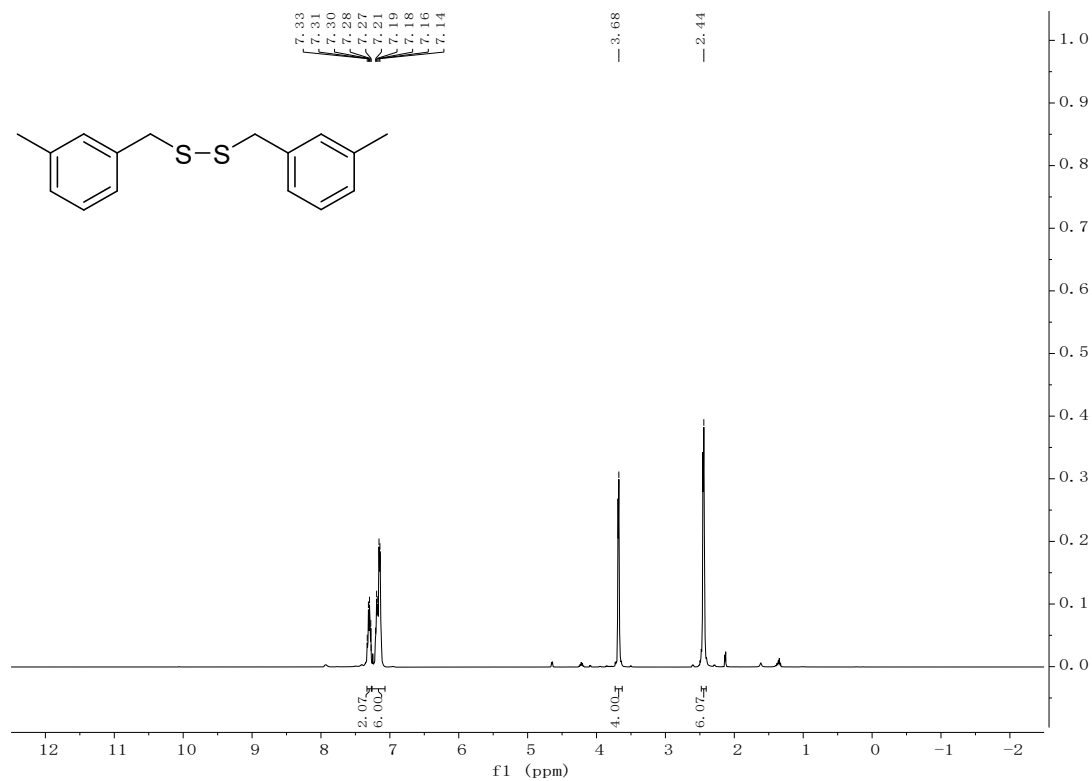

## <sup>13</sup>C NMR

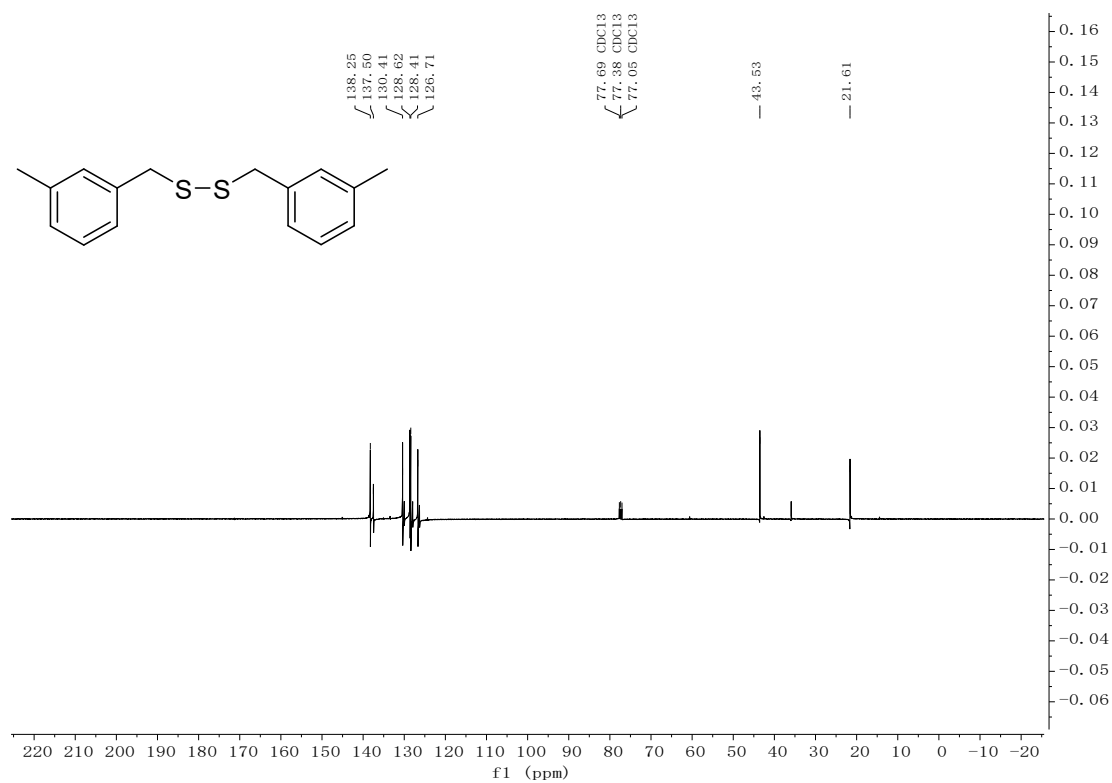

# Bis(4-methylbenzyl) disulfide

## <sup>1</sup>H NMR

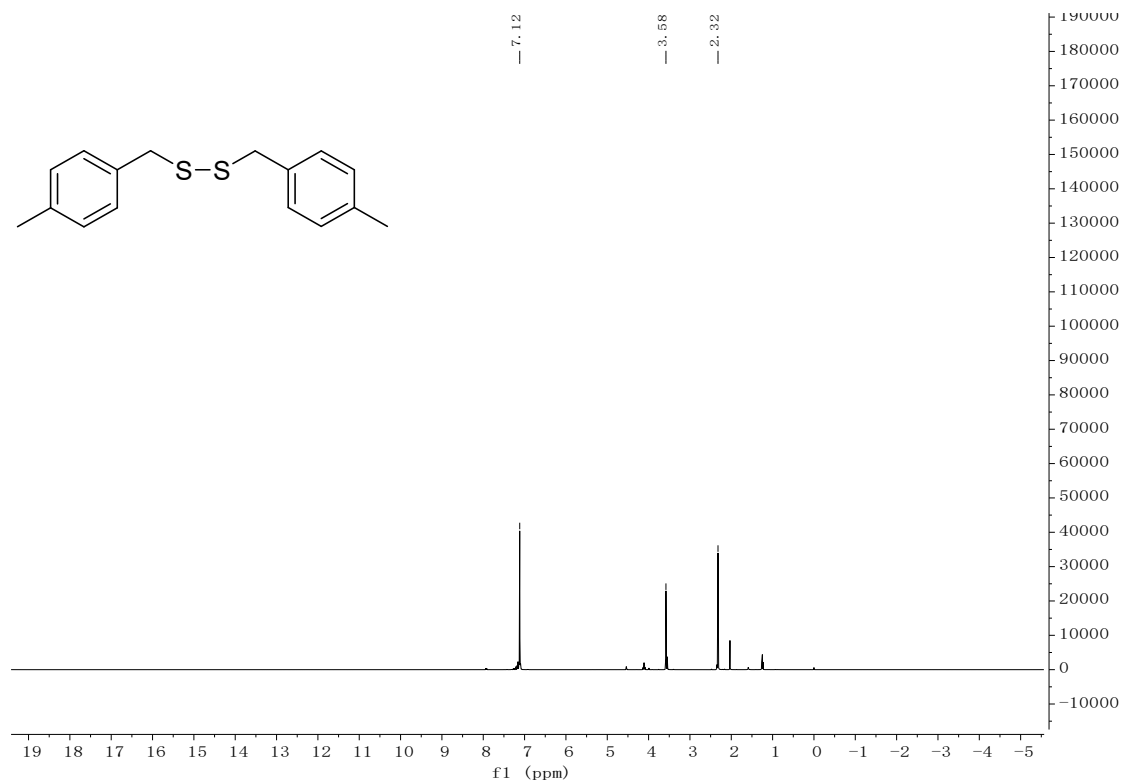

## <sup>13</sup>C NMR

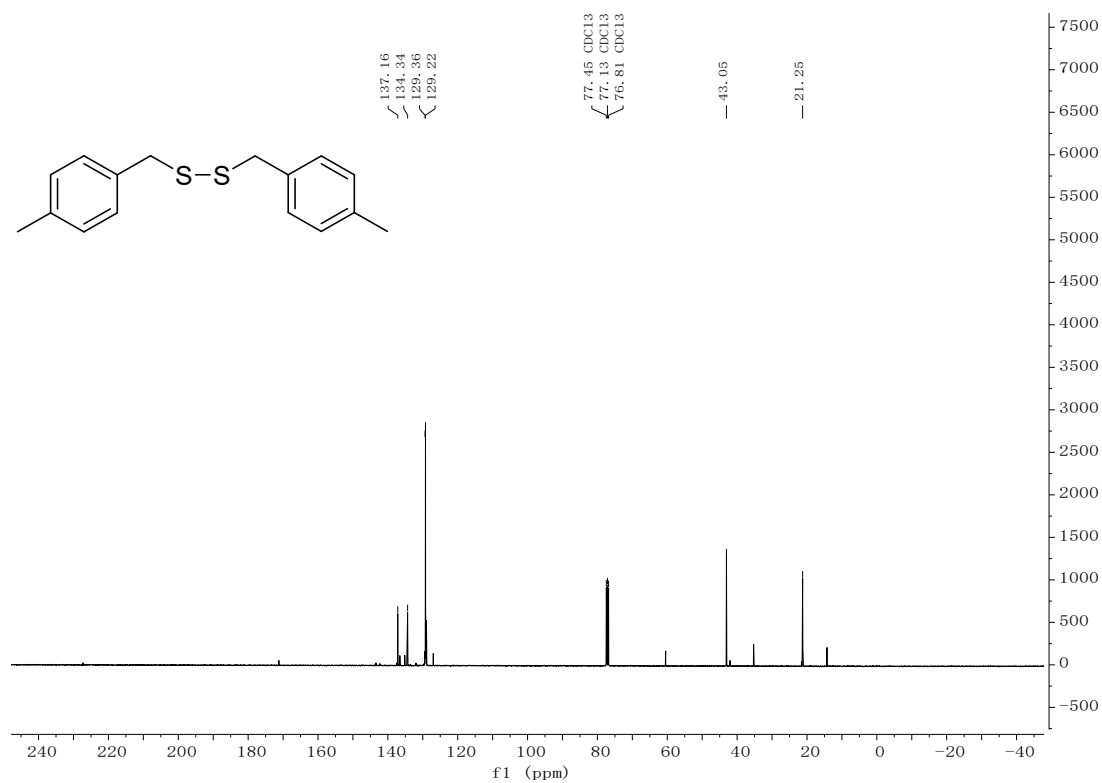

# Bis(3-methoxybenzyl) disulfide

## <sup>1</sup>H NMR

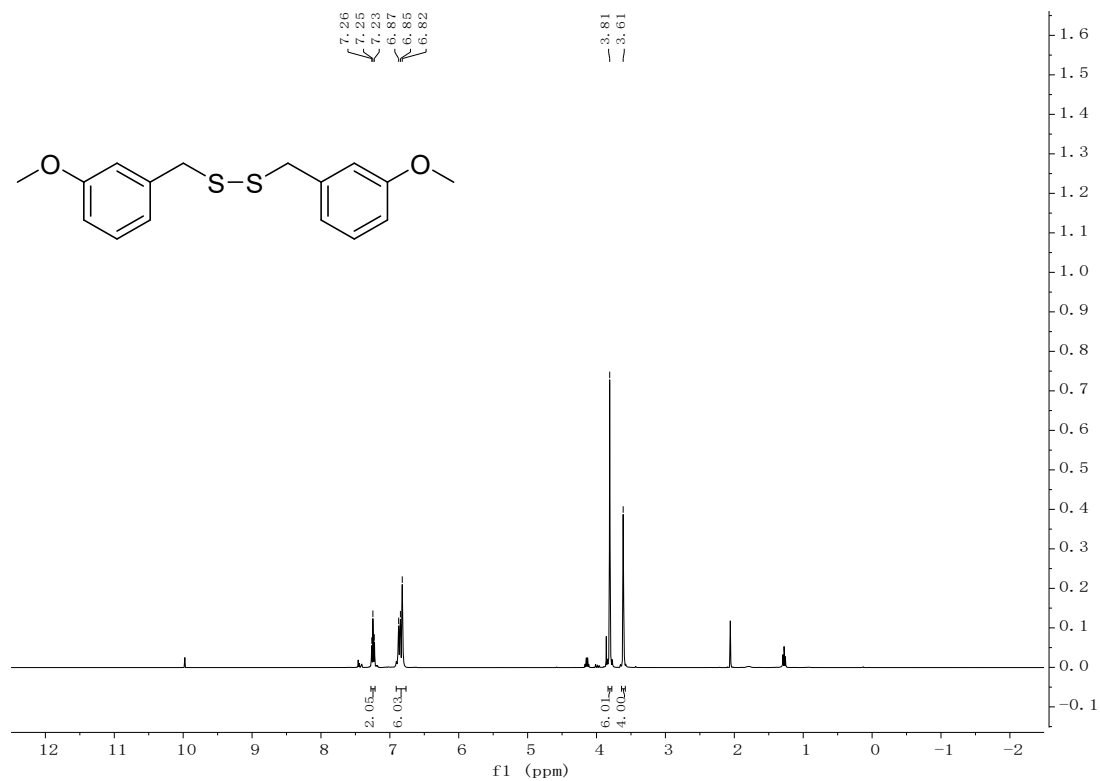

## <sup>13</sup>C NMR

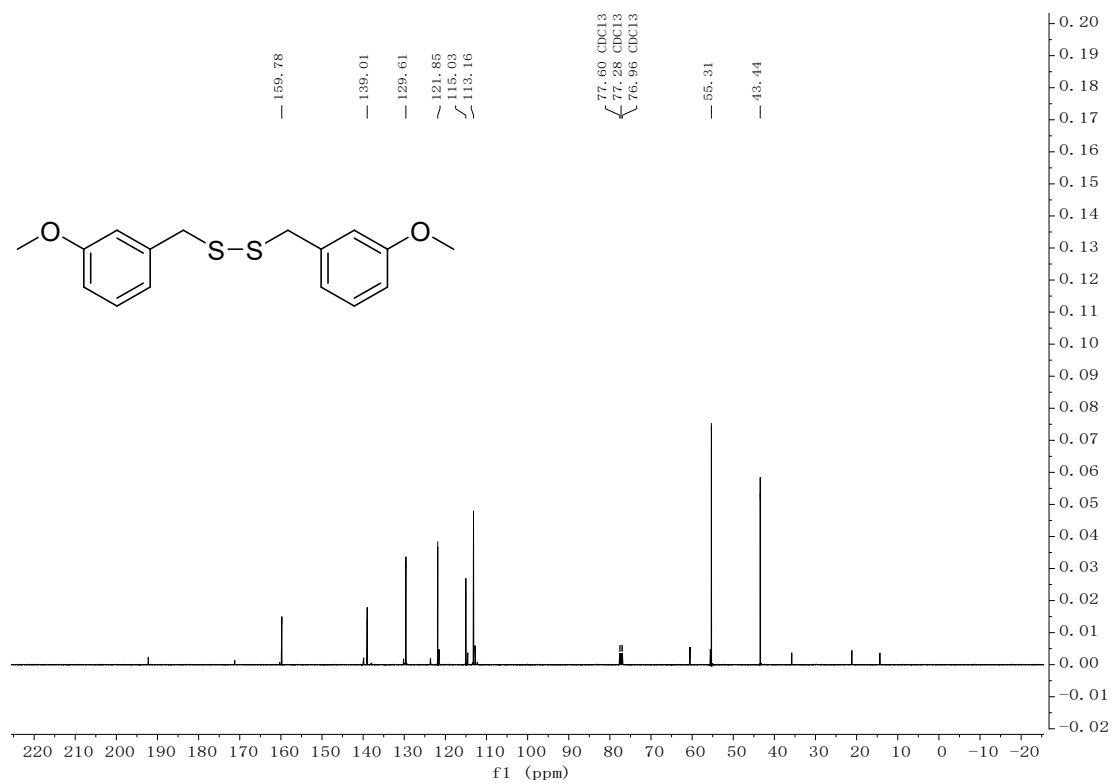



# Bis(4-*tert*-butylbenzyl) disulfide

## <sup>1</sup>H NMR

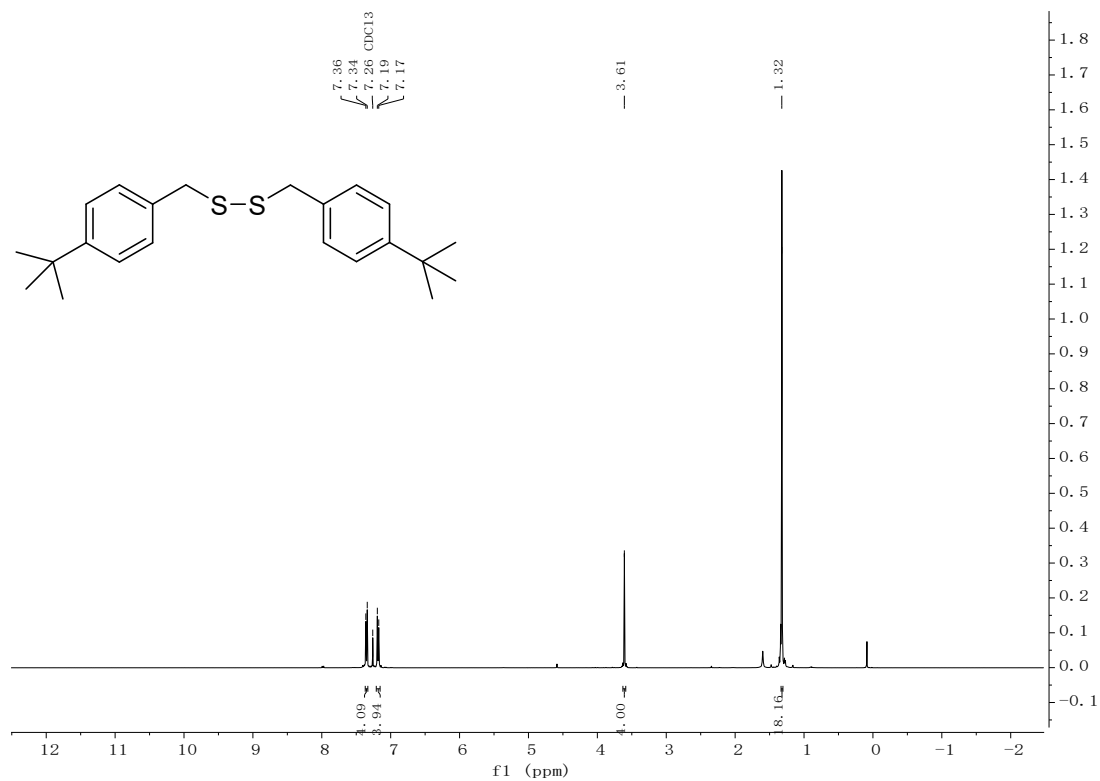

## <sup>13</sup>C NMR

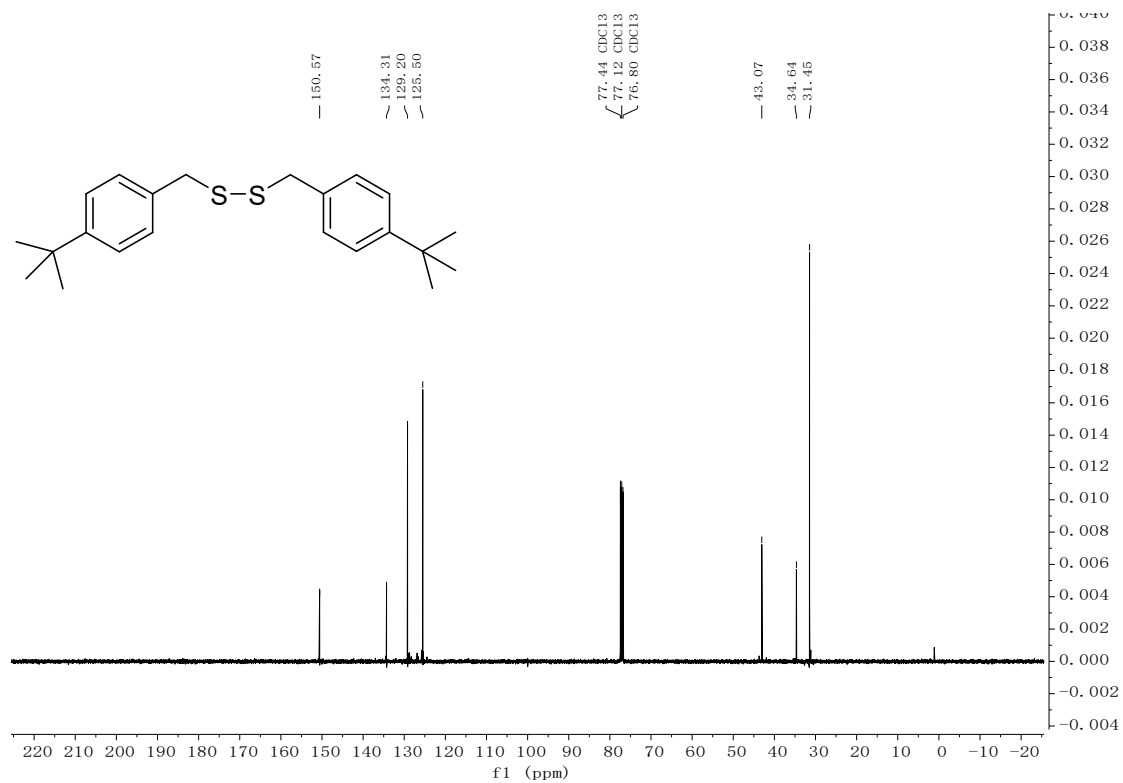

# Bis(4-fluorobenzyl) disulfide

## <sup>1</sup>H NMR

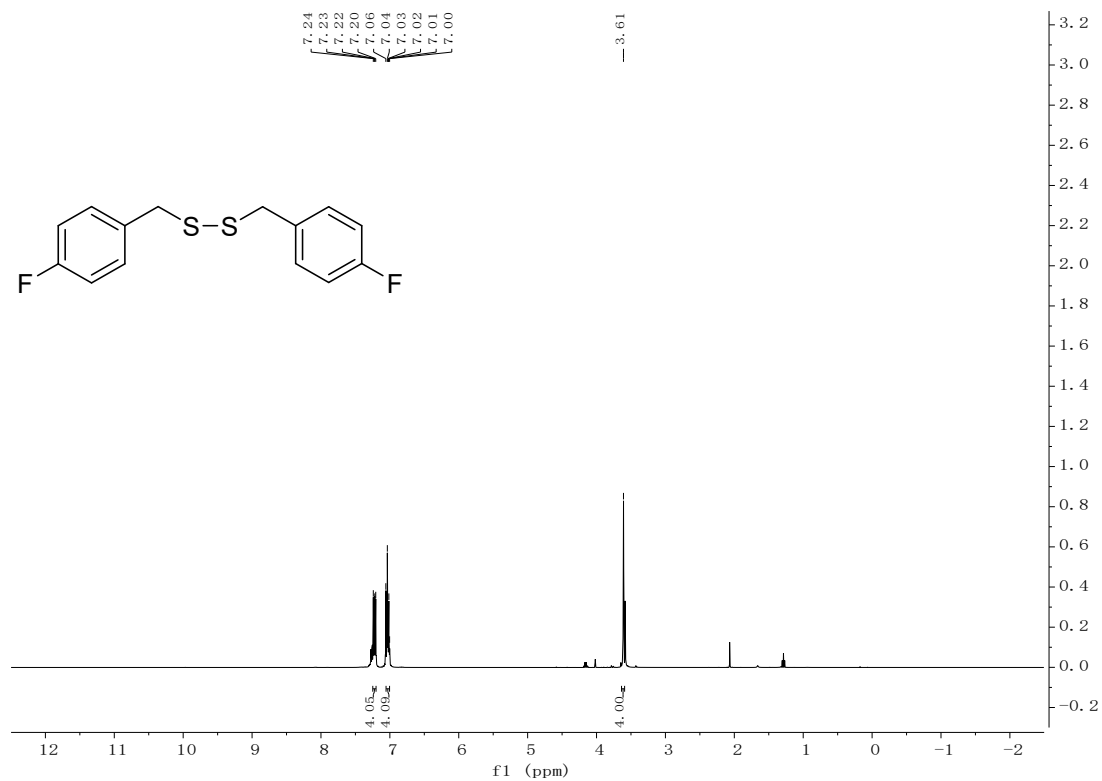

## <sup>13</sup>C NMR

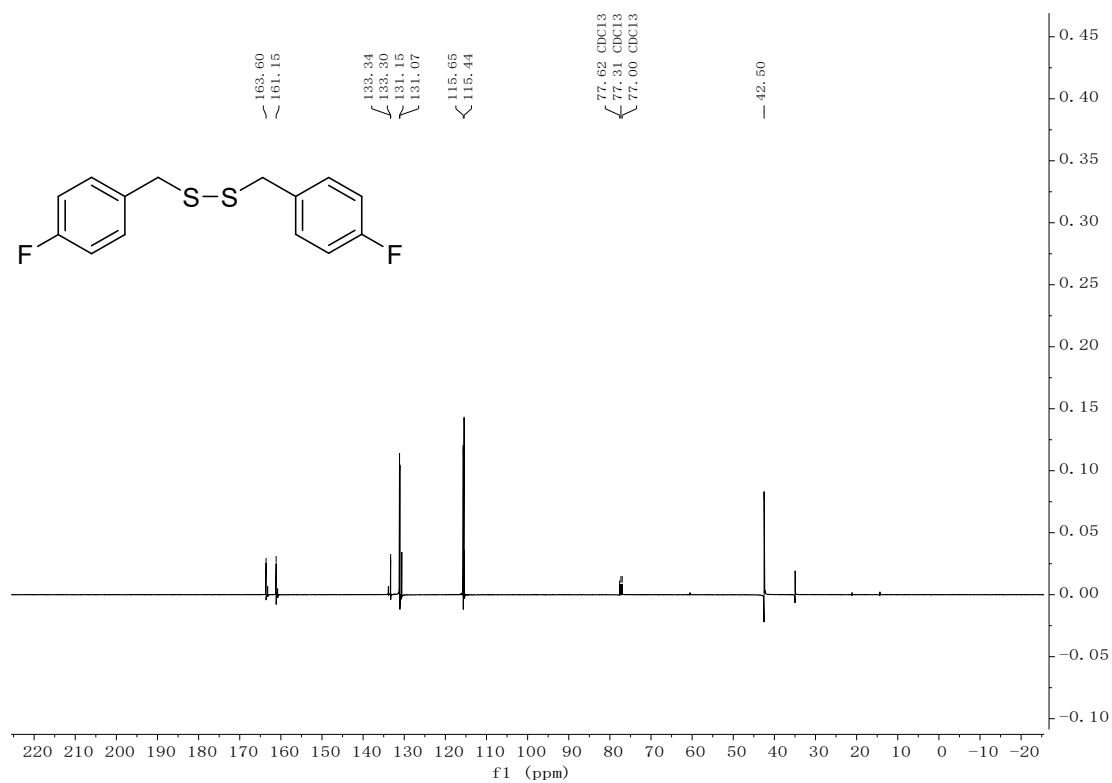

## <sup>19</sup>F NMR

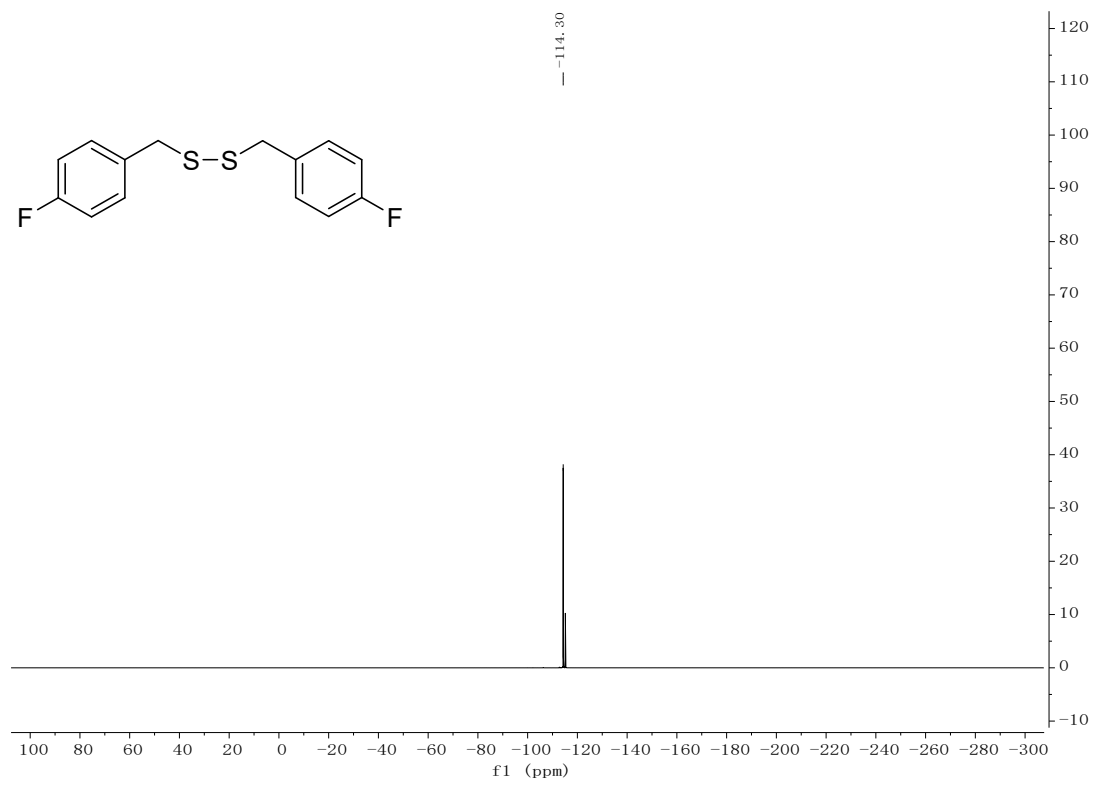

## Bis(4-chlorobenzyl) disulfide

### <sup>1</sup>H NMR

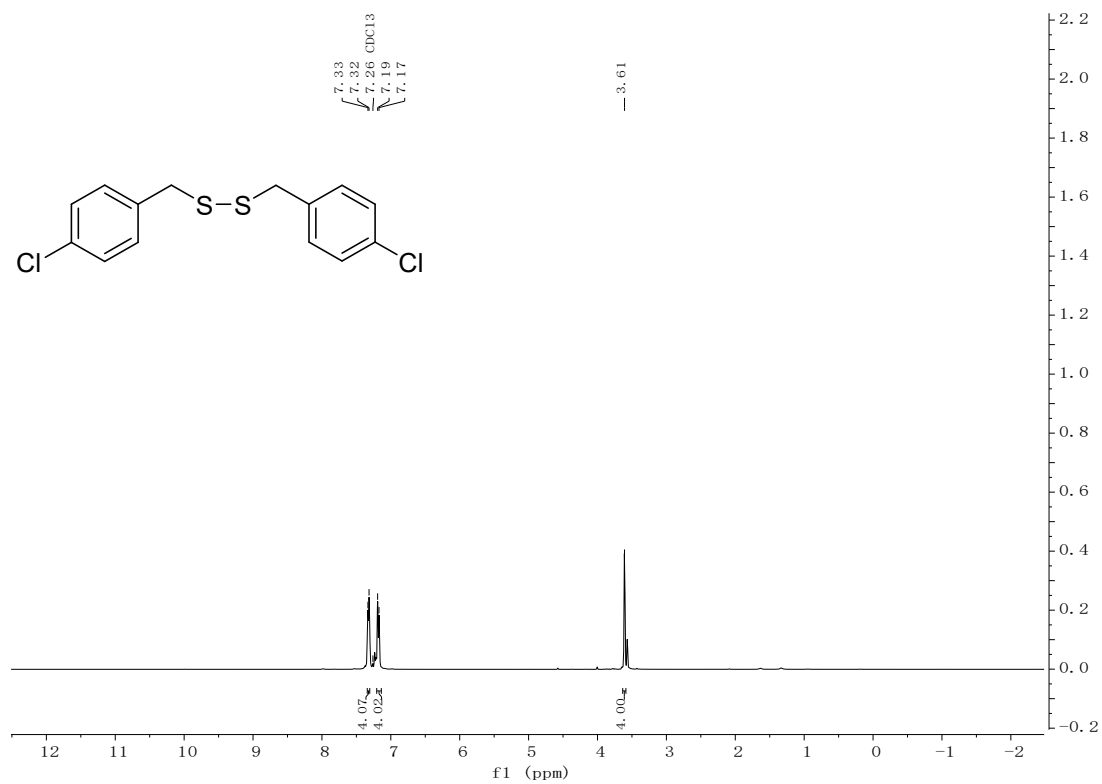

### <sup>13</sup>C NMR

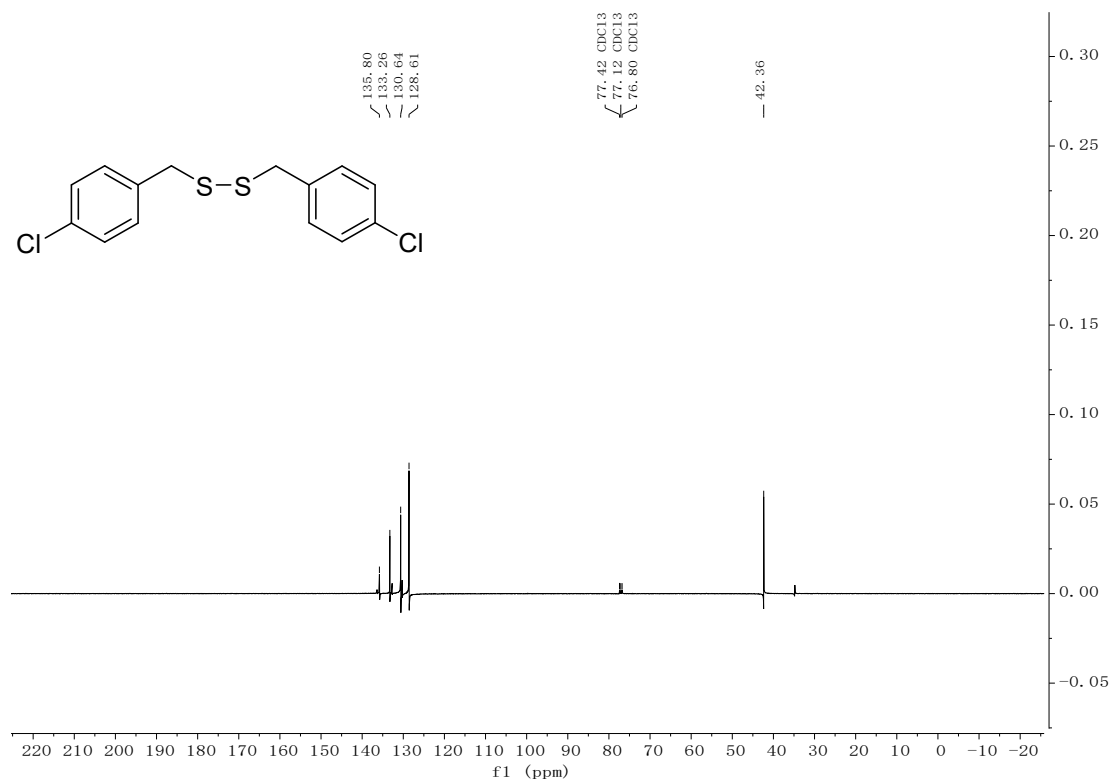

### Bis(4-bromobenzyl) disulfide

### <sup>1</sup>H NMR

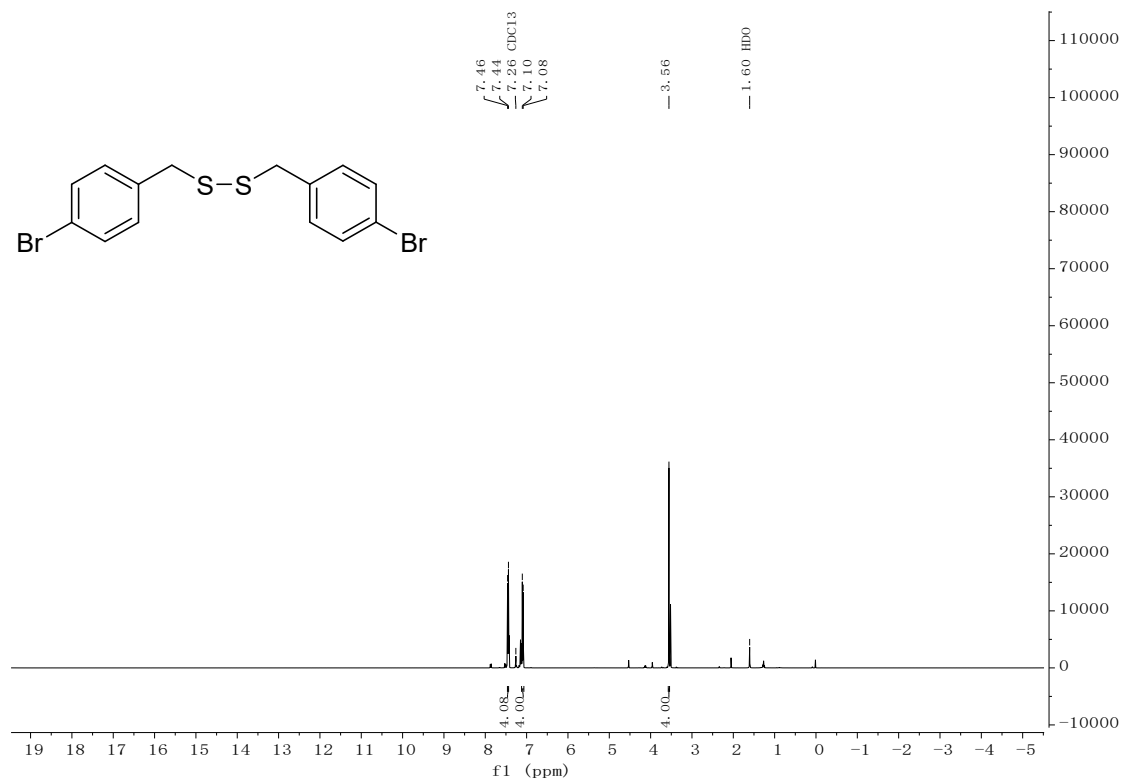

### <sup>13</sup>C NMR

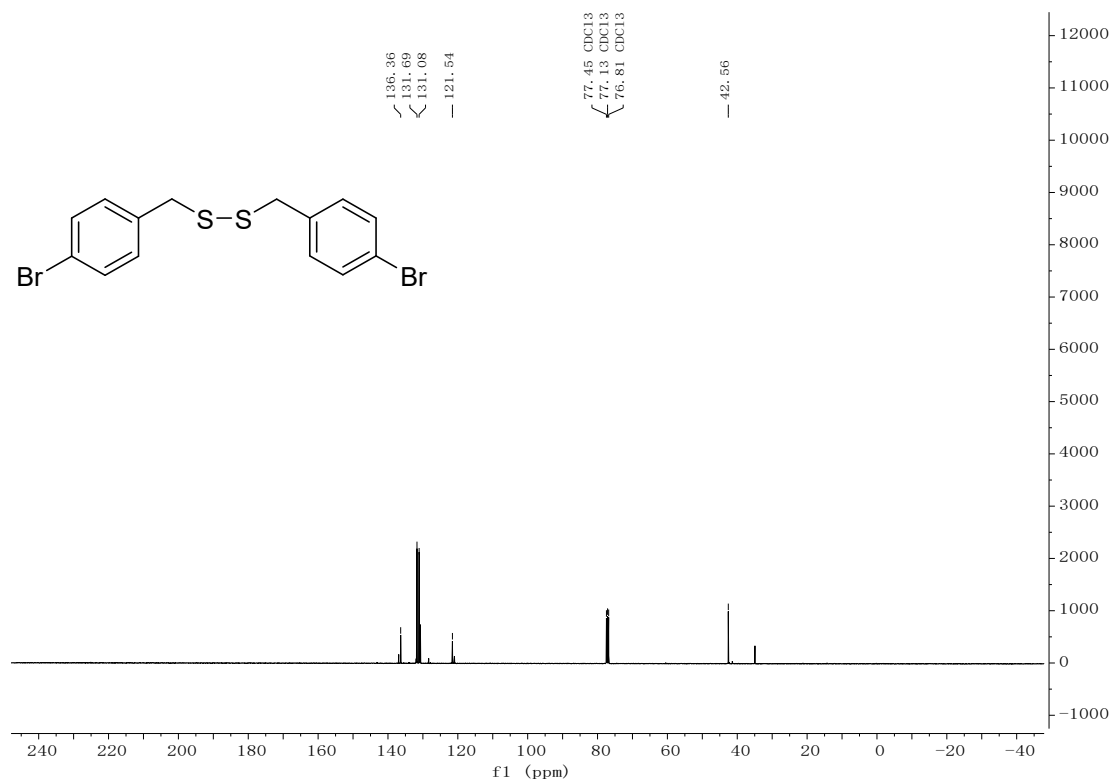

### Bis(3-trifluoromethylbenzyl) disulfide

### <sup>1</sup>H NMR

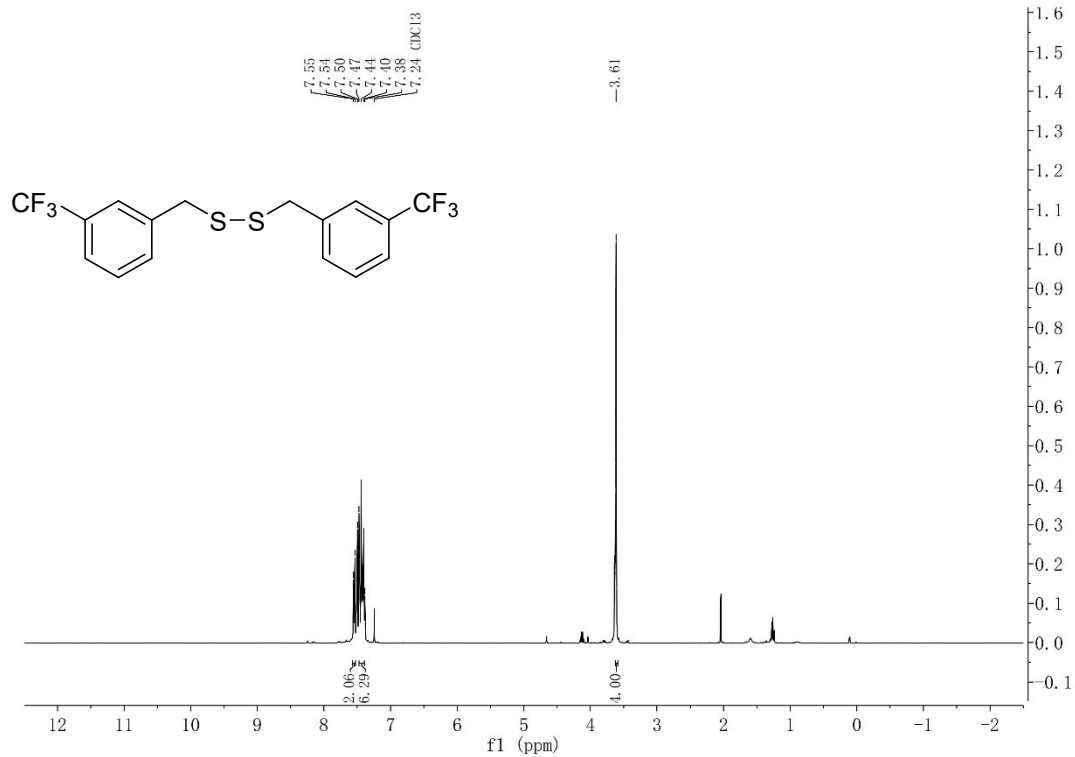

**<sup>13</sup>C NMR**

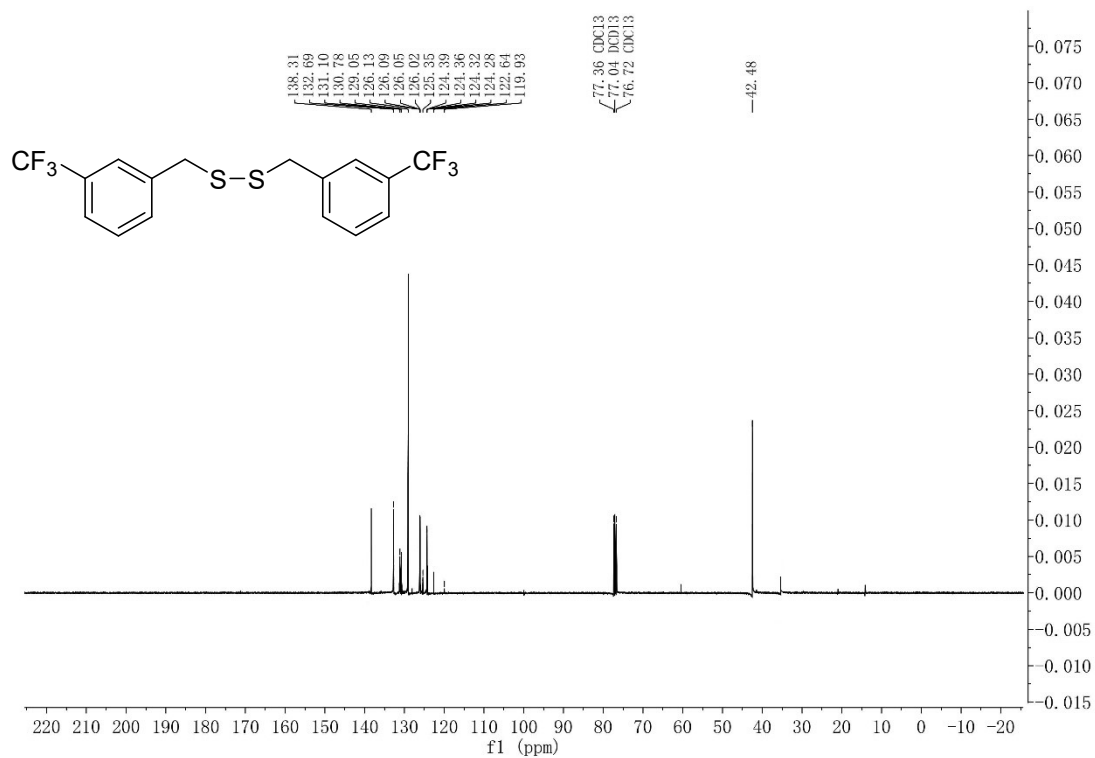

**<sup>19</sup>F NMR**

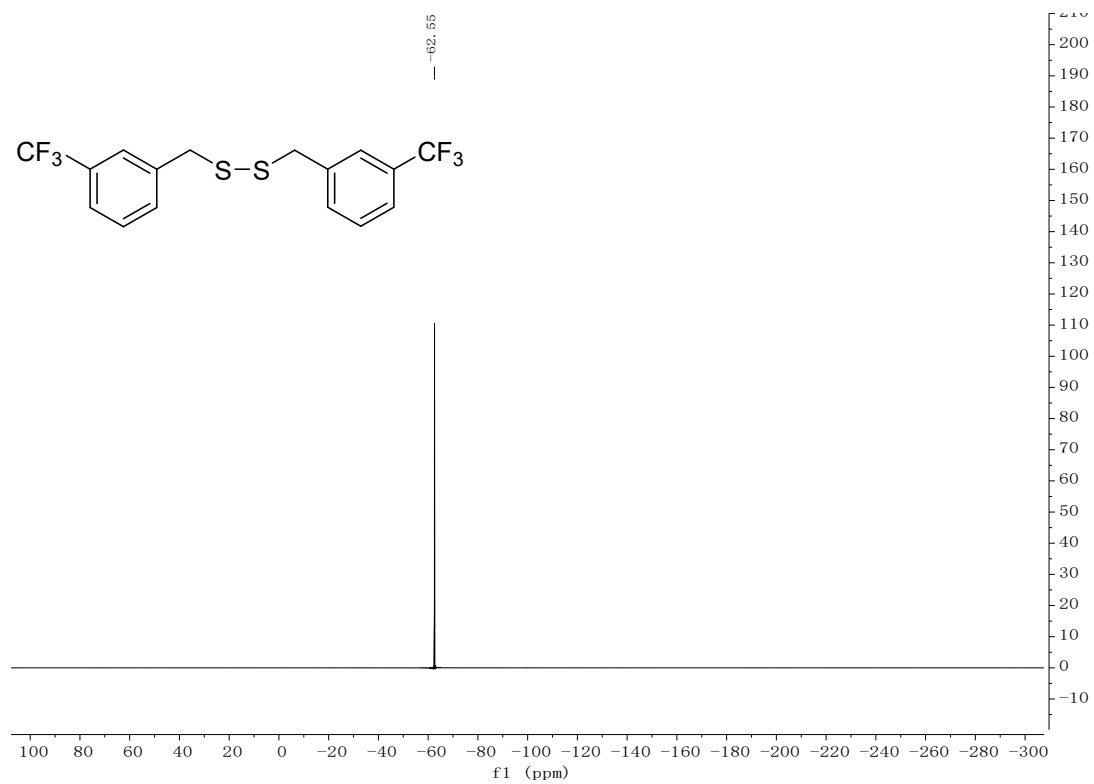

## Bis(3-pyridylmethyl) disulfide

<sup>1</sup>H NMR

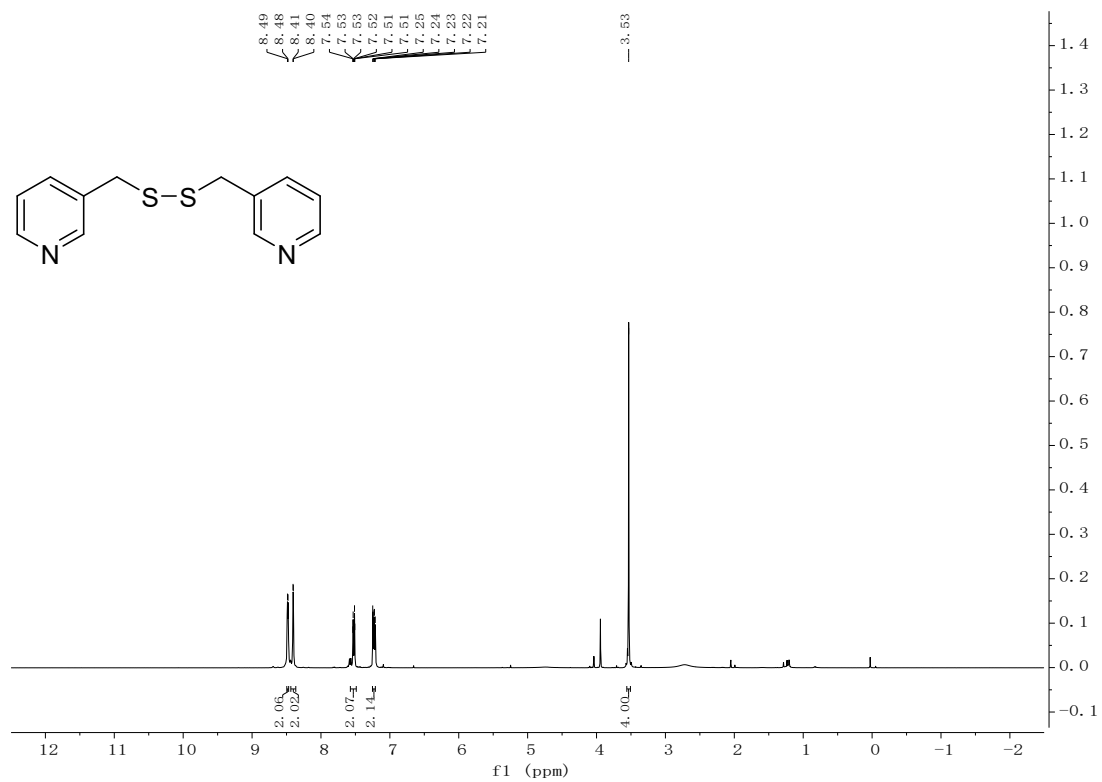

**<sup>13</sup>C NMR**

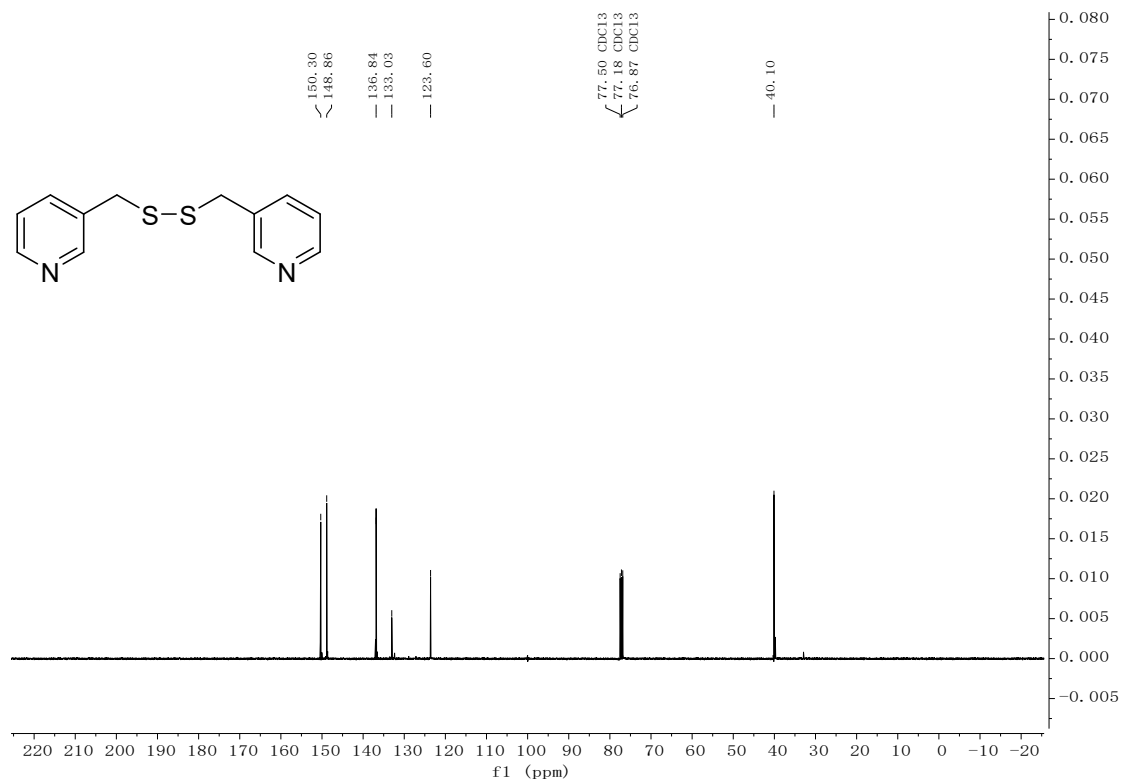

**Difurfuryl disulfide**

**<sup>1</sup>H NMR**



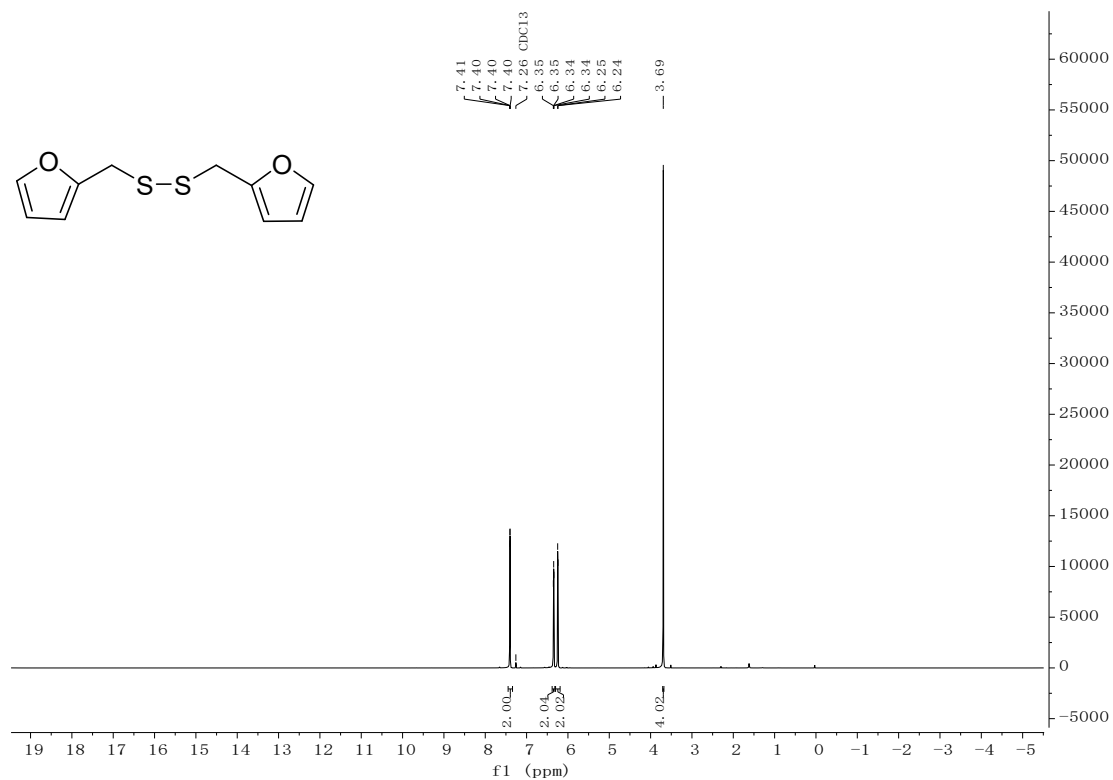

**<sup>13</sup>C NMR**

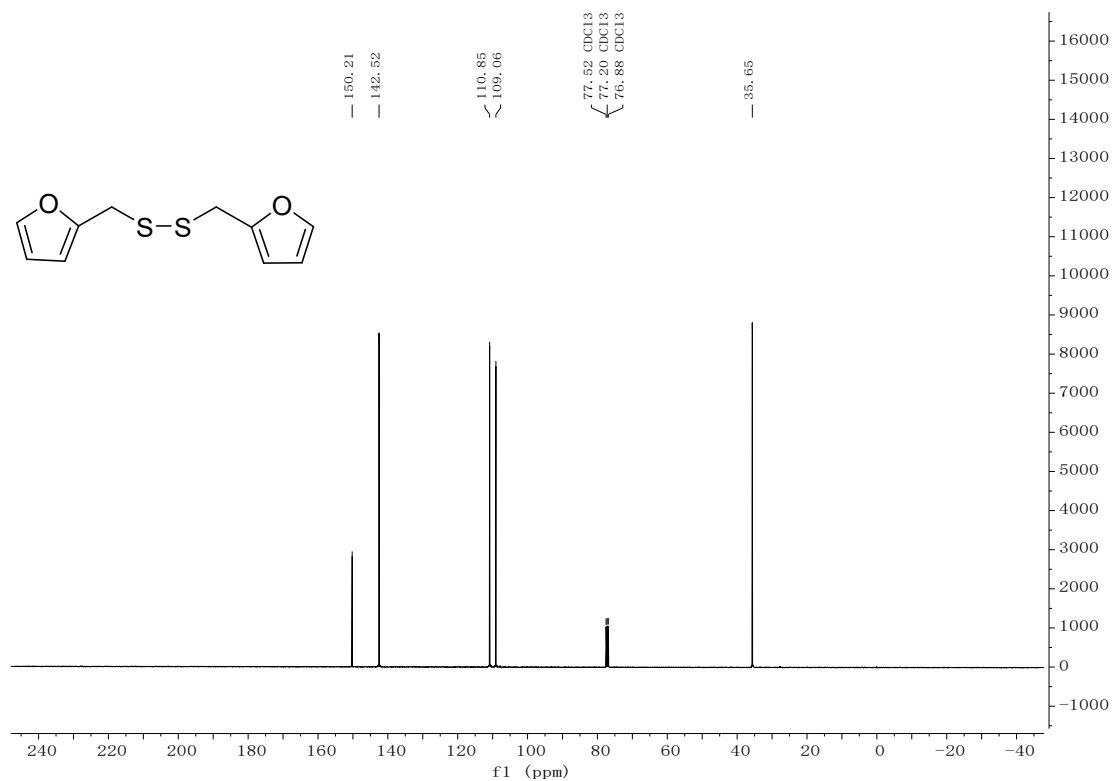

**Bis(2-phenylethyl) disulfide**

**<sup>1</sup>H NMR**

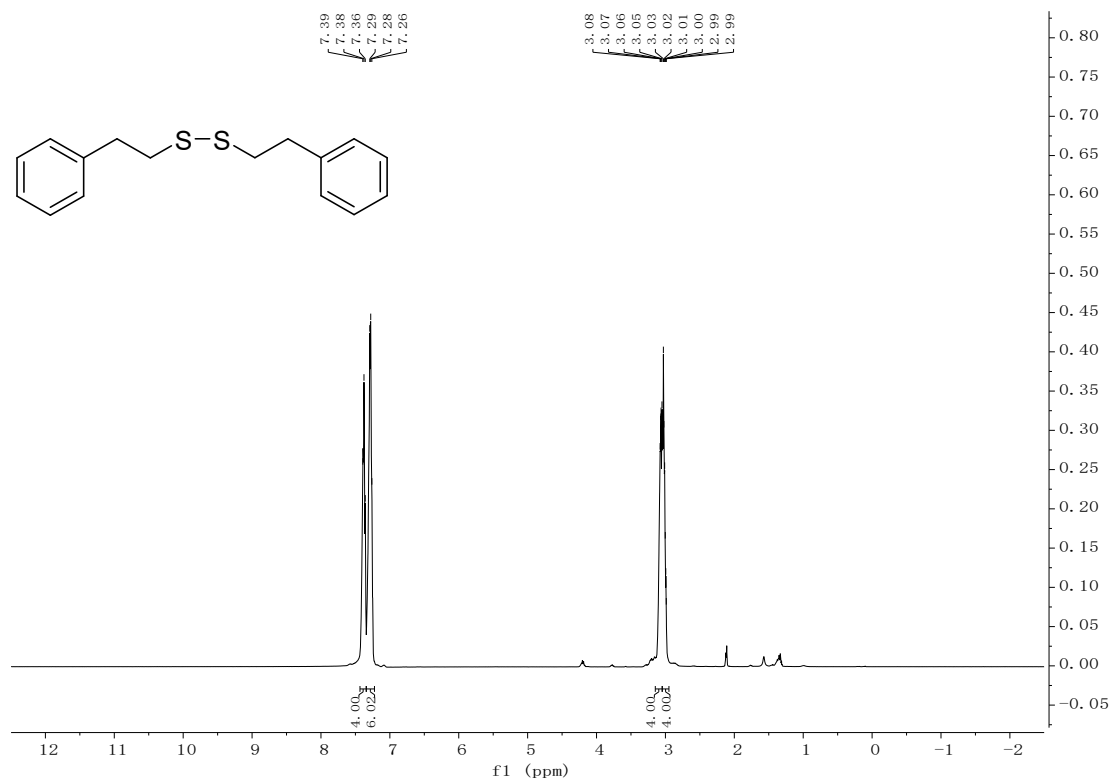

### <sup>13</sup>C NMR

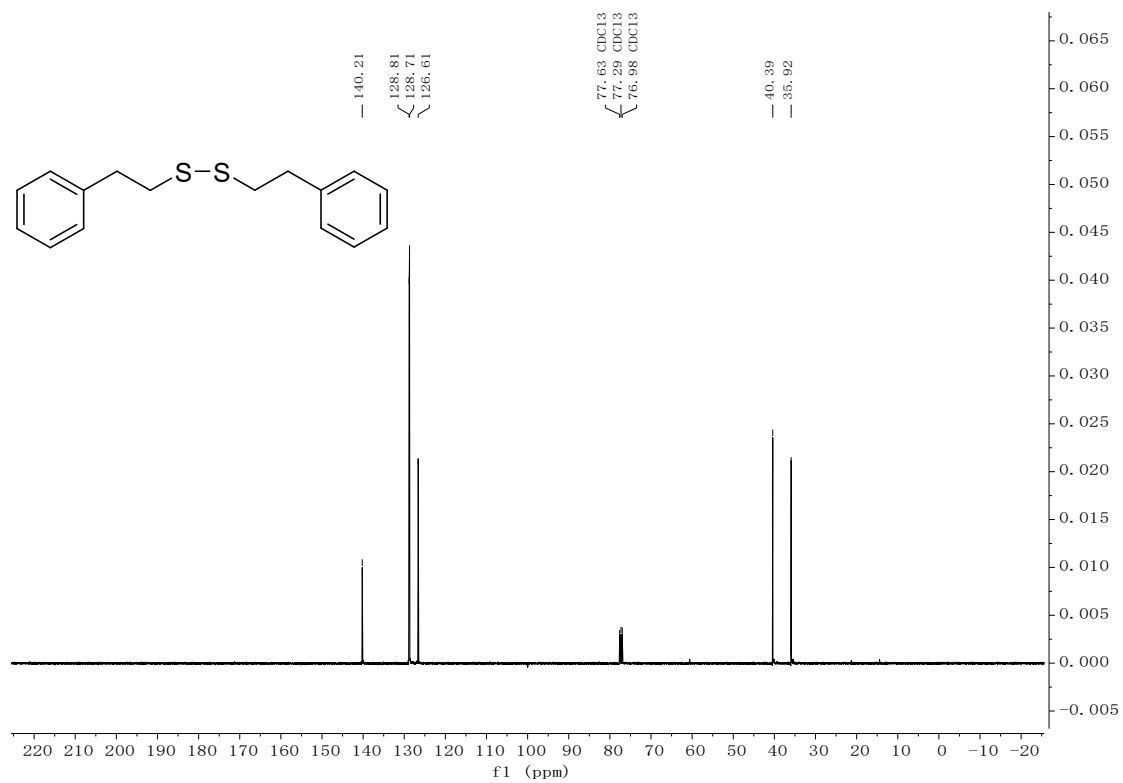

### Diisobutyl disulfide

### <sup>1</sup>H NMR

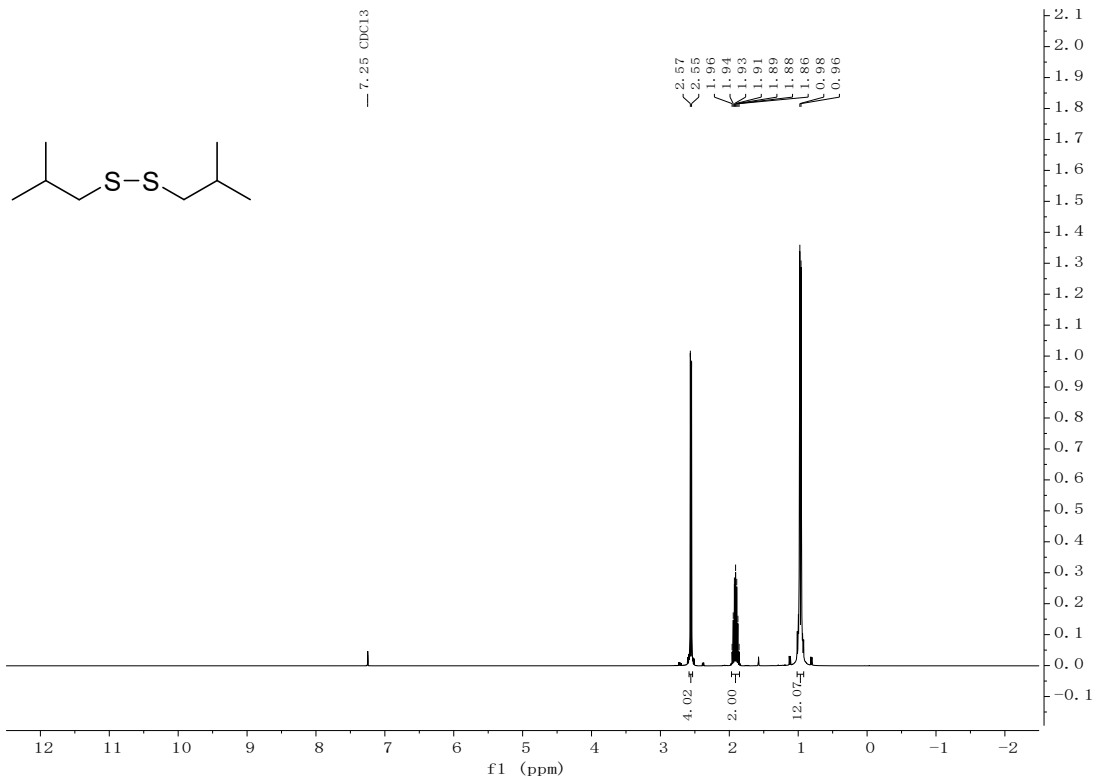

### <sup>13</sup>C NMR

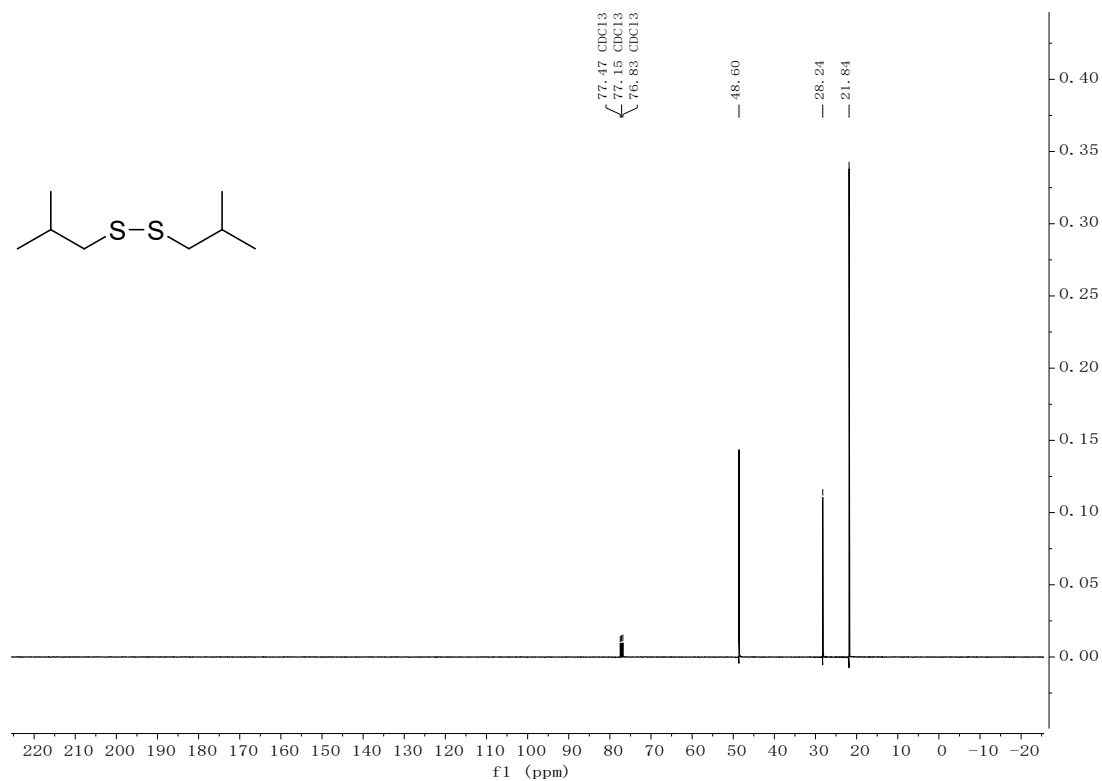

### Butyl disulfide

### <sup>1</sup>H NMR

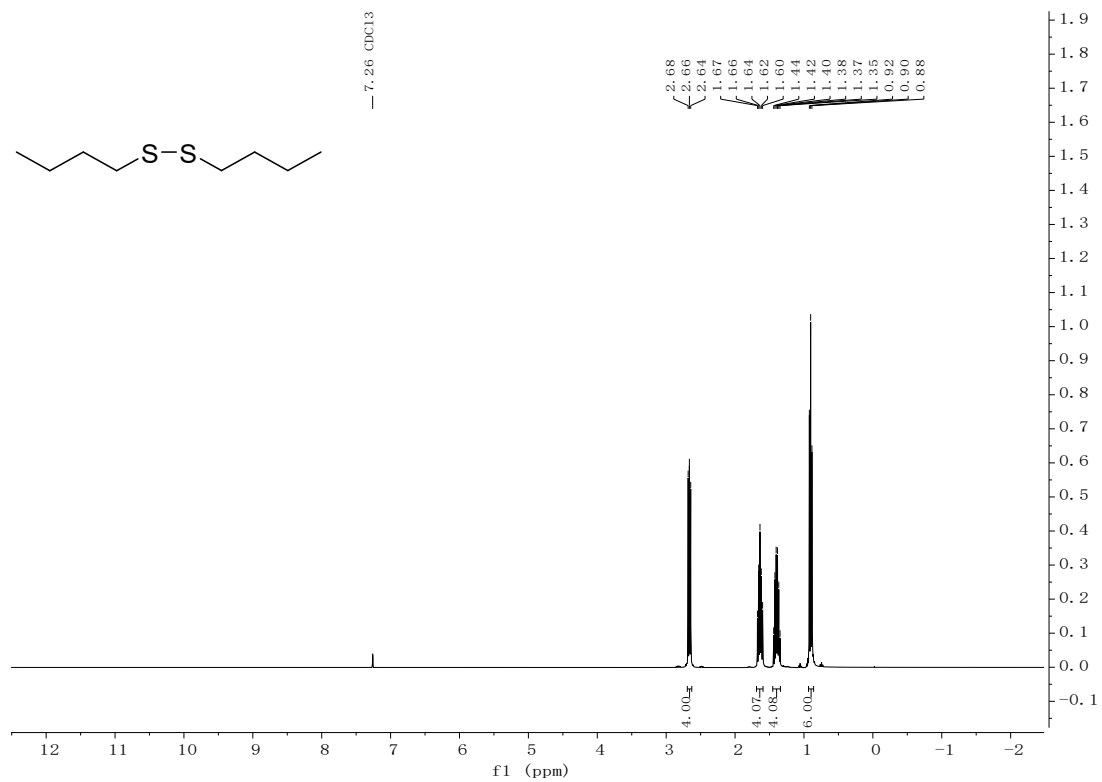

**<sup>13</sup>C NMR**

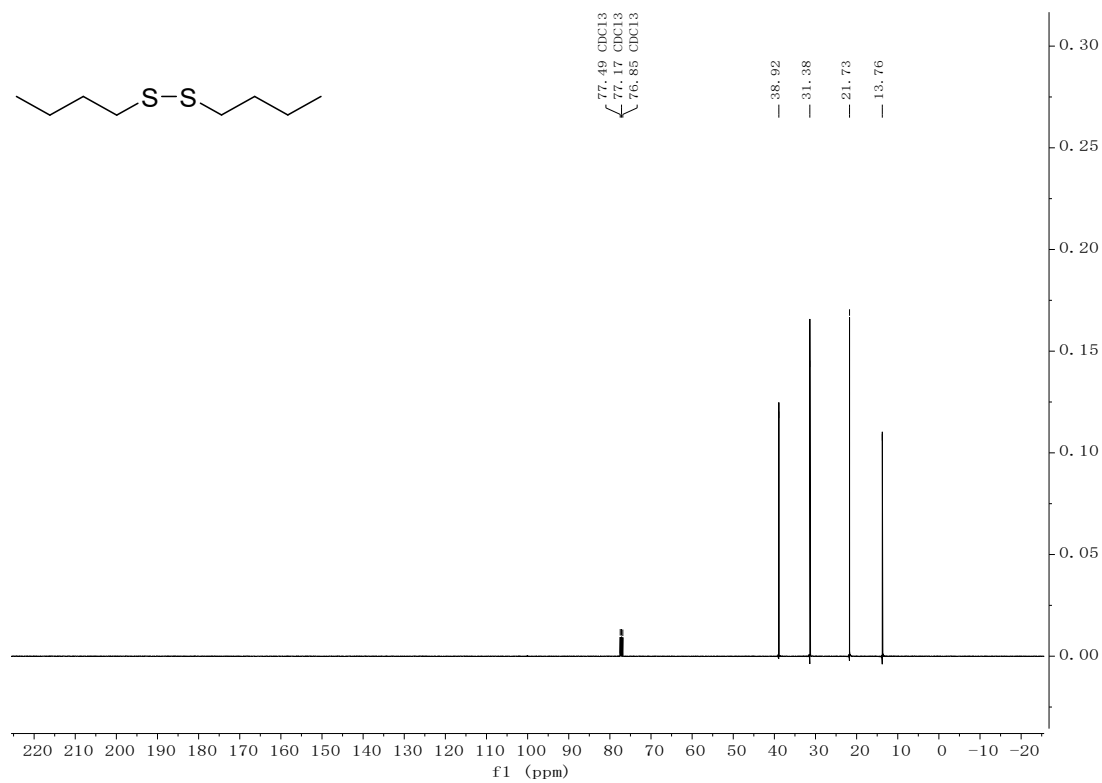

Supplement: d3re00163f2.pdf [file d3re00163f2.pdf]
